# Supplementary material for: INSIG1 parallel substitution drives lipid/sterol metabolic plasticity mediating desert adaptation in ungulates
Source: Research Square preprint supplement (doi:10.21203/rs.3.rs-6563084/v1), 2025-06-02
Supplement: Supplementary file 1 [file 45059594c26af048614f6220.xlsx]

## Sheet: ST_INDEX
TAB	TABLE	TITLE
ST_INDEX	Supplementary Table Index
ST1	Supplementary Table 4	The convergent positively selected genes (CPSGs) detected among Camelus and Hippotraginae lineages.
ST2	Supplementary Table 5	The convergent GO terms of convergent positively selected genes between Camelus and Hippotraginae
ST3	Supplementary Table 6	The convergent gene with parallel amino acid substitutions at conserved sites detected by PCOC, Conv_cal and CSUBST method with a series of standard in 25 pairwise comparison and 7 control groups
ST4	Supplementary Table 7	The positive selected sites of convergent genes calculated by MEME
ST5	Supplementary Table 8	The GO terms of convergent amino acid substitution genes among Camelus and Hippotraginae
ST6	Supplementary Table 9	The GO terms of convergent amino acid substitution genes among control groups
ST7	Supplementary Table 10	Untargeted metabolome data from camel serum
ST8	Supplementary Table 11	Untargeted metabolome data from mouse serum
ST9	Supplementary Table 12	Expression of INSIG1 and NPC1L1 in camels, cattle, and humans (FPKM)
ST10	Supplementary Table 13	cholesterol and triglyceride concentrations in serum and liver of mutant and wild-type mice after fasting for 14 hours
ST11	Supplementary Table 14	The differentially expressed genes in liver and visceral fat of wildtype and genome editing mice
ST12	Supplementary Table 15	Untargeted metabolome data of liver from wildtype and genome editing mouse
ST13	Supplementary Table 16	Bactrian transcriptome data for transcriptional annotation

## Sheet: Tables4
Table.S4 The convergent positively selected genes (CPSGs) detected among Camelus and Hippotraginae lineages.
cattle gene name	human gene name	P(foreground)	P(background)	P(difference between foreground and background)	Adjudted P(foreground)	Adjudted P(background)	Adjudted P(difference between foreground and background)
BHLHA9	BHLHA9	0	0.0316	0.0017	0	0.154001	0.0272763
LOC112448773	#N/A	0	0.0148	0	0	0.0818842	0
MCUR1	MCUR1	0	0.2032	0.0001	0	0.5	0.00223882
LOC112449091	#N/A	0	0.4765	0.002	0	0.5	0.0313659
SORCS2	SORCS2	0	0.0869	0	0	0.349808	0
PAPPA	PAPPA	0	0.0667	0	0	0.285873	0
LOC112446802	H2BC12	0	0.3355	0.0002	0	0.5	0.00420672
SH3PXD2B	SH3PXD2B	0	0.5	0	0	0.5	0
CALHM6	CALHM6	0.0001	0.2912	0.001	0.000699162	0.5	0.0171674
ALPK2	ALPK2	0	0.5	0.001	0	0.5	0.0171674
SPADH1	LOC112577516	0	0.0844	0	0	0.34261	0
APCS	APCS	0	0.2641	0.0023	0	0.5	0.0354489
GCSAM	GCSAM	0.0009	0.3836	0.0021	0.00541254	0.5	0.0326884
DPH3	DPH3	0	0.0393	0.0007	0	0.184417	0.0126414
ZAR1	ZAR1	0	0.3093	0.0033	0	0.5	0.0486449
CRYBG3	CRYBG3	0	0.0166	0.0001	0	0.0902472	0.00223882
ANKRD13C	ANKRD13C	0	0.4635	0.0007	0	0.5	0.0126414
MAGEF1	MAGEF1	0	0.4918	0.0002	0	0.5	0.00420672
LOC510536	C10orf88	0	0.5	0.0003	0	0.5	0.00602648
HSD11B1	HSD11B1	0.0012	0.4321	0.0026	0.00701448	0.5	0.0394891
LOC504861	SLC7A3	0	0.4019	0	0	0.5	0
COL5A1	COL5A1	0	0.5	0	0	0.5	0
NUDT19	NUDT19	0	0.2882	0	0	0.5	0
ANKRD53	ANKRD53	0	0.2353	0.0001	0	0.5	0.00223882
ZNF831	ZNF831	0	0.0974	0	0	0.382719	0
PAEP	PAEP	0	0.1803	0	0	0.5	0
GTSE1	GTSE1	0	0.1042	0.0023	0	0.40336	0.0354489
CLIC6	CLIC6	0	0.0713	0	0	0.300141	0
FRRS1L	FRRS1L	0	0.4401	0	0	0.5	0
SAPCD2	SAPCD2	0	0.5	0	0	0.5	0
LOC101905136	#N/A	0	0.0092	0	0	0.0542848	0
ZNF792	ZNF792	0	0.012	0.0004	0	0.0683258	0.00779751
C5H12orf56	C12orf56	0	0.5	0	0	0.5	0
TMPO	TMPO	0	0.5	0	0	0.5	0
ANKRD60	ANKRD60	0	0.219	0	0	0.5	0
TDRD6	TDRD6	0	0.0355	0.0006	0	0.169509	0.0110752
LOC100301263	NLRP7	0	0.5	0	0	0.5	0
LOC787057	ZNF415	0.0001	0.1747	0.0025	0.000699162	0.5	0.038109
GAK	GAK	0	0.0168	0.0004	0	0.0911365	0.00779751
TAP1	TAP1	0	0.2463	0.001	0	0.5	0.0171674
M1AP	M1AP	0	0.5	0.0005	0	0.5	0.00948106
GP9	GP9	0	0.5	0	0	0.5	0
CCDC170	CCDC170	0	0.5	0	0	0.5	0
AVEN	AVEN	0	0.5	0	0	0.5	0
CRTAM	CRTAM	0.0003	0.5	0.0002	0.00196365	0.5	0.00420672
BUD13	BUD13	0	0.5	0.0015	0	0.5	0.0243799
LRRN4	LRRN4	0	0.5	0	0	0.5	0
IRAK3	IRAK3	0	0.17	0	0	0.5	0
ANKRD65	ANKRD65	0	0.3754	0	0	0.5	0
LOC782688	SET	0.0019	0.5	0.0004	0.0106154	0.5	0.00779751
EGFL7	EGFL7	0	0.2704	0.0013	0	0.5	0.0214072
SECISBP2	SECISBP2	0	0.5	0.003	0	0.5	0.0446433
CEP162	CEP162	0	0.0398	0.0001	0	0.186414	0.00223882
DNLZ	DNLZ	0	0.5	0.0002	0	0.5	0.00420672
MBP	MBP	0	0.0299	0	0	0.14663	0
PARP12	PARP12	0	0.5	0	0	0.5	0
NEURL1B	NEURL1B	0	0.5	0	0	0.5	0
SLC2A4RG	SLC2A4RG	0	0.0166	0	0	0.0902472	0
LOC529823	C2CD4A	0	0.5	0	0	0.5	0
ASMTL	ASMTL	0	0.5	0	0	0.5	0
EGLN1	EGLN1	0	0.0088	0.0002	0	0.0522696	0.00420672
MAP3K1	MAP3K1	0	0.0869	0	0	0.349808	0
CYP21	CYP21A2	0	0.072	0	0	0.302376	0
FADD	FADD	0	0.5	0	0	0.5	0
TFAP2A	TFAP2A	0	0.5	0.0001	0	0.5	0.00223882
TERT	TERT	0.0002	0.5	0.0002	0.00134642	0.5	0.00420672
ZFAND1	ZFAND1	0	0.5	0.0001	0	0.5	0.00223882
SPAG1	SPAG1	0	0.017	0	0	0.0921416	0
FAM162B	FAM162B	0.0001	0.5	0.0008	0.000699162	0.5	0.0141612
GDF6	GDF6	0	0.0403	0.0008	0	0.188333	0.0141612
ECI2	ECI2	0	0.2266	0	0	0.5	0
LRRC6	DNAAF11	0	0.5	0.0001	0	0.5	0.00223882
ABI3BP	ABI3BP	0	0.0689	0.001	0	0.292696	0.0171674
GAB3	GAB3	0	0.283	0	0	0.5	0
CYS1	CYS1	0	0.1279	0.0002	0	0.475682	0.00420672
CST3	CST3	0	0.4926	0.001	0	0.5	0.0171674
GPLD1	GPLD1	0.0001	0.5	0.0008	0.000699162	0.5	0.0141612
C4H7orf57	C7orf57	0	0.5	0.0029	0	0.5	0.0434133
WIPF3	WIPF3	0	0.0565	0.0012	0	0.2503	0.0200507
LOC112446637	TMDD1	0	0.4716	0.0016	0	0.5	0.0258041
SCYL3	SCYL3	0	0.407	0.0001	0	0.5	0.00223882
KIAA1211L	CRACDL	0	0.5	0	0	0.5	0
BFSP1	BFSP1	0	0.0228	0.0003	0	0.117715	0.00602648
NYX	NYX	0	0.5	0	0	0.5	0
ZNF775	ZNF775	0	0.0233	0.0002	0	0.119753	0.00420672
DIAPH2	DIAPH2	0	0.4488	0.0005	0	0.5	0.00948106
C28H1orf198	C1orf198	0	0.5	0.0001	0	0.5	0.00223882
CRLS1	CRLS1	0	0.0995	0.0033	0	0.388531	0.0486449
PROK2	PROK2	0	0.5	0	0	0.5	0
LOC100297056	CTU1	0	0.0149	0	0	0.0822919	0
MVB12B	MVB12B	0	0.2349	0	0	0.5	0
TMEM131L	TMEM131L	0	0.4204	0	0	0.5	0
YY1	YY1	0	0.1099	0	0	0.421255	0
ZNF605	ZNF605	0	0.0688	0.0016	0	0.29247	0.0258041
HLCS	HLCS	0	0.1325	0	0	0.488291	0
YBX3	YBX3	0	0.0615	0.0004	0	0.268272	0.00779751
FAM69C	DIPK1C	0	0.3517	0	0	0.5	0
DUSP16	DUSP16	0	0.5	0	0	0.5	0
VPS9D1	VPS9D1	0	0.5	0.0005	0	0.5	0.00948106
ARHGAP23	ARHGAP23	0	0.4925	0	0	0.5	0
ASB18	ASB18	0	0.3968	0	0	0.5	0
ARHGAP29	ARHGAP29	0	0.5	0.0002	0	0.5	0.00420672
PDE8A	PDE8A	0	0.5	0	0	0.5	0
SLC35D2	SLC35D2	0	0.5	0	0	0.5	0
GSC2	GSC2	0	0.1301	0	0	0.481517	0
GJD4	GJD4	0	0.5	0	0	0.5	0
TMEM64	TMEM64	0	0.5	0	0	0.5	0
SNX19	SNX19	0	0.5	0.0023	0	0.5	0.0354489
DONSON	DONSON	0	0.5	0	0	0.5	0
TEAD4	TEAD4	0	0.4555	0	0	0.5	0
ZNF511	ZNF511	0	0.5	0	0	0.5	0
RNF169	RNF169	0	0.5	0.0003	0	0.5	0.00602648
SIRT1	SIRT1	0	0.5	0	0	0.5	0
ARHGAP27	ARHGAP27	0	0.0206	0	0	0.108232	0
NAT8L	NAT8L	0	0.2514	0	0	0.5	0
BAIAP2L2	BAIAP2L2	0	0.0346	0	0	0.166035	0
MDN1	MDN1	0	0.5	0	0	0.5	0
DCP1B	DCP1B	0	0.4707	0	0	0.5	0
MORC4	MORC4	0	0.5	0	0	0.5	0
DACT1	DACT1	0	0.5	0	0	0.5	0
YRDC	YRDC	0	0.5	0	0	0.5	0
MRE11	MRE11	0	0.5	0.0002	0	0.5	0.00420672
ZBTB42	ZBTB42	0	0.4125	0	0	0.5	0
ABHD12	ABHD12	0	0.3691	0	0	0.5	0
SMAD7	SMAD7	0	0.157	0	0	0.5	0
CRB2	CRB2	0	0.2838	0	0	0.5	0
PPP1R12B	PPP1R12B	0	0.4964	0.0017	0	0.5	0.0272763
TPO	TPO	0	0.2698	0.0005	0	0.5	0.00948106
RAVER2	RAVER2	0	0.5	0	0	0.5	0
C11H2orf68	C2orf68	0	0.5	0.0023	0	0.5	0.0354489
BEND7	BEND7	0	0.5	0.0004	0	0.5	0.00779751
CASD1	CASD1	0	0.5	0	0	0.5	0
C2CD2	C2CD2	0	0.5	0	0	0.5	0
ARSE	ARSL	0	0.1369	0	0	0.5	0
HABP4	HABP4	0	0.5	0.0004	0	0.5	0.00779751
EPHX4	EPHX4	0	0.5	0	0	0.5	0
NPDC1	NPDC1	0	0.5	0	0	0.5	0
ADAMTS13	ADAMTS13	0	0.5	0	0	0.5	0
RSAD2	RSAD2	0	0.3814	0	0	0.5	0
LEMD3	LEMD3	0	0.5	0.0001	0	0.5	0.00223882
ECHDC3	ECHDC3	0	0.5	0	0	0.5	0
FAM83F	FAM83F	0	0.5	0.0009	0	0.5	0.0157531
PALLD	PALLD	0.0008	0.2866	0.0008	0.00486965	0.5	0.0141612
TDG	TDG	0	0.5	0.0008	0	0.5	0.0141612
MARCKS	MARCKS	0	0.5	0	0	0.5	0
ACAD9	ACAD9	0	0.027	0.0001	0	0.135	0.00223882
ZPBP	ZPBP	0	0.5	0	0	0.5	0
EVX1	EVX1	0	0.5	0.0015	0	0.5	0.0243799
PDZRN4	PDZRN4	0	0.5	0	0	0.5	0
NSMCE4A	NSMCE4A	0	0.5	0	0	0.5	0
TPGS2	TPGS2	0	0.5	0.0013	0	0.5	0.0214072
SLC35A3	SLC35A3	0.0005	0.0128	0.0003	0.00316355	0.0722236	0.00602648
TSEN15	TSEN15	0.0007	0.5	0.0011	0.00431977	0.5	0.0186286
RTN4RL2	RTN4RL2	0	0.5	0	0	0.5	0
IER5L	IER5L	0	0.5	0.0018	0	0.5	0.0286239
LEMD2	LEMD2	0	0.5	0	0	0.5	0
CHST13	CHST13	0	0.0252	0	0	0.127942	0
VSTM2B	VSTM2B	0	0.4115	0.0004	0	0.5	0.00779751
TTPA	TTPA	0	0.5	0	0	0.5	0
CHADL	CHADL	0	0.3201	0.0003	0	0.5	0.00602648
RNPEP	RNPEP	0	0.5	0	0	0.5	0
ABCB10	ABCB10	0	0.5	0	0	0.5	0
SH2B3	SH2B3	0	0.0277	0	0	0.137839	0
MAPK14	MAPK14	0	0.5	0	0	0.5	0
TDRD3	TDRD3	0	0.5	0.0021	0	0.5	0.0326884
MOV10L1	MOV10L1	0	0.5	0.0003	0	0.5	0.00602648
DPYD	DPYD	0	0.1682	0.0013	0	0.5	0.0214072
DRD4	DRD4	0.0002	0.5	0	0.00134642	0.5	0
PTGDR2	PTGDR2	0	0.4457	0	0	0.5	0
PHETA1	PHETA1	0.0001	0.5	0	0.000699162	0.5	0
RBMXL2	RBMXL2	0	0.5	0	0	0.5	0
NET1	NET1	0	0.0103	0	0	0.0597887	0
C13H20orf194	DNAAF9	0	0.4126	0	0	0.5	0
HOXA4	HOXA4	0	0.5	0	0	0.5	0
TCFL5	TCFL5	0	0.5	0	0	0.5	0
MYCL	MYCL	0	0.5	0.0028	0	0.5	0.0421685
ZNF276	ZNF276	0	0.5	0	0	0.5	0
SOWAHC	SOWAHC	0	0.5	0	0	0.5	0
NANOS1	NANOS1	0	0.1169	0	0	0.442664	0
STK17A	STK17A	0	0.2676	0	0	0.5	0
HACD1	HACD1	0	0.3794	0	0	0.5	0
NKD2	NKD2	0	0.5	0	0	0.5	0
FIZ1	FIZ1	0	0.5	0	0	0.5	0
PPP1R14A	PPP1R14A	0	0.5	0	0	0.5	0
GLT1D1	GLT1D1	0	0.5	0	0	0.5	0
CPOX	CPOX	0	0.5	0	0	0.5	0
GALNT12	GALNT12	0	0.3773	0	0	0.5	0
GPR182	GPR182	0	0.5	0.0025	0	0.5	0.038109
CRTC2	CRTC2	0	0.5	0.0034	0	0.5	0.0498255
FBRSL1	FBRSL1	0	0.4788	0	0	0.5	0
GPR62	GPR62	0	0.5	0	0	0.5	0
PDSS1	PDSS1	0	0.0178	0.0019	0	0.0956492	0.0300234
TDRD9	TDRD9	0	0.5	0	0	0.5	0
KLF14	KLF14	0	0.2042	0	0	0.5	0
CKAP4	CKAP4	0	0.0746	0	0	0.310379	0
PLCB2	PLCB2	0	0.2422	0	0	0.5	0
HJV	HJV	0	0.5	0	0	0.5	0
WFDC1	WFDC1	0	0.5	0	0	0.5	0
TET3	TET3	0	0.5	0.0001	0	0.5	0.00223882
VPS37B	VPS37B	0	0.0347	0	0	0.166451	0
B4GALNT3	B4GALNT3	0	0.5	0	0	0.5	0
SEPT10	SEPTIN10	0	0.0838	0.0015	0	0.340727	0.0243799
DUSP22	DUSP22	0	0.5	0	0	0.5	0
ZDHHC20	ZDHHC20	0	0.5	0	0	0.5	0
BHLHE41	BHLHE41	0	0.0155	0	0	0.0851547	0
RB1CC1	RB1CC1	0	0.5	0	0	0.5	0
EPC1	EPC1	0	0.5	0	0	0.5	0
DGKQ	DGKQ	0	0.5	0.0019	0	0.5	0.0300234
SLC15A4	SLC15A4	0	0.4343	0	0	0.5	0
IKZF1	IKZF1	0	0.5	0	0	0.5	0
CCDC61	CCDC61	0	0.5	0.0009	0	0.5	0.0157531
RIN2	RIN2	0	0.4974	0.0018	0	0.5	0.0286239
LRIG3	LRIG3	0	0.1922	0	0	0.5	0
SPIRE1	SPIRE1	0	0.5	0	0	0.5	0
CABLES1	CABLES1	0	0.5	0.0008	0	0.5	0.0141612
FAM155B	NALF2	0	0.0282	0	0	0.139882	0
NRG3	NRG3	0	0.5	0	0	0.5	0
SELENOO	SELENOO	0	0.0256	0	0	0.1295	0
ABTB1	ABTB1	0	0.5	0	0	0.5	0
TMEM132D	TMEM132D	0	0.2594	0.0002	0	0.5	0.00420672
OCRL	OCRL	0	0.5	0	0	0.5	0
IRX3	IRX3	0	0.3006	0.0002	0	0.5	0.00420672
MAP7D1	MAP7D1	0	0.5	0	0	0.5	0
PAX2	PAX2	0.0001	0.1039	0.0004	0.000699162	0.402572	0.00779751
ZFYVE21	ZFYVE21	0	0.5	0.0006	0	0.5	0.0110752
CRTC3	CRTC3	0	0.5	0.0003	0	0.5	0.00602648
MYT1L	MYT1L	0	0.4968	0	0	0.5	0
GALR3	GALR3	0	0.3279	0	0	0.5	0
RALGAPA2	RALGAPA2	0	0.5	0.0006	0	0.5	0.0110752
IGFBP3	IGFBP3	0	0.01	0	0	0.058345	0
NECAB2	NECAB2	0	0.5	0	0	0.5	0
FAM101A	RFLNA	0	0.5	0.0002	0	0.5	0.00420672
RNF215	RNF215	0	0.5	0	0	0.5	0
LANCL2	LANCL2	0.0005	0.3975	0	0.00316355	0.5	0
TIAM2	TIAM2	0	0.0103	0	0	0.0597887	0
LAMA5	LAMA5	0	0.1931	0.0025	0	0.5	0.038109
ZBED1	ZBED1	0	0.5	0.0015	0	0.5	0.0243799
ME1	ME1	0	0.5	0	0	0.5	0
MTCL1	MTCL1	0	0.5	0.001	0	0.5	0.0171674
BRF1	BRF1	0	0.252	0.0007	0	0.5	0.0126414
PPP1R12C	PPP1R12C	0	0.0845	0	0	0.342793	0
OTUD1	OTUD1	0	0.5	0	0	0.5	0
LTBP1	LTBP1	0	0.5	0	0	0.5	0
NUDT14	NUDT14	0	0.5	0	0	0.5	0
ATP10A	ATP10A	0	0.0244	0	0	0.124792	0
BOP1	BOP1	0	0.1455	0	0	0.5	0
PDCD7	PDCD7	0	0.1911	0	0	0.5	0
FGF23	FGF23	0	0.5	0.0001	0	0.5	0.00223882
VWA1	VWA1	0	0.5	0	0	0.5	0
EIF2AK4	EIF2AK4	0	0.5	0	0	0.5	0
TTYH1	TTYH1	0.0015	0.5	0.0003	0.00857192	0.5	0.00602648
KDM7A	KDM7A	0	0.5	0	0	0.5	0
AKAP17A	AKAP17A	0	0.4519	0	0	0.5	0
C23H6orf106	ILRUN	0.0001	0.5	0.0003	0.000699162	0.5	0.00602648
JPH1	JPH1	0	0.4534	0.0033	0	0.5	0.0486449
MAFF	MAFF	0.0058	0.5	0.0003	0.0293874	0.5	0.00602648
HDHD5	HDHD5	0	0.0521	0	0	0.233955	0
IRF2BP2	IRF2BP2	0	0.5	0.0002	0	0.5	0.00420672
MMP11	MMP11	0	0.0981	0.0005	0	0.384625	0.00948106
PTGER4	PTGER4	0	0.5	0.0013	0	0.5	0.0214072
TCF7L2	TCF7L2	0	0.0524	0	0	0.235217	0
MXI1	MXI1	0	0.5	0	0	0.5	0
FAM189A1	FAM189A1	0	0.5	0	0	0.5	0
LPCAT4	LPCAT4	0	0.5	0.0013	0	0.5	0.0214072
SEMA4D	SEMA4D	0.0015	0.5	0.0005	0.00857192	0.5	0.00948106
GRK3	GRK3	0	0.0142	0	0	0.0789836	0
CLDN10	CLDN10	0	0.5	0.0003	0	0.5	0.00602648
TMEM132C	TMEM132C	0	0.4955	0	0	0.5	0
CNNM3	CNNM3	0	0.5	0	0	0.5	0
PLEKHG5	PLEKHG5	0	0.451	0	0	0.5	0
TNFSF11	TNFSF11	0	0.5	0.0003	0	0.5	0.00602648
PXN	PXN	0	0.1298	0.0028	0	0.480748	0.0421685
IRX1	IRX1	0	0.2542	0	0	0.5	0
MLXIP	MLXIP	0	0.5	0	0	0.5	0
ANO10	ANO10	0	0.5	0.0003	0	0.5	0.00602648
TCF20	TCF20	0	0.5	0	0	0.5	0
CERK	CERK	0	0.3017	0	0	0.5	0
HHIPL1	HHIPL1	0	0.0092	0	0	0.0542848	0
SLC22A3	SLC22A3	0	0.5	0	0	0.5	0
GXYLT1	GXYLT1	0	0.5	0	0	0.5	0
TYRO3	TYRO3	0	0.5	0.0017	0	0.5	0.0272763
GUCY1A2	GUCY1A2	0	0.5	0	0	0.5	0
MYCN	MYCN	0	0.5	0	0	0.5	0
MYPOP	MYPOP	0	0.5	0	0	0.5	0
RAX	RAX	0	0.5	0	0	0.5	0
RAPGEF5	RAPGEF5	0	0.0406	0	0	0.189522	0
GPR153	GPR153	0	0.5	0	0	0.5	0
PAPD5	TENT4B	0	0.5	0.0001	0	0.5	0.00223882
VAPB	VAPB	0.004	0.0108	0.0032	0.0208932	0.0622866	0.0473381
ATP2B4	ATP2B4	0	0.5	0	0	0.5	0
PARD3	PARD3	0	0.5	0	0	0.5	0
KCNQ3	KCNQ3	0	0.5	0.0006	0	0.5	0.0110752
ATXN10	ATXN10	0	0.1852	0	0	0.5	0
RRAGC	RRAGC	0	0.207	0	0	0.5	0
TEAD1	TEAD1	0	0.5	0	0	0.5	0
EPM2A	EPM2A	0	0.5	0	0	0.5	0
KMT5A	KMT5A	0	0.5	0	0	0.5	0
TRIM28	TRIM28	0	0.0263	0	0	0.132133	0
SHC3	SHC3	0	0.245	0	0	0.5	0
PTPRE	PTPRE	0	0.5	0	0	0.5	0
PRPF40B	PRPF40B	0	0.4936	0.0029	0	0.5	0.0434133
FAM98B	FAM98B	0	0.5	0.0026	0	0.5	0.0394891
TMEM201	TMEM201	0	0.5	0	0	0.5	0
OSBPL10	OSBPL10	0	0.5	0	0	0.5	0
NKAP	NKAP	0	0.5	0.0012	0	0.5	0.0200507
SHANK2	SHANK2	0	0.0549	0	0	0.244249	0
KCNS1	KCNS1	0	0.4585	0	0	0.5	0
KBTBD13	KBTBD13	0	0.5	0	0	0.5	0
ESYT2	ESYT2	0	0.4025	0	0	0.5	0
GDF10	GDF10	0.0002	0.5	0.0007	0.00134642	0.5	0.0126414
CLCF1	CLCF1	0	0.5	0	0	0.5	0
TBX2	TBX2	0	0.0612	0	0	0.26715	0
ZBTB22	ZBTB22	0	0.5	0.0001	0	0.5	0.00223882
GLRX3	GLRX3	0	0.5	0	0	0.5	0
GREB1L	GREB1L	0	0.5	0	0	0.5	0
ALDH2	ALDH2	0	0.5	0	0	0.5	0
EEFSEC	EEFSEC	0	0.3655	0	0	0.5	0
INPP5D	INPP5D	0	0.5	0.0015	0	0.5	0.0243799
ANKRD9	ANKRD9	0	0.1027	0	0	0.399407	0
VGLL2	VGLL2	0	0.5	0	0	0.5	0
NPBWR1	NPBWR1	0.003	0.5	0.0013	0.0160999	0.5	0.0214072
GFI1	GFI1	0	0.5	0	0	0.5	0
DUSP8	DUSP8	0	0.0123	0	0	0.0698749	0
EMC10	EMC10	0	0.2212	0	0	0.5	0
DPP6	DPP6	0	0.2816	0.0017	0	0.5	0.0272763
ZNRF2	ZNRF2	0.0001	0.5	0.0001	0.000699162	0.5	0.00223882
PHLPP2	PHLPP2	0	0.4465	0	0	0.5	0
ZSWIM5	ZSWIM5	0	0.5	0	0	0.5	0
ZNF219	ZNF219	0	0.5	0.0024	0	0.5	0.0368088
GSK3A	GSK3A	0	0.0361	0.0003	0	0.171915	0.00602648
PTDSS2	PTDSS2	0	0.5	0.0002	0	0.5	0.00420672
TULP4	TULP4	0	0.3063	0.0001	0	0.5	0.00223882
SMTNL2	SMTNL2	0.0064	0.5	0.0009	0.0321026	0.5	0.0157531
KMT2A	KMT2A	0	0.5	0	0	0.5	0
540871	#N/A	0	0.1081	0	0	0.415246	0
SCRT1	SCRT1	0	0.5	0	0	0.5	0
TMEM240	TMEM240	0.0001	0.5	0	0.000699162	0.5	0
DPY19L1	DPY19L1	0	0.3359	0	0	0.5	0
RELB	RELB	0	0.4054	0.0007	0	0.5	0.0126414
SALL3	SALL3	0	0.2858	0	0	0.5	0
COL6A1	COL6A1	0	0.5	0.0006	0	0.5	0.0110752
PLEKHA7	PLEKHA7	0	0.0301	0.0004	0	0.147495	0.00779751
CHRNA10	CHRNA10	0	0.5	0.0004	0	0.5	0.00779751
TCF7L1	TCF7L1	0	0.4781	0	0	0.5	0
ALG9	ALG9	0	0.5	0.0001	0	0.5	0.00223882
MMP23	MMP23B	0.0001	0.5	0.0012	0.000699162	0.5	0.0200507
LGR4	LGR4	0	0.5	0	0	0.5	0
ZNF746	ZNF746	0	0.5	0	0	0.5	0
INA	INA	0	0.2093	0	0	0.5	0
TOX3	TOX3	0.0003	0.5	0	0.00196365	0.5	0
SORT1	SORT1	0	0.5	0.0001	0	0.5	0.00223882
NPHP3	NPHP3	0	0.5	0	0	0.5	0
TSPAN9	TSPAN9	0.0096	0.1422	0.002	0.0461915	0.5	0.0313659
TPD52L2	TPD52L2	0	0.5	0.0001	0	0.5	0.00223882
ZNF787	ZNF787	0	0.5	0	0	0.5	0
GAREM1	GAREM1	0	0.5	0.0005	0	0.5	0.00948106
CELSR3	CELSR3	0	0.0692	0	0	0.293672	0
FOXF2	FOXF2	0	0.5	0	0	0.5	0
ABHD16B	ABHD16B	0	0.5	0	0	0.5	0
RPN1	RPN1	0	0.5	0	0	0.5	0
DEPTOR	DEPTOR	0	0.5	0	0	0.5	0
HPN	HPN	0	0.5	0.0003	0	0.5	0.00602648
MTMR1	MTMR1	0	0.5	0	0	0.5	0
TBC1D8	TBC1D8	0	0.5	0	0	0.5	0
SLC2A13	SLC2A13	0	0.5	0	0	0.5	0
HEPACAM	HEPACAM	0	0.2683	0	0	0.5	0
EDEM1	EDEM1	0	0.5	0.0001	0	0.5	0.00223882
KIF26B	KIF26B	0	0.5	0	0	0.5	0
NISCH	NISCH	0	0.1807	0.0025	0	0.5	0.038109
ARHGAP39	ARHGAP39	0	0.1843	0.0001	0	0.5	0.00223882
COL6A2	COL6A2	0.0002	0.3866	0.0004	0.00134642	0.5	0.00779751
SOX18	SOX18	0	0.3164	0	0	0.5	0
APBA2	APBA2	0	0.5	0	0	0.5	0
FNDC10	FNDC10	0	0.4641	0	0	0.5	0
TGFBR2	TGFBR2	0	0.0178	0	0	0.0956492	0
GATA6	GATA6	0	0.5	0	0	0.5	0
RBM10	RBM10	0	0.5	0.0021	0	0.5	0.0326884
SCUBE1	SCUBE1	0	0.2046	0.0007	0	0.5	0.0126414
VCPIP1	VCPIP1	0	0.5	0.0008	0	0.5	0.0141612
FOXO6	FOXO6	0	0.5	0	0	0.5	0
EP400	EP400	0	0.5	0	0	0.5	0
CCDC92	CCDC92	0	0.5	0.0027	0	0.5	0.0408098
GIGYF2	GIGYF2	0	0.5	0	0	0.5	0
GLUD1	GLUD1	0	0.5	0.0002	0	0.5	0.00420672
XKR4	XKR4	0	0.0507	0	0	0.2289	0
ATXN1	ATXN1	0	0.5	0	0	0.5	0
IMPDH1	IMPDH1	0	0.5	0.0002	0	0.5	0.00420672
RTN4R	RTN4R	0	0.5	0	0	0.5	0
A1CF	A1CF	0	0.5	0	0	0.5	0
MAP4K1	MAP4K1	0	0.5	0	0	0.5	0
CHST7	CHST7	0	0.5	0	0	0.5	0
ZMIZ2	ZMIZ2	0	0.5	0.0014	0	0.5	0.0229934
SKOR2	SKOR2	0	0.18	0	0	0.5	0
SLC24A3	SLC24A3	0	0.5	0	0	0.5	0
GLP1R	GLP1R	0	0.5	0.0009	0	0.5	0.0157531
SLC7A5	SLC7A5	0	0.5	0	0	0.5	0
AGAP1	AGAP1	0	0.4793	0	0	0.5	0
TPRG1L	TPRG1L	0	0.5	0	0	0.5	0
TTC39C	TTC39C	0	0.5	0	0	0.5	0
KCNQ1	KCNQ1	0	0.5	0	0	0.5	0
SCRT2	SCRT2	0.0001	0.4996	0	0.000699162	0.5	0
SACS	SACS	0	0.5	0.0006	0	0.5	0.0110752
SKOR1	SKOR1	0	0.5	0	0	0.5	0
PRKD1	PRKD1	0	0.5	0.0001	0	0.5	0.00223882
KIAA1147	DENND11	0	0.5	0	0	0.5	0
WTIP	WTIP	0	0.5	0	0	0.5	0
VAC14	VAC14	0	0.5	0.0016	0	0.5	0.0258041
ANO1	ANO1	0	0.5	0	0	0.5	0
RALBP1	RALBP1	0	0.5	0	0	0.5	0
CCKBR	CCKBR	0	0.5	0.0002	0	0.5	0.00420672
PDK3	PDK3	0	0.4365	0	0	0.5	0
PTCH1	PTCH1	0	0.5	0.0001	0	0.5	0.00223882
DLX6	DLX6	0.0068	0.5	0.0012	0.0339864	0.5	0.0200507
GLG1	GLG1	0	0.3561	0	0	0.5	0
ASTN2	ASTN2	0	0.5	0	0	0.5	0
PCSK6	PCSK6	0	0.5	0	0	0.5	0
DACT3	DACT3	0	0.5	0	0	0.5	0
ADCY5	ADCY5	0	0.5	0	0	0.5	0
PTPN9	PTPN9	0	0.2739	0	0	0.5	0
GCLM	GCLM	0	0.5	0	0	0.5	0
MEX3C	MEX3C	0	0.2129	0	0	0.5	0
SCX	SCX	0	0.5	0	0	0.5	0
PIK3R4	PIK3R4	0.0001	0.2583	0	0.000699162	0.5	0
CAND2	CAND2	0	0.5	0.0005	0	0.5	0.00948106
SMARCC1	SMARCC1	0	0.5	0	0	0.5	0
SEH1L	SEH1L	0	0.0093	0.0001	0	0.0547973	0.00223882
KIFC3	KIFC3	0	0.5	0.0001	0	0.5	0.00223882
TTC9	TTC9	0.0014	0.5	0	0.00807047	0.5	0
UCK1	UCK1	0	0.5	0	0	0.5	0
GPD1L	GPD1L	0	0.5	0.0003	0	0.5	0.00602648
WASF3	WASF3	0	0.0843	0.0008	0	0.342315	0.0141612
CSMD2	CSMD2	0	0.3274	0	0	0.5	0
AEBP2	AEBP2	0	0.5	0.0001	0	0.5	0.00223882
PRR12	PRR12	0	0.5	0	0	0.5	0
DAB2IP	DAB2IP	0	0.0342	0.0001	0	0.164684	0.00223882
SHISA6	SHISA6	0	0.4495	0.0001	0	0.5	0.00223882
IMPAD1	BPNT2	0	0.5	0.0001	0	0.5	0.00223882
PANX2	PANX2	0	0.5	0.003	0	0.5	0.0446433
ZBTB7C	ZBTB7C	0	0.5	0	0	0.5	0
ASAP2	ASAP2	0	0.5	0.0011	0	0.5	0.0186286
CABP1	CABP1	0	0.5	0	0	0.5	0
KLHL42	KLHL42	0	0.5	0.0009	0	0.5	0.0157531
SHANK1	SHANK1	0	0.5	0	0	0.5	0
IPO9	IPO9	0	0.5	0.0009	0	0.5	0.0157531
CHSY1	CHSY1	0	0.5	0	0	0.5	0
CBX4	CBX4	0	0.5	0	0	0.5	0
MRGBP	MRGBP	0	0.0548	0	0	0.243978	0
KCNQ4	KCNQ4	0	0.5	0	0	0.5	0
DENND5B	DENND5B	0	0.5	0	0	0.5	0
VWC2	VWC2	0.0003	0.5	0	0.00196365	0.5	0
SHANK3	SHANK3	0	0.5	0	0	0.5	0
FRMD4A	FRMD4A	0	0.5	0	0	0.5	0
CACNA2D2	CACNA2D2	0	0.0174	0.0004	0	0.0940246	0.00779751
PLCL2	PLCL2	0	0.5	0	0	0.5	0
AMFR	AMFR	0	0.5	0	0	0.5	0
CPEB3	CPEB3	0	0.5	0	0	0.5	0
XPO4	XPO4	0.0076	0.5	0.003	0.0374907	0.5	0.0446433
AFG3L2	AFG3L2	0	0.5	0	0	0.5	0
CLPTM1	CLPTM1	0	0.5	0.0012	0	0.5	0.0200507
ATRNL1	ATRNL1	0	0.5	0	0	0.5	0
TAF4	TAF4	0	0.5	0.0018	0	0.5	0.0286239
POMGNT2	POMGNT2	0	0.5	0.0001	0	0.5	0.00223882
HOXA11	HOXA11	0	0.5	0	0	0.5	0
DYRK1A	DYRK1A	0	0.5	0	0	0.5	0
SKI	SKI	0	0.5	0	0	0.5	0
TMEM145	TMEM145	0	0.5	0	0	0.5	0
BCL11B	BCL11B	0	0.5	0	0	0.5	0
CELF6	CELF6	0	0.5	0	0	0.5	0
CALB2	CALB2	0.0001	0.5	0.0003	0.000699162	0.5	0.00602648
SLC6A8	SLC6A8	0	0.0664	0	0	0.285076	0
PRKAA2	PRKAA2	0	0.5	0	0	0.5	0
NOVA2	NOVA2	0	0.0112	0	0	0.0642383	0
TNNI2	TNNI2	0	0.0962	0	0	0.378718	0
USF2	USF2	0	0.4586	0	0	0.5	0
MECP2	MECP2	0	0.5	0.0005	0	0.5	0.00948106
GATA4	GATA4	0	0.5	0	0	0.5	0
MCU	MCU	0.0005	0.1548	0.0012	0.00316355	0.5	0.0200507
GPSM1	GPSM1	0	0.5	0.0001	0	0.5	0.00223882
GDF11	GDF11	0	0.5	0.0018	0	0.5	0.0286239
GARNL3	GARNL3	0	0.3127	0	0	0.5	0
SMARCC2	SMARCC2	0	0.5	0	0	0.5	0
MYH7	MYH7	0	0.1577	0.0016	0	0.5	0.0258041
LRFN1	LRFN1	0	0.3142	0	0	0.5	0
TRPV4	TRPV4	0	0.5	0.0004	0	0.5	0.00779751
NCK2	NCK2	0	0.5	0	0	0.5	0
KCNQ2	KCNQ2	0	0.5	0	0	0.5	0
DMWD	DMWD	0	0.5	0	0	0.5	0
KLHL25	KLHL25	0.0004	0.5	0	0.00257114	0.5	0
DEAF1	DEAF1	0	0.5	0.0002	0	0.5	0.00420672
CCM2L	CCM2L	0	0.0769	0.0007	0	0.31815	0.0126414
RYK	RYK	0	0.5	0	0	0.5	0
GALNT2	GALNT2	0	0.0273	0	0	0.136282	0
TPP2	TPP2	0	0.5	0	0	0.5	0
SPSB4	SPSB4	0	0.5	0.0031	0	0.5	0.0459674
SRSF9	SRSF9	0	0.2727	0.0001	0	0.5	0.00223882
GRIN2D	GRIN2D	0	0.5	0	0	0.5	0
ZBTB12	ZBTB12	0	0.2405	0	0	0.5	0
GRIK4	GRIK4	0	0.5	0	0	0.5	0
DOCK1	DOCK1	0	0.5	0.0007	0	0.5	0.0126414
SULT4A1	SULT4A1	0.0006	0.5	0.0003	0.00374141	0.5	0.00602648
DTX1	DTX1	0	0.5	0	0	0.5	0
LRP1	LRP1	0	0.5	0.0003	0	0.5	0.00602648
RRAS2	RRAS2	0.0046	0.295	0	0.0237888	0.5	0
ZNF521	ZNF521	0	0.4093	0.0009	0	0.5	0.0157531
LANCL3	LANCL3	0	0.5	0	0	0.5	0
GPR27	GPR27	0	0.5	0	0	0.5	0
POU4F2	POU4F2	0	0.5	0	0	0.5	0
ANGPTL2	ANGPTL2	0	0.5	0	0	0.5	0
CKB	CKB	0	0.5	0.0012	0	0.5	0.0200507
FOXL2	FOXL2	0	0.5	0	0	0.5	0
TRIM71	TRIM71	0	0.2443	0	0	0.5	0
ELFN2	ELFN2	0	0.4727	0	0	0.5	0
PTOV1	PTOV1	0	0.5	0	0	0.5	0
DSCAML1	DSCAML1	0	0.5	0	0	0.5	0
PTPRT	PTPRT	0	0.5	0	0	0.5	0
RAB12	RAB12	0	0.5	0	0	0.5	0
ZNF423	ZNF423	0	0.5	0.0007	0	0.5	0.0126414
GALNT9	GALNT9	0.0002	0.5	0	0.00134642	0.5	0
SOX10	SOX10	0	0.5	0	0	0.5	0
SLC8A2	SLC8A2	0.0007	0.5	0.001	0.00431977	0.5	0.0171674
NTRK3	NTRK3	0	0.5	0	0	0.5	0
ZMIZ1	ZMIZ1	0	0.5	0.0011	0	0.5	0.0186286
LRRC4C	LRRC4C	0.0023	0.5	0.0002	0.0126303	0.5	0.00420672
NELFCD	NELFCD	0	0.5	0	0	0.5	0
BTBD6	BTBD6	0	0.5	0.0006	0	0.5	0.0110752
PABPN1	PABPN1	0	0.5	0	0	0.5	0
MEX3A	MEX3A	0	0.5	0	0	0.5	0
POLR2F	POLR2F	0.0001	0.1657	0.0006	0.000699162	0.5	0.0110752
KLHDC10	KLHDC10	0	0.4739	0	0	0.5	0
HOXA13	HOXA13	0	0.5	0	0	0.5	0
GNAQ	GNAQ	0	0.4111	0	0	0.5	0
CYP26B1	CYP26B1	0	0.5	0.0011	0	0.5	0.0186286
UHMK1	UHMK1	0	0.5	0.0001	0	0.5	0.00223882
RPSA	RPSA	0	0.5	0.0006	0	0.5	0.0110752
TUBB3	TUBB3	0	0.5	0	0	0.5	0
SERP2	SERP2	0	0.5	0	0	0.5	0
PBX1	PBX1	0	0.5	0.0001	0	0.5	0.00223882
ARL8A	ARL8A	0	0.5	0	0	0.5	0

## Sheet: Tables5
Table.S5 The convergent GO terms of convergent positively selected genes between Camelus and Hippotraginae
ID	#Term	Database	ID	Input number	Background number	P-Value	Corrected P-Value	Input
hsa04261	Adrenergic signaling in cardiomyocytes	KEGG PATHWAY	hsa04261	9	149	0.000268672	0.00905397	ADCY5|PLCB2|MYH7|KCNQ1|MAPK14|CACNA2D2|SLC8A2|ATP2B4|GNAQ
hsa04927	Cortisol synthesis and secretion	KEGG PATHWAY	hsa04927	6	65	0.000356534	0.0111738	ADCY5|PLCB2|GNAQ|CYP21A2|PDE8A|PBX1
hsa01100	Metabolic pathways	KEGG PATHWAY	hsa01100	35	1433	0.000638299	0.0157514	OCRL|RPN1|PTDSS2|ALG9|CKB|CHSY1|GPLD1|ME1|GCLM|DPYD|DGKQ|IMPDH1|CYP26B1|TPO|LPCAT4|GUCY1A2|MTMR1|HSD11B1|PLCB2|UCK1|CYP21A2|B4GALNT3|CPOX|GALNT9|GALNT12|NAT8L|PDE8A|GALNT2|HACD1|ADCY5|INPP5D|POMGNT2|ALDH2|CRLS1|HLCS
hsa00564	Glycerophospholipid metabolism	KEGG PATHWAY	hsa00564	6	97	0.00250044	0.0350343	PTDSS2|CKB|DGKQ|LPCAT4|CRLS1|GPD1L
hsa04270	Vascular smooth muscle contraction	KEGG PATHWAY	hsa04270	7	132	0.00256804	0.0351451	ADCY5|PLCB2|GNAQ|GUCY1A2|PPP1R12B|PPP1R12C|PPP1R14A
hsa04925	Aldosterone synthesis and secretion	KEGG PATHWAY	hsa04925	6	98	0.00262453	0.0357621	ADCY5|PLCB2|GNAQ|CYP21A2|ATP2B4|PRKD1
hsa04924	Renin secretion	KEGG PATHWAY	hsa04924	5	69	0.00299968	0.0385286	PTGER4|ADCY5|PLCB2|GUCY1A2|GNAQ
GO:0001658	branching involved in ureteric bud morphogenesis	Gene Ontology	GO:0001658	6	42	3.9447e-05	0.00221277	LAMA5|PBX1|HOXA11|PAX2|PTCH1|GREB1L
GO:0097009	energy homeostasis	Gene Ontology	GO:0097009	5	35	0.000176774	0.00675623	TRPV4|CRTC3|MEX3C|IRX3|PRKAA2
GO:0042593	glucose homeostasis	Gene Ontology	GO:0042593	8	115	0.000239122	0.00851602	PRKAA2|TCF7L2|PDK3|CRTC2|FOXO6|TRPV4|MCU|PTCH1
GO:0006874	cellular calcium ion homeostasis	Gene Ontology	GO:0006874	7	98	0.000501724	0.0140393	DRD4|VAPB|SCYL3|TRPV4|SLC24A3|SLC8A2|ATP2B4
GO:0001656	metanephros development	Gene Ontology	GO:0001656	4	29	0.000906945	0.0193358	GREB1L|IRX3|HOXA11|GDF11
GO:0007204	positive regulation of cytosolic calcium ion concentration	Gene Ontology	GO:0007204	8	146	0.00106327	0.0220681	CCKBR|ADCY5|LRP1|PROK2|PTGER4|CHRNA10|GLP1R|TRPV4
GO:0014898	cardiac muscle hypertrophy in response to stress	Gene Ontology	GO:0014898	3	14	0.00135519	0.0261944	OCRL|GATA6|MYH7
GO:0035774	positive regulation of insulin secretion involved in cellular response to glucose stimulus	Gene Ontology	GO:0035774	4	34	0.00155318	0.0276922	LRP1|GPLD1|ANO1|GPR27
GO:0005249	voltage-gated potassium channel activity	Gene Ontology	GO:0005249	5	60	0.00169411	0.0280917	KCNS1|KCNQ4|KCNQ2|KCNQ3|KCNQ1
GO:0071333	cellular response to glucose stimulus	Gene Ontology	GO:0071333	5	60	0.00169411	0.0280917	PDK3|GCLM|GATA4|PRKAA2|PAX2
GO:0071805	potassium ion transmembrane transport	Gene Ontology	GO:0071805	7	123	0.00175852	0.0288544	KCNQ4|KCNQ2|KCNQ3|KCNQ1|KCNS1|SLC24A3|HPN
GO:0098703	calcium ion import across plasma membrane	Gene Ontology	GO:0098703	3	16	0.00189366	0.0299796	TRPV4|SLC8A2|ATP2B4
GO:0001570	vasculogenesis	Gene Ontology	GO:0001570	5	62	0.00193867	0.0302278	EGFL7|SOX18|ZMIZ1|BRF1|TGFBR2
GO:0005229	intracellular calcium activated chloride channel activity	Gene Ontology	GO:0005229	3	17	0.00220613	0.0330814	ANO1|ANO10|TTYH1
GO:0003007	heart morphogenesis	Gene Ontology	GO:0003007	4	39	0.00246552	0.0350343	COL5A1|ZMIZ1|PTCH1|ALPK2
GO:0045766	positive regulation of angiogenesis	Gene Ontology	GO:0045766	7	131	0.00246613	0.0350343	TGFBR2|SIRT1|EMC10|GATA6|GATA4|TERT|PRKD1
GO:0001568	blood vessel development	Gene Ontology	GO:0001568	4	41	0.00291567	0.0377988	EGFL7|TGFBR2|COL5A1|TCF7L2
GO:0051480	regulation of cytosolic calcium ion concentration	Gene Ontology	GO:0051480	4	41	0.00291567	0.0377988	SLC8A2|CALB2|ATP2B4|TMEM64
GO:0010875	positive regulation of cholesterol efflux	Gene Ontology	GO:0010875	3	20	0.00332818	0.0403763	SIRT1|PTCH1|LRP1
GO:1990569	UDP-N-acetylglucosamine transmembrane transport	Gene Ontology	GO:1990569	2	5	0.00349583	0.0403763	SLC35D2|SLC35A3
GO:0005462	UDP-N-acetylglucosamine transmembrane transporter activity	Gene Ontology	GO:0005462	2	5	0.00349583	0.0403763	SLC35D2|SLC35A3
GO:0120163	negative regulation of cold-induced thermogenesis	Gene Ontology	GO:0120163	4	47	0.0045963	0.0482684	NOVA2|PLCL2|ZNF423|LGR4
GO:1904179	positive regulation of adipose tissue development	Gene Ontology	GO:1904179	2	6	0.00462046	0.0482684	SH3PXD2B|SIRT1

## Sheet: Tables6
Table.S6 The convergent gene with parallel amino acid substitutions at conserved sites detected by PCOC, Conv_cal and CSUBST method with a series of standard in 25 pairwise comparison and 7 control groups
Gene id	Cattle id	Cattle name	Human id	Human name	site	pcoc	site				state	foreground1	foreground2	group	expcon	pvalue	padj	convergence-omegaCany2spe	discordant convergence -omegaCdif2spe	profile convergence-omegaCspe2any	profile convergence-omegaCspe2dif	congruent convergence-omegaCspe2spe	MAX
rna12458	539550	NPC1L1	29881	NPC1L1	516	0.999865	515	V	V	A	is_ccs1	Gemsbok,ScimitarHornedOryx,addaxhosomaodatus	ArabianCamel,Bactriancamel,WildBactrianCamel	fore	0.0442744	0.000951656	0.0474963	21476.2	149.158	2052.67	0.1583	22803.8	22803.8
rna12458	539550	NPC1L1	29881	NPC1L1	907	0.998902	906	D	D	N	is_ccs1	Gemsbok,ScimitarHornedOryx,addaxhosomaodatus	ArabianCamel,Bactriancamel,WildBactrianCamel	fore	0.0442744	0.000951656	0.0474963	21476.2	149.158	2052.67	0.1583	22803.8	22803.8
rna12671	539985	GCC1	79571	GCC1	628	0.999139	627	E	E	D	is_ccs1	Gemsbok,ScimitarHornedOryx,addaxhosomaodatus	ArabianCamel,Bactriancamel,WildBactrianCamel	fore	0.0381503	0.0374317	0.0997367	57713.3	31.3808	6721.43	0	57876	57876
rna13547	511899	INSIG1	3638	INSIG1	138	0.999637	137	R	R	H	is_ccs1	Gemsbok,ScimitarHornedOryx,addaxhosomaodatus	ArabianCamel,Bactriancamel,WildBactrianCamel	fore	0.0175838	0.0174301	0.0771704	40424	19.861	9251.53	0.5335	49536.7	49536.7
rna14685	517876	ARID2	196528	ARID2	1308	0.998434	1307	I	I	V	is_ccs1	Gemsbok,ScimitarHornedOryx,addaxhosomaodatus	ArabianCamel,Bactriancamel,WildBactrianCamel	fore	0.0209101	0.020693	0.0799659	160470	0	53379.9	543.322	206111	206111
rna16907	525377	CRACR2A	84766	CRACR2A	314	0.999899	313	V	V	T,A	is_ccs1	Gemsbok,ScimitarHornedOryx,addaxhosomaodatus	ArabianCamel,Bactriancamel,WildBactrianCamel	fore	0.0879787	0.00365045	0.0626013	22.3826	0.3504	5.0304	33.9574	25.3714	33.9574
rna30669	614323	CA12	771	CA12	304	0.99853	303	V	V	L,I	is_ccs1	Gemsbok,ScimitarHornedOryx,addaxhosomaodatus	ArabianCamel,Bactriancamel,WildBactrianCamel	fore	0.00663184	0.0066099	0.0674215	36.635	8829.9	15.4192	0	34.4714	8829.9
rna30842	532884	MNS1	55329	MNS1	392	0.999184	391	Q	Q	R	is_ccs1	Gemsbok,ScimitarHornedOryx,addaxhosomaodatus	ArabianCamel,Bactriancamel,WildBactrianCamel	fore	0.0174924	0.0173403	0.0771704	7201.48	3759.02	3252.92	0	9615.92	9615.92
rna36004	534712	RB1	5925	RB1	802	0.999813	801	A	A	V	is_ccs1	Gemsbok,ScimitarHornedOryx,addaxhosomaodatus	ArabianCamel,Bactriancamel,WildBactrianCamel	fore	0.0176554	0.0175005	0.0771709	4915.7	0	1534.15	0	5884.53	5884.53
rna40579	511990	PHF20L1	51105	PHF20L1	844	0.998546	843	R	R	K	is_ccs1	Gemsbok,ScimitarHornedOryx,addaxhosomaodatus	ArabianCamel,Bactriancamel,WildBactrianCamel	fore	0.0141021	0.0140031	0.0741515	43683.8	82.8013	10111.3	0	35660.7	43683.8
rna41733	513789	WWP1	11059	WWP1	179	0.998146	178	V	V	I	is_ccs1	Gemsbok,ScimitarHornedOryx,addaxhosomaodatus	ArabianCamel,Bactriancamel,WildBactrianCamel	fore	0.014572	0.0144663	0.0749245	33.5564	0.306	6.9719	0.0015	37.443	37.443
rna42785	519803	AMPD3	272	AMPD3	104	0.999665	103	T	T	A	is_ccs1	Gemsbok,ScimitarHornedOryx,addaxhosomaodatus	ArabianCamel,Bactriancamel,WildBactrianCamel	fore	0.0119126	0.0118419	0.0710515	2448.7	9.5419	469.613	0.0067	2681.58	2681.58
rna45372	783955	METTL18	92342	METTL18	256	0.999734	255	T	T	A,V	is_ccs1	Gemsbok,ScimitarHornedOryx,addaxhosomaodatus	ArabianCamel,Bactriancamel,WildBactrianCamel	fore	0.0377597	0.0370557	0.0997256	61488.9	260.178	18889.6	0	65836.4	65836.4
rna47245	540830	HHIP	64399	HHIP	67	0.999923	66	P	P	L	is_ccs1	Gemsbok,ScimitarHornedOryx,addaxhosomaodatus	ArabianCamel,Bactriancamel,WildBactrianCamel	fore	0.00864408	0.00860683	0.0674215	67.1641	16.9774	12.3021	0	64.1583	67.1641
rna48127	518844	BRAP	8315	BRAP	506	0.998546	505	R	R	K	is_ccs1	Gemsbok,ScimitarHornedOryx,addaxhosomaodatus	ArabianCamel,Bactriancamel,WildBactrianCamel	fore	0.0245748	0.0242753	0.0845382	157168	55.3997	1892.64	0	149538	157168
rna66744	616033	NARS	4677	NARS	414	0.999175	413	D	D	S,N	is_ccs1	Gemsbok,ScimitarHornedOryx,addaxhosomaodatus	ArabianCamel,Bactriancamel,WildBactrianCamel	fore	0.00581703	0.00580014	0.0674215	1239.83	45.1756	248.436	0	1008.49	1239.83
rna72373	369025	PRF1	5551	PRF1	173	0.999572	172	Y	Y	H	is_ccs1	Gemsbok,ScimitarHornedOryx,addaxhosomaodatus	ArabianCamel,Bactriancamel,WildBactrianCamel	fore	0.0385685	0.0378342	0.0999409	1998.25	0.4404	425.987	0.077	1994.85	1998.25
rna77815	515927	TXLNG	55787	TXLNG	72	0.999184	71	Q	Q	R	is_ccs1	Gemsbok,ScimitarHornedOryx,addaxhosomaodatus	ArabianCamel,Bactriancamel,WildBactrianCamel	fore	0.0155286	0.0154086	0.0757153	879.797	0.0179	262.777	0.7741	1436.48	1436.48
rna45744	523474	NOL9	79707	NOL9	343	0.999984	342	S	S	F,L	is_ccs1	Gemsbok,ScimitarHornedOryx,addaxhosomaodatus	ArabianCamel,Bactriancamel,WildBactrianCamel	fore	0.00698238	0.00695806	0.0674215	80.8895	29875.6	0.8959	0.0023	3.5868	29875.6
rna11183	524650	LOC524650	79645	EFCAB1	60	0.998984	59	E	N	D	is_ccs2	Gemsbok,ScimitarHornedOryx,addaxhosomaodatus	ArabianCamel,Bactriancamel,WildBactrianCamel	fore	0.021432	0.021204	0.0805604	0	0	604094	inf	0	604094
rna13609	516644	NCAPG2	54892	NCAPG2	24	0.999367	23	E	R	Q	is_ccs2	Gemsbok,ScimitarHornedOryx,addaxhosomaodatus	ArabianCamel,Bactriancamel,WildBactrianCamel	fore	0.0279091	0.0275232	0.0883502	0.4893	0	165.869	477.165	0.4798	477.165
rna16717	515361	LPCAT3	10162	LPCAT3	442	0.999601	441	V	T	M	is_ccs2	Gemsbok,ScimitarHornedOryx,addaxhosomaodatus	ArabianCamel,Bactriancamel,WildBactrianCamel	fore	0.0382143	0.0374933	0.0997367	0	0	4297.05	7.90228e+07	0	7.90228e+07
rna30379	532556	MGA	23269	MGA	2149	0.999142	2148	V	V	L,A	is_ccs1	Gemsbok,ScimitarHornedOryx,addaxhosomaodatus	ArabianCamel,Bactriancamel,WildBactrianCamel	fore	0.0242989	0.0240061	0.0842129	1010.66	1206.03	71.0409	31.1124	278.971	1206.03
rna36641	514162	BORA	79866	BORA	259	0.999524	258	L	A	V	is_ccs2	Gemsbok,ScimitarHornedOryx,addaxhosomaodatus	ArabianCamel,Bactriancamel,WildBactrianCamel	fore	0.0207788	0.0205644	0.0799659	0.2193	0	327.158	67671	0.2493	67671
rna39208	514295	COMMD7	149951	COMMD7	219	0.999636	218	H	H	G,R,D	is_ccs1	Gemsbok,ScimitarHornedOryx,addaxhosomaodatus	ArabianCamel,Bactriancamel,WildBactrianCamel	fore	0.00386588	0.00385842	0.0626013	1.09706e+06	48051.1	4.2856	0	2.93972e+06	2.93972e+06
rna46084	513692	SPEN	23013	SPEN	998	0.998137	997	S	S	C,G	is_ccs1	Gemsbok,ScimitarHornedOryx,addaxhosomaodatus	ArabianCamel,Bactriancamel,WildBactrianCamel	fore	0.0266191	0.0262679	0.087817	754.887	2318.52	0.0933	0.0006	105.221	2318.52
rna46429	522344	RGL1	23179	RGL1	23	0.999469	22	G	D	E	is_ccs2	Gemsbok,ScimitarHornedOryx,addaxhosomaodatus	ArabianCamel,Bactriancamel,WildBactrianCamel	fore	0.00577145	0.00575483	0.0674215	0.0032	0	585.171	9510.28	0.0047	9510.28
rna48816	523783	SLC35E4	339665	SLC35E4	185	0.999649	184	C	H	R	is_ccs2	Gemsbok,ScimitarHornedOryx,addaxhosomaodatus	ArabianCamel,Bactriancamel,WildBactrianCamel	fore	0.0369292	0.0362557	0.0993263	0	0	24923.8	17010.8	0	24923.8
rna51408	534859	B3GNT8	374907	B3GNT8	265	0.999521	264	S	V	G	is_ccs2	Gemsbok,ScimitarHornedOryx,addaxhosomaodatus	ArabianCamel,Bactriancamel,WildBactrianCamel	fore	0.0277936	0.0274109	0.0883502	0.9224	0.131	438.03	270.266	2.0717	438.03
rna51871	532062	PNMA8A	55228	PNMAL1	281	0.999128	280	E	R	K	is_ccs2	Gemsbok,ScimitarHornedOryx,addaxhosomaodatus	ArabianCamel,Bactriancamel,WildBactrianCamel	fore	0.0286128	0.0282074	0.0883502	3.7661	29.5085	161.349	752.971	0.0001	752.971
rna58353	282354	SLC1A3	6507	SLC1A3	173	0.99943	172	R	H	Q	is_ccs2	Gemsbok,ScimitarHornedOryx,addaxhosomaodatus	ArabianCamel,Bactriancamel,WildBactrianCamel	fore	0.0165942	0.0164573	0.0765681	0	0	14784.3	2.56536e+07	0	2.56536e+07
rna61750	783484	MAGI1	9223	MAGI1	399	0.999324	398	P	T	S	is_ccs2	Gemsbok,ScimitarHornedOryx,addaxhosomaodatus	ArabianCamel,Bactriancamel,WildBactrianCamel	fore	0.0143041	0.0142023	0.0741515	0	0.0002	2.5101	246986	0	246986
rna64124	537922	TNFRSF21	27242	TNFRSF21	199	0.999649	198	P	R	H	is_ccs2	Gemsbok,ScimitarHornedOryx,addaxhosomaodatus	ArabianCamel,Bactriancamel,WildBactrianCamel	fore	0.0261749	0.0258353	0.0874519	0	0	1.7239	5397.3	0	5397.3
rna72767	100336125	C28H10orf99	387695	C10orf99	65	0.998611	64	T	T	P,K,S,Q	is_ccs1	Gemsbok,ScimitarHornedOryx,addaxhosomaodatus	ArabianCamel,Bactriancamel,WildBactrianCamel	fore	0.0288131	0.028402	0.0883502	137997	1.78294e+07	1509.92	0.002	9448.86	1.78294e+07
rna7739	286846	PI4KB	5298	PI4KB	11	0.99968	10	V	T	A	is_ccs2	Gemsbok,ScimitarHornedOryx,addaxhosomaodatus	ArabianCamel,Bactriancamel,WildBactrianCamel	fore	0.00431821	0.0043089	0.0630823	0	0	3395.78	4248.35	0	4248.35
rna8177	514870	WDR3	10885	WDR3	727	0.999051	726	G	E	D	is_ccs2	Gemsbok,ScimitarHornedOryx,addaxhosomaodatus	ArabianCamel,Bactriancamel,WildBactrianCamel	fore	0.0335255	0.0329697	0.0937844	0	0	27.55	17601.1	0	17601.1
rna28434	615418	ADAT2	134637	ADAT2	86	0.999977	85	H	H	Q,R,G	is_ccs1	Gemsbok,ScimitarHornedOryx	ArabianCamel,Bactriancamel,WildBactrianCamel	fore	0.00347065	0.00346463	0.0626013	22634.1	424.741	444.509	2.4004	20123.5	22634.1
rna38847	506751	LAMA5	3911	LAMA5	283	0.999969	282	H	H	R	is_ccs1	Gemsbok,ScimitarHornedOryx	ArabianCamel,Bactriancamel,WildBactrianCamel	fore	0.0191957	0.0190126	0.0784806	71.6025	23.9887	29.8188	139.272	74.4157	139.272
rna42982	515576	DCHS1	8642	DCHS1	2276	0.999973	2275	T	T	A	is_ccs1	Gemsbok,ScimitarHornedOryx	ArabianCamel,Bactriancamel,WildBactrianCamel	fore	0.00689332	0.00686962	0.0674215	2.9807	0.0476	0.6711	0.9176	2.2416	2.9807
rna45236	504716	AHCTF1	25909	AHCTF1	1214	0.999996	1213	D	D	C,R,H	is_ccs1	Gemsbok,ScimitarHornedOryx	ArabianCamel,Bactriancamel,WildBactrianCamel	fore	0.0123596	0.0122835	0.0717707	23.0562	0.0135	11.3407	9.478	32.6885	32.6885
rna46248	538320	PAPPA2	60676	PAPPA2	1376	0.999973	1375	T	T	A	is_ccs1	Gemsbok,ScimitarHornedOryx	ArabianCamel,Bactriancamel,WildBactrianCamel	fore	0.0139043	0.0138081	0.073921	0.0695	0.0536	0.0181	3.8114	0.0726	3.8114
rna46381	614467	TEDDM1	127670	TEDDM1	265	0.99996	264	T	T	A,S	is_ccs1	Gemsbok,ScimitarHornedOryx	ArabianCamel,Bactriancamel,WildBactrianCamel	fore	0.0288738	0.0284609	0.0883502	2.441	3.2671	0.5496	0.0203	2.5252	3.2671
rna40174	493733	FOXH1	8928	FOXH1	186	0.999992	185	H	H	R,G,P,S	is_ccs1	Gemsbok,ScimitarHornedOryx	ArabianCamel,Bactriancamel,WildBactrianCamel	fore	0	0	0	42039.7	19523.3	448.054	0.0026	42173.7	42173.7
rna50876	618180	FFAR1	2864	FFAR1	210	0.99998	209	G	G	R,H,A	is_ccs1	Gemsbok,ScimitarHornedOryx	ArabianCamel,Bactriancamel,WildBactrianCamel	fore	0	0	0	79535.8	88.8211	12.264	3.4677	379344	379344
rna65515	505355	ECI2	10455	ECI2	224	0.999992	223	T	T	L,I,M,A,V	is_ccs1	Gemsbok,ScimitarHornedOryx	ArabianCamel,Bactriancamel,WildBactrianCamel	fore	0.00338472	0.003379	0.0626013	0.0704	1.3974	4.2254	1583.84	0.0368	1583.84
rna73998	404162	B3GAT3	26229	B3GAT3	123	0.999984	122	V	E	G	is_ccs2	Gemsbok,ScimitarHornedOryx	ArabianCamel,Bactriancamel,WildBactrianCamel	fore	0.0260925	0.025755	0.0874519	0.069	1.3089	0.9641	12.232	0.0028	12.232
rna13954	509239	TMCC3	57458	TMCC3	333	0.999885	332	Q	Q	C,H,Y	is_ccs1	ScimitarHornedOryx	ArabianCamel,Bactriancamel,WildBactrianCamel	fore	0.014352	0.0142495	0.0741515	2.90746e+07	6.71599e+06	4257.53	0	3.73351e+07	3.73351e+07
rna2850	518043	DIP2A	23181	DIP2A	256	0.999963	255	I	I	T,V,A	is_ccs1	ScimitarHornedOryx	ArabianCamel,Bactriancamel,WildBactrianCamel	fore	0.00182162	0.00181996	0.0595674	68077.4	17911.3	14095.4	0	52804.5	68077.4
rna35662	100036592	FUT7	2529	FUT7	122	0.99995	121	T	T	A	is_ccs1	ScimitarHornedOryx	ArabianCamel,Bactriancamel,WildBactrianCamel	fore	0.00884024	0.00880128	0.0674215	801338	1415.45	45945.9	0	1.33445e+06	1.33445e+06
rna47835	100847550	DNAH10	196385	DNAH10	1591	0.999981	1590	T	T	I	is_ccs1	ScimitarHornedOryx	ArabianCamel,Bactriancamel,WildBactrianCamel	fore	0.0132131	0.0131261	0.0731015	166467	10.7091	38561.7	0	1.22485e+07	1.22485e+07
rna48104	524491	CUX2	23316	CUX2	872	0.999946	871	M	M	V	is_ccs1	ScimitarHornedOryx	ArabianCamel,Bactriancamel,WildBactrianCamel	fore	0.00735947	0.00733246	0.0674215	307.032	134.56	83.2571	0	285.919	307.032
rna486	523482	ADGRG7	84873	ADGRG7	173	0.999981	172	T	T	I	is_ccs1	ScimitarHornedOryx	ArabianCamel,Bactriancamel,WildBactrianCamel	fore	0.0226737	0.0224185	0.0823263	6579.84	2.9635	14658	inf	43410.9	43410.9
rna50991	530449	WDR62	284403	WDR62	903	0.999839	902	S	S	G,T	is_ccs1	ScimitarHornedOryx	ArabianCamel,Bactriancamel,WildBactrianCamel	fore	0.0232028	0.0229357	0.0833731	417878	1972.61	1083.94	0	410080	417878
rna63311	512383	KLHL31	401265	KLHL31	31	0.999949	30	S	S	N	is_ccs1	ScimitarHornedOryx	ArabianCamel,Bactriancamel,WildBactrianCamel	fore	0.00321688	0.00321171	0.0626013	260391	inf	63994.9	0	227315	260391
rna76349	511602	COL4A5	1287	COL4A5	1400	0.999942	1399	H	H	R	is_ccs1	ScimitarHornedOryx	ArabianCamel,Bactriancamel,WildBactrianCamel	fore	0.0101284	0.0100773	0.0675212	5.16676e+07	0	1.31125e+06	0	3.76339e+07	5.16676e+07
rna9572	784181	LDLRAD1	388633	LDLRAD1	157	0.999895	156	Q	Q	R,H	is_ccs1	ScimitarHornedOryx	ArabianCamel,Bactriancamel,WildBactrianCamel	fore	0.0386002	0.0378647	0.0999409	711995	inf	40763	0	736517	736517
rna63211	514682	PRIM2	5558	PRIM2	426	0.999997	425	L	L	P,Q,A	is_ccs1	ScimitarHornedOryx	ArabianCamel,Bactriancamel,WildBactrianCamel	fore	0.00792733	0.00789599	0.0674215	inf	inf	334946	0	inf	334946
rna15340	281487	PMEL	6490	PMEL	380	0.999936	379	D	R	G	is_ccs2	ScimitarHornedOryx	ArabianCamel,Bactriancamel,WildBactrianCamel	fore	0.0242097	0.023919	0.0841766	0	0	1.47661e+08	inf	0	1.47661e+08
rna27428	505300	SMPDL3A	10924	SMPDL3A	360	0.999952	359	V	T	A	is_ccs2	ScimitarHornedOryx	ArabianCamel,Bactriancamel,WildBactrianCamel	fore	0.00411345	0.004105	0.0626013	0	0	1492.95	inf	0	1492.95
rna33224	516921	EML6	400954	EML6	580	0.999877	579	T	T	P,A	is_ccs1	ScimitarHornedOryx	ArabianCamel,Bactriancamel,WildBactrianCamel	fore	0.00526972	0.00525586	0.0674215	29713.8	445036	281.09	0	6923.19	445036
rna46277	540692	RASAL2	9462	RASAL2	985	0.999929	984	I	V	M	is_ccs2	ScimitarHornedOryx	ArabianCamel,Bactriancamel,WildBactrianCamel	fore	0.0115461	0.0114797	0.0700263	0	0	8618.9	2.39201e+08	0	2.39201e+08
rna58857	529775	LYSMD4	145748	LYSMD4	217	0.999915	216	R	H	Q	is_ccs2	ScimitarHornedOryx	ArabianCamel,Bactriancamel,WildBactrianCamel	fore	0.0186283	0.0184559	0.0776309	1.1628	inf	5.81462e+07	inf	0	5.81462e+07
rna70894	101906614	TCERG1L	256536	TCERG1L	216	0.999822	215	Q	K	R	is_ccs2	ScimitarHornedOryx	ArabianCamel,Bactriancamel,WildBactrianCamel	fore	0.0118823	0.0118119	0.0710515	0	0	38204	21868.1	0	38204
rna11764	281450	RELN	5649	RELN	2858	0.999938	2857	T	T	A	is_ccs1	Gemsbok	ArabianCamel,Bactriancamel,WildBactrianCamel	fore	0.01829	0.0181237	0.0776309	367048	501.705	98022.3	0	405267	405267
rna17675	507901	GTSE1	51512	GTSE1	129	0.999962	128	R	R	W,G	is_ccs1	Gemsbok	ArabianCamel,Bactriancamel,WildBactrianCamel	fore	0.0186977	0.018524	0.0776309	298614	38.1895	173284	387.743	1.26936e+06	1.26936e+06
rna35256	523720	NTNG2	84628	NTNG2	208	0.999928	207	H	H	R	is_ccs1	Gemsbok	ArabianCamel,Bactriancamel,WildBactrianCamel	fore	0.00777739	0.00774722	0.0674215	4.41888e+06	3842.63	8131.22	0	2.12321e+07	2.12321e+07
rna35757	536255	PNPLA7	375775	PNPLA7	358	0.999898	357	S	S	G	is_ccs1	Gemsbok	ArabianCamel,Bactriancamel,WildBactrianCamel	fore	0.00411278	0.00410433	0.0626013	861.139	0.0612	3412.08	0	12297.1	12297.1
rna37472	533620	ANKRD26	22852	ANKRD26	255	0.999938	254	T	T	A	is_ccs1	Gemsbok	ArabianCamel,Bactriancamel,WildBactrianCamel	fore	0.0329502	0.0324133	0.0933917	2323.46	0.4644	730.274	5.1982	3871.94	3871.94
rna39063	507459	SLC52A3	113278	SLC52A3	202	0.999831	201	S	S	P,A	is_ccs1	Gemsbok	ArabianCamel,Bactriancamel,WildBactrianCamel	fore	0.00798061	0.00794885	0.0674215	48399.5	inf	12945.8	inf	41420.2	48399.5
rna42632	528261	PLEKHA7	144100	PLEKHA7	494	0.999933	493	M	M	V	is_ccs1	Gemsbok	ArabianCamel,Bactriancamel,WildBactrianCamel	fore	0.0193086	0.0191233	0.0786421	2.31223e+07	10869.5	1.84039e+07	0	6.93287e+07	6.93287e+07
rna45469	520588	SUCO	51430	SUCO	66	0.99999	65	V	V	A,G,T	is_ccs1	Gemsbok	ArabianCamel,Bactriancamel,WildBactrianCamel	fore	0.0142087	0.0141082	0.0741515	5.24001e+07	16865.1	2.36858e+07	0	8.16447e+07	8.16447e+07
rna59545	521892	ETFA	2108	ETFA	177	0.999938	176	T	T	A	is_ccs1	Gemsbok	ArabianCamel,Bactriancamel,WildBactrianCamel	fore	0.0254059	0.0250859	0.086465	3.39417e+08	inf	8.8592e+07	0	2.9622e+08	3.39417e+08
rna69418	517290	LIPM	340654	LIPM	75	0.999695	74	I	I	V,L	is_ccs1	Gemsbok	ArabianCamel,Bactriancamel,WildBactrianCamel	fore	0.0352872	0.0346719	0.0971534	1762.63	0	490.838	0	1987.63	1987.63
rna74578	783525	CARNS1	57571	CARNS1	763	0.99971	762	I	I	V	is_ccs1	Gemsbok	ArabianCamel,Bactriancamel,WildBactrianCamel	fore	0.00342743	0.00342156	0.0626013	4.2009e+08	15339.8	9.69885e+07	0	4.04901e+08	4.2009e+08
rna9895	515836	CCDC17	149483	CCDC17	453	0.999915	452	H	H	Q	is_ccs1	Gemsbok	ArabianCamel,Bactriancamel,WildBactrianCamel	fore	0.0120654	0.0119929	0.0715665	2.04373e+08	34699.3	1.22345e+08	0	3.47948e+08	3.47948e+08
rna29534	281944	NR2E3	10002	NR2E3	116	0.999972	115	R	R	Q,L,M	is_ccs1	Gemsbok	ArabianCamel,Bactriancamel,WildBactrianCamel	fore	0.021049	0.020829	0.0799659	3.23295e+07	4.8838e+08	0.0494	0	188429	4.8838e+08
rna151	100296254	KRTAP7-1	337878	KRTAP7-1	40	0.99989	39	S	D	G	is_ccs2	Gemsbok	ArabianCamel,Bactriancamel,WildBactrianCamel	fore	0.0293421	0.0289158	0.0883502	0	0	36.9351	inf	0	36.9351
rna37799	617347	OLAH	55301	OLAH	139	0.999922	138	Q	R	H	is_ccs2	Gemsbok	ArabianCamel,Bactriancamel,WildBactrianCamel	fore	0.0111952	0.0111328	0.0693712	5.0381	1.7761	170352	67732.2	inf	170352
rna43792	506302	RAG1	5896	RAG1	83	0.999824	82	E	G	D	is_ccs2	Gemsbok	ArabianCamel,Bactriancamel,WildBactrianCamel	fore	0.0133127	0.0132245	0.0731015	0	0	676.059	357.415	0	676.059
rna46894	107131237	PPP1R12B	4660	PPP1R12B	497	0.999918	496	C	C	S,H,Y	is_ccs1	Gemsbok	ArabianCamel,Bactriancamel,WildBactrianCamel	fore	0.00774217	0.00771228	0.0674215	734723	1.06076e+06	40010.3	174.068	147003	1.06076e+06
rna52471	101907648	LOC101907648	#N/A	#N/A	7	0.999928	6	S	Y	C	is_ccs2	Gemsbok	ArabianCamel,Bactriancamel,WildBactrianCamel	fore	0.0135519	0.0134605	0.0731015	0	0	4.66973e+06	inf	0	4.66973e+06
rna7389	507196	SHC1	6464	SHC1	321	0.999935	320	I	P	T	is_ccs2	Gemsbok	ArabianCamel,Bactriancamel,WildBactrianCamel	fore	0.00268789	0.00268428	0.0626013	0	0	104924	inf	0	104924
rna26366	617113	SLC35D2	11046	SLC35D2	265	0.999971	264	G	G	R	is_ccs1	addaxhosomaodatus	ArabianCamel,Bactriancamel,WildBactrianCamel	fore	0.0290739	0.0286553	0.0883502	51660.1	inf	14991.5	inf	57496.5	57496.5
rna26670	515561	ZNF462	58499	ZNF462	1445	0.999892	1444	T	T	A,S	is_ccs1	addaxhosomaodatus	ArabianCamel,Bactriancamel,WildBactrianCamel	fore	0.00279089	0.002787	0.0626013	35399	243.556	480.998	0.0005	29589.1	35399
rna28833	519461	SLC22A1	6580	SLC22A1	352	0.999922	351	M	M	V	is_ccs1	addaxhosomaodatus	ArabianCamel,Bactriancamel,WildBactrianCamel	fore	0.00835503	0.00832022	0.0674215	6.27286e+06	49896.8	53865.4	0	8.075e+06	8.075e+06
rna37174	618499	TMEM255B	348013	TMEM255B	115	0.999688	114	R	R	K	is_ccs1	addaxhosomaodatus	ArabianCamel,Bactriancamel,WildBactrianCamel	fore	0.0104468	0.0103924	0.0679217	1.5946e+06	49.9445	3243.26	0	2.55603e+06	2.55603e+06
rna47724	513072	MMP17	4326	MMP17	182	0.999928	181	T	T	A	is_ccs1	addaxhosomaodatus	ArabianCamel,Bactriancamel,WildBactrianCamel	fore	0.0082471	0.00821319	0.0674215	113493	473.064	24185.8	0	121732	121732
rna47835	100847550	DNAH10	196385	DNAH10	2501	0.999964	2500	S	S	N,H	is_ccs1	addaxhosomaodatus	ArabianCamel,Bactriancamel,WildBactrianCamel	fore	0.0132131	0.0131261	0.0731015	34.0254	3.8414	7.4723	0	32.346	34.0254
rna51119	107131422	LOC107131422	83889	WDR87	1267	0.999926	1266	S	S	N	is_ccs1	addaxhosomaodatus	ArabianCamel,Bactriancamel,WildBactrianCamel	fore	0.246832	0.0258851	0.0874519	1407.14	18.8621	915.746	345063	2671.13	345063
rna53129	523461	LOC523461	390980	ZNF805	451	0.999895	450	A	A	T,S	is_ccs1	addaxhosomaodatus	ArabianCamel,Bactriancamel,WildBactrianCamel	fore	0.028597	0.028192	0.0883502	2998.66	1.4152	976.881	3.7266	5624.86	5624.86
rna70118	518801	CFAP43	80217	CFAP43	478	0.999742	477	D	D	E,G	is_ccs1	addaxhosomaodatus	ArabianCamel,Bactriancamel,WildBactrianCamel	fore	0.00840886	0.0083736	0.0674215	121679	1146.64	34958.2	0.0299	132288	132288
rna75822	112445121	PNMA6E	105373377	LOC105373377	137	0.999999	136	V	V	A,E	is_ccs1	addaxhosomaodatus	ArabianCamel,Bactriancamel,WildBactrianCamel	fore	0.00937943	0.00933558	0.0675186	17.1296	0.0344	5.2296	0.0856	16.7465	17.1296
rna781	532832	CCDC191	57577	CCDC191	795	0.99991	794	L	L	V	is_ccs1	addaxhosomaodatus	ArabianCamel,Bactriancamel,WildBactrianCamel	fore	0.029478	0.0290477	0.0883502	2290.49	7.5146	659.386	0	2422.85	2422.85
rna8283	512078	AP4B1	10717	AP4B1	256	0.999923	255	A	A	T	is_ccs1	addaxhosomaodatus	ArabianCamel,Bactriancamel,WildBactrianCamel	fore	0.0114383	0.0113732	0.0700263	305665	27692.8	625.765	0	256410	305665
rna44476	616239	TCN1	6947	TCN1	282	0.99998	281	A	A	L,I,N,V,T	is_ccs1	addaxhosomaodatus	ArabianCamel,Bactriancamel,WildBactrianCamel	fore	0.0102356	0.0101834	0.0675212	737.668	262.307	7.827	0.0005	268.329	737.668
rna10495	618155	C3H1orf216	127703	C1orf216	116	0.999745	115	G	N	D	is_ccs2	addaxhosomaodatus	ArabianCamel,Bactriancamel,WildBactrianCamel	fore	0.00860118	0.0085643	0.0674215	0	0	9583.07	279307	0	279307
rna17199	617924	BAIAP2L2	80115	BAIAP2L2	285	0.999882	284	C	T	S	is_ccs2	addaxhosomaodatus	ArabianCamel,Bactriancamel,WildBactrianCamel	fore	0.0354842	0.034862	0.0971534	1.7365	135.935	1.417	310.559	1.6929	310.559
rna28146	112441525	LOC112441525	#N/A	#N/A	58	0.99999	57	M	M	T,K,R	is_ccs1	addaxhosomaodatus	ArabianCamel,Bactriancamel,WildBactrianCamel	fore	0	0	0	112162	4903.15	70023.3	0	341887	341887
rna28437	515729	FUCA2	2519	FUCA2	133	0.99996	132	A	G	D	is_ccs2	addaxhosomaodatus	ArabianCamel,Bactriancamel,WildBactrianCamel	fore	0.0111391	0.0110773	0.0693712	0	0	2.95497e+06	9.92209e+06	0	9.92209e+06
rna43365	539601	FCHSD2	9873	FCHSD2	724	0.999931	723	T	V	A	is_ccs2	addaxhosomaodatus	ArabianCamel,Bactriancamel,WildBactrianCamel	fore	0.00906736	0.00902638	0.0674215	0	0	1.32238e+07	8.6181e+06	0	1.32238e+07
rna61498	520497	OGG1	4968	OGG1	316	0.999878	315	R	H	Q	is_ccs2	addaxhosomaodatus	ArabianCamel,Bactriancamel,WildBactrianCamel	fore	0.0195152	0.019326	0.0787636	0	0	1.0394e+06	inf	0	1.0394e+06
rna63150	510120	MCM2	4171	MCM2	23	0.999925	22	M	A	T	is_ccs2	addaxhosomaodatus	ArabianCamel,Bactriancamel,WildBactrianCamel	fore	0.0189091	0.0187314	0.0781435	0	0	1873.5	5354.79	0	5354.79
rna6714	782871	FCRLA	84824	FCRLA	273	0.999957	272	L	C	P	is_ccs2	addaxhosomaodatus	ArabianCamel,Bactriancamel,WildBactrianCamel	fore	0.0377606	0.0370565	0.0997256	0	0	2.32214e+06	2.41306e+08	0	2.41306e+08
rna6956	524565	FCRL6	343413	FCRL6	156	0.999957	155	M	M	T,V,S	is_ccs1	addaxhosomaodatus	ArabianCamel,Bactriancamel,WildBactrianCamel	fore	0.0385601	0.0378261	0.0999409	565.817	194.134	19.3053	743.708	90.9639	743.708
rna70515	767880	ENO4	387712	ENO4	14	0.999831	13	K	M	R	is_ccs2	addaxhosomaodatus	ArabianCamel,Bactriancamel,WildBactrianCamel	fore	0.0157997	0.0156755	0.0757153	0	0	284015	1.61565e+07	0	1.61565e+07
rna73701	506260	ARHGAP32	9743	ARHGAP32	1114	0.999979	1113	Y	C	S	is_ccs2	addaxhosomaodatus	ArabianCamel,Bactriancamel,WildBactrianCamel	fore	0.0160595	0.0159312	0.0757153	0.0001	0.121	800.277	992.181	0	992.181
rna16592	100295672	KLRG1	10219	KLRG1	98	0.999799	97	N	N	D	is_ccs1	Gemsbok,ScimitarHornedOryx,addaxhosomaodatus	Bactriancamel,WildBactrianCamel	fore	0.0291517	0.0287309	0.0883502	113537	inf	29525.9	0	143246	143246
rna27569	529670	LAMA4	3910	LAMA4	1637	0.99995	1636	T	T	N	is_ccs1	Gemsbok,ScimitarHornedOryx,addaxhosomaodatus	Bactriancamel,WildBactrianCamel	fore	0.0230853	0.0228209	0.0833388	221046	inf	42069.3	0	210163	221046
rna42221	515758	TTC12	54970	TTC12	296	0.999935	295	H	H	R	is_ccs1	Gemsbok,ScimitarHornedOryx,addaxhosomaodatus	Bactriancamel,WildBactrianCamel	fore	0.00475425	0.00474297	0.0674215	111561	0	33278.5	0	113322	113322
rna46763	520406	CRB1	23418	CRB1	254	0.999908	253	S	S	G	is_ccs1	Gemsbok,ScimitarHornedOryx,addaxhosomaodatus	Bactriancamel,WildBactrianCamel	fore	0.00771999	0.00769027	0.0674215	2504.55	0	641.078	3.2494	3253.31	3253.31
rna50068	534394	FAM192A	80011	FAM192A	132	0.999931	131	L	L	V	is_ccs1	Gemsbok,ScimitarHornedOryx,addaxhosomaodatus	Bactriancamel,WildBactrianCamel	fore	0.0180735	0.0179111	0.0776309	55736.7	0	9149.54	0	38230.8	55736.7
rna51681	514023	ZNF180	7733	ZNF180	278	0.999959	277	G	G	E	is_ccs1	Gemsbok,ScimitarHornedOryx,addaxhosomaodatus	Bactriancamel,WildBactrianCamel	fore	0.0302799	0.0298261	0.0897138	171868	inf	35908.4	0	211792	211792
rna52313	100848343	ASPDH	554235	ASPDH	260	0.999979	259	R	R	T,S	is_ccs1	Gemsbok,ScimitarHornedOryx,addaxhosomaodatus	Bactriancamel,WildBactrianCamel	fore	0.0256377	0.0253119	0.0868513	23744.7	13300.4	6891.87	0	25214.5	25214.5
rna8881	784894	TGFBR3	7049	TGFBR3	5	0.999939	4	K	K	E	is_ccs1	Gemsbok,ScimitarHornedOryx,addaxhosomaodatus	Bactriancamel,WildBactrianCamel	fore	0.0130771	0.012992	0.0731015	1.6297e+07	0	0.677	0	1.42611e+07	1.6297e+07
rna26658	524755	TAL2	6887	TAL2	32	0.999795	31	Y	R	H	is_ccs2	Gemsbok,ScimitarHornedOryx,addaxhosomaodatus	Bactriancamel,WildBactrianCamel	fore	0.0258065	0.0254764	0.0871435	0	0	2.09203e+08	inf	0	2.09203e+08
rna38831	504784	GATA5	140628	GATA5	169	0.999872	168	S	A	G	is_ccs2	Gemsbok,ScimitarHornedOryx,addaxhosomaodatus	Bactriancamel,WildBactrianCamel	fore	0.0242058	0.0239151	0.0841766	0	0	97559.8	50725.7	0	97559.8
rna45914	508711	GABRD	2563	GABRD	346	0.999963	345	R	R	P,C	is_ccs1	Gemsbok,ScimitarHornedOryx,addaxhosomaodatus	Bactriancamel,WildBactrianCamel	fore	0	0	0	6766.12	inf	220.696	inf	1041.72	6766.12
rna73169	523885	TMEM135	65084	TMEM135	209	0.99995	208	A	I	T	is_ccs2	Gemsbok,ScimitarHornedOryx,addaxhosomaodatus	Bactriancamel,WildBactrianCamel	fore	0.00562186	0.00560609	0.0674215	0	0	2055.07	inf	0	2055.07
rna76706	513680	NHSL2	340527	NHSL2	244	0.999927	243	S	Q	P	is_ccs2	Gemsbok,ScimitarHornedOryx,addaxhosomaodatus	Bactriancamel,WildBactrianCamel	fore	0.029774	0.0293351	0.0889777	0	0	72036.6	inf	0	72036.6
rna10493	508363	CLSPN	63967	CLSPN	345	0.999888	344	R	R	K,E	is_ccs1	Gemsbok,ScimitarHornedOryx,addaxhosomaodatus	Bactriancamel	fore	0.00998449	0.00993481	0.0675212	1.31025e+08	inf	2.84058e+07	0	1.4832e+08	1.4832e+08
rna16485	101904903	LOC101904903	51266	CLEC1B	43	0.999963	42	V	V	I,K	is_ccs1	Gemsbok,ScimitarHornedOryx,addaxhosomaodatus	Bactriancamel	fore	0.0293869	0.0289593	0.0883502	3.64464e+07	inf	9.69893e+06	0	3.78353e+07	3.78353e+07
rna46121	512520	FHAD1	114827	FHAD1	660	0.999985	659	C	C	R	is_ccs1	Gemsbok,ScimitarHornedOryx,addaxhosomaodatus	Bactriancamel	fore	0.0306136	0.0301497	0.0897138	2.26504e+08	0	5.82897e+07	0	2.37734e+08	2.37734e+08
rna16377	537804	GRIN2B	2904	GRIN2B	1169	0.999926	1168	E	A	D	is_ccs2	Gemsbok,ScimitarHornedOryx,addaxhosomaodatus	Bactriancamel	fore	0.0012312	0.00123044	0.0536884	0	0	169875	84057.4	0	169875
rna66857	615982	PHLPP1	23239	PHLPP1	171	0.999971	170	N	I	S	is_ccs2	Gemsbok,ScimitarHornedOryx,addaxhosomaodatus	Bactriancamel	fore	0.0372557	0.0365702	0.0993263	0.2342	13493.5	503.039	8.71642e+07	0.0211	8.71642e+07
rna35761	101907584	DPH7	92715	DPH7	34	0.999972	33	M	M	L,A,T	is_ccs1	Gemsbok,ScimitarHornedOryx,addaxhosomaodatus	WildBactrianCamel	fore	0.00621428	0.00619501	0.0674215	5.31306e+07	4237.17	4.49898e+06	66.9663	6.59664e+07	6.59664e+07
rna35824	515082	OLFM4	10562	OLFM4	53	0.999871	52	S	S	P,A,T	is_ccs1	Gemsbok,ScimitarHornedOryx,addaxhosomaodatus	WildBactrianCamel	fore	0.0190979	0.0189167	0.0783794	2.52347e+07	0	7.18058e+06	1.3326	3.2472e+07	3.2472e+07
rna15568	529659	SLC17A8	246213	SLC17A8	122	0.999763	121	D	D	N	is_ccs1	Gemsbok,ScimitarHornedOryx,addaxhosomaodatus	ArabianCamel	fore	0.0382314	0.0375098	0.0997367	438816	0	91267.2	0	397613	438816
rna16258	537451	GYS2	2998	GYS2	221	0.999867	220	R	R	Q,H	is_ccs1	Gemsbok,ScimitarHornedOryx,addaxhosomaodatus	ArabianCamel	fore	0.0139657	0.0138686	0.073921	74239.2	0	13418.3	0	68072.3	74239.2
rna16532	616060	CLEC9A	283420	CLEC9A	148	0.999999	147	L	L	S,P,C	is_ccs1	Gemsbok,ScimitarHornedOryx,addaxhosomaodatus	ArabianCamel	fore	0.00567263	0.00565657	0.0674215	6.32412e+06	0	2.16281e+06	0	7.89776e+06	7.89776e+06
rna30606	521854	NID2	22795	NID2	341	0.999982	340	H	H	P,L	is_ccs1	Gemsbok,ScimitarHornedOryx,addaxhosomaodatus	ArabianCamel	fore	0.0278137	0.0274305	0.0883502	11.1859	0	2.4007	0	10.7471	11.1859
rna33420	512311	SLC5A7	60482	SLC5A7	548	0.999902	547	V	V	I,L	is_ccs1	Gemsbok,ScimitarHornedOryx,addaxhosomaodatus	ArabianCamel	fore	0.00201266	0.00201064	0.0595674	7.24795e+07	15659.9	6.21132e+07	0	1.63781e+08	1.63781e+08
rna36122	513955	SERPINE3	647174	SERPINE3	18	0.999937	17	E	E	G	is_ccs1	Gemsbok,ScimitarHornedOryx,addaxhosomaodatus	ArabianCamel	fore	0.0186592	0.0184862	0.0776309	729690	0	614.895	0	1.51705e+07	1.51705e+07
rna42288	510313	BUD13	84811	BUD13	27	0.999798	26	A	A	G	is_ccs1	Gemsbok,ScimitarHornedOryx,addaxhosomaodatus	ArabianCamel	fore	0.00839205	0.00835694	0.0674215	22.8471	0.0099	6.4239	4.4441	22.7299	22.8471
rna48487	505792	MVK	4598	MVK	155	0.999952	154	V	V	A,T,M	is_ccs1	Gemsbok,ScimitarHornedOryx,addaxhosomaodatus	ArabianCamel	fore	0.0289742	0.0285585	0.0883502	2.67546e+08	inf	6.11591e+07	0	2.36344e+08	2.67546e+08
rna50160	528348	CCDC113	29070	CCDC113	189	0.99994	188	P	P	Q	is_ccs1	Gemsbok,ScimitarHornedOryx,addaxhosomaodatus	ArabianCamel	fore	0.00995127	0.00990192	0.0675212	3449.65	0.1381	5592.94	0	19924.7	19924.7
rna65394	509176	SYCP2L	221711	SYCP2L	774	0.999946	773	F	F	L	is_ccs1	Gemsbok,ScimitarHornedOryx,addaxhosomaodatus	ArabianCamel	fore	0.0108688	0.0108099	0.0690077	114257	0	1.02758e+06	915.447	4.23752e+06	4.23752e+06
rna11575	100336913	ABCB4	5244	ABCB4	244	0.999478	243	F	C	Y	is_ccs2	Gemsbok,ScimitarHornedOryx,addaxhosomaodatus	ArabianCamel	fore	0.00100377	0.00100327	0.047895	0	0	2.98427e+07	inf	0	2.98427e+07
rna12457	508728	DDX56	54606	DDX56	312	0.999866	311	A	T	P	is_ccs2	Gemsbok,ScimitarHornedOryx,addaxhosomaodatus	ArabianCamel	fore	0.00262694	0.00262349	0.0626013	0	0	1690.41	inf	0	1690.41
rna26094	782674	NOL6	65083	NOL6	748	0.999895	747	C	Q	R	is_ccs2	Gemsbok,ScimitarHornedOryx,addaxhosomaodatus	ArabianCamel	fore	0.0292176	0.0287949	0.0883502	0	0	9.57741e+07	inf	0	9.57741e+07
rna29534	281944	NR2E3	10002	NR2E3	27	0.999851	26	A	S	P	is_ccs2	Gemsbok,ScimitarHornedOryx,addaxhosomaodatus	ArabianCamel	fore	0.021049	0.020829	0.0799659	0	0	64794.4	1.57004e+08	0	1.57004e+08
rna30889	618035	RAB27A	5873	RAB27A	1	0.999916	0	L	S	P	is_ccs2	Gemsbok,ScimitarHornedOryx,addaxhosomaodatus	ArabianCamel	fore	0.0319067	0.031403	0.092194	0.0432	0.0369	7.31881e+06	1.11211e+08	0	1.11211e+08
rna46659	511599	C16H1orf74	148304	C1orf74	131	0.999866	130	V	S	A	is_ccs2	Gemsbok,ScimitarHornedOryx,addaxhosomaodatus	ArabianCamel	fore	0.0149687	0.0148572	0.0757153	0	0	699370	inf	0	699370
rna60170	100300409	BTBD7	55727	BTBD7	1027	0.999866	1026	V	S	A	is_ccs2	Gemsbok,ScimitarHornedOryx,addaxhosomaodatus	ArabianCamel	fore	0.0198508	0.019655	0.0787636	0	0	1656.25	1013.78	0	1656.25
rna6924	537960	ATP1A4	480	ATP1A4	837	0.999948	836	P	D	A	is_ccs2	Gemsbok,ScimitarHornedOryx,addaxhosomaodatus	ArabianCamel	fore	0.0279284	0.027542	0.0883502	0	0	16134.4	7384.35	0	16134.4
rna70592	525169	WDR11	55717	WDR11	982	0.999908	981	T	S	A	is_ccs2	Gemsbok,ScimitarHornedOryx,addaxhosomaodatus	ArabianCamel	fore	0.0136073	0.0135151	0.0731015	358.971	inf	923.365	389582	326.361	389582
rna11830	786198	CDHR3	222256	CDHR3	292	0.999999	291	M	M	A,T	is_ccs1	Gemsbok,ScimitarHornedOryx	Bactriancamel,WildBactrianCamel	fore	0.00377033	0.00376323	0.0626013	2.37303e+06	0	1.05398e+06	0	3.64704e+06	3.64704e+06
rna72338	613849	COL13A1	1305	COL13A1	20	0.999993	19	G	E	D	is_ccs2	Gemsbok,ScimitarHornedOryx	WildBactrianCamel	fore	0.00563164	0.00561581	0.0674215	0	1322.54	645.41	0	1.2012	1322.54
rna36591	508454	GJB6	10804	GJB6	252	0.999991	251	T	T	A,S	is_ccs1	Gemsbok,ScimitarHornedOryx	ArabianCamel	fore	0.00331921	0.00331371	0.0626013	2.43007e+06	2593.69	376078	0	2.62698e+06	2.62698e+06
rna45861	616459	MEGF6	1953	MEGF6	657	0.999996	656	L	L	P	is_ccs1	Gemsbok	ArabianCamel	fore	0.0373903	0.0366999	0.0993263	296269	0	41524.6	0	300096	300096
rna45871	100137803	PRDM16	63976	PRDM16	115	0.999981	114	S	V	G	is_ccs2	Gemsbok	ArabianCamel	fore	0.00626906	0.00624945	0.0674215	0	0	60997.9	inf	0	60997.9
rna62829	540622	CDCP1	64866	CDCP1	606	0.999986	605	S	H	P	is_ccs2	Gemsbok	ArabianCamel	fore	0.00422808	0.00421915	0.0630823	0	0	6650.27	inf	0	6650.27
rna50372	100336872	RIPOR1	79567	FAM65A	713	0.999999	712	K	K	T,I,V	is_ccs1	ScimitarHornedOryx	ArabianCamel	fore	0.00649307	0.00647204	0.0674215	2354.91	inf	620.935	0	2926.3	2926.3
rna62735	506969	ALS2CL	259173	ALS2CL	498	0.999983	497	S	N	T	is_ccs2	ScimitarHornedOryx	ArabianCamel	fore	0.00300508	0.00300057	0.0626013	0	0	591802	inf	0	591802
rna10452	512106	MAP7D1	55700	MAP7D1	131	0.999989	130	G	Q	E	is_ccs2	Gemsbok	Bactriancamel	fore	0.01833	0.0181631	0.0776309	0	0	8.48115e+06	inf	0	8.48115e+06
rna60585	537748	DYNC1H1	1778	DYNC1H1	2046	0.999996	2045	L	N	I	is_ccs2	Gemsbok	Bactriancamel	fore	0.00251123	0.00250808	0.062588	0	0	708177	inf	0	708177
rna30938	523056	BCL2L10	10017	BCL2L10	33	0.999977	32	I	I	M,V,L	is_ccs1	addaxhosomaodatus	Bactriancamel	fore	0	0	0	1.01652e+08	inf	5336.96	0	18685.7	1.01652e+08
rna37936	281509	SVIL	6840	SVIL	1024	0.999982	1023	M	M	T,V,L	is_ccs1	addaxhosomaodatus	Bactriancamel,WildBactrianCamel	fore	0.00212097	0.00211872	0.0596502	1.31635e+08	889012	2.87077e+07	0	1.18935e+08	1.31635e+08
rna59102	533090	POLG	5428	POLG	214	0.999989	213	T	V	A	is_ccs2	addaxhosomaodatus	Bactriancamel,WildBactrianCamel	fore	0.00206366	0.00206153	0.0595674	0	0	4.18717e+07	inf	0	4.18717e+07
rna31821	529720	PROX2	283571	PROX2	430	0.999985	429	T	V	A	is_ccs2	addaxhosomaodatus	ArabianCamel	fore	0.00875535	0.00871713	0.0674215	0	0	19469.7	inf	0	19469.7
rna47326	513234	MGARP	84709	MGARP	164	0.999979	163	K	Q	E	is_ccs2	addaxhosomaodatus	ArabianCamel	fore	0.032917	0.0323811	0.0933917	0	0	2.42914e+07	inf	0	2.42914e+07
rna48336	534434	HECTD4	283450	HECTD4	2716	0.999986	2715	L	T	P	is_ccs2	addaxhosomaodatus	ArabianCamel	fore	0.0155663	0.0154458	0.0757153	0	0	5494.7	1.04414e+08	0	1.04414e+08
rna11900	534500	NRCAM	4897	NRCAM	903	0.998618	902	A	A	P,S	is_ccs1	ArabianCamel,Bactriancamel,WildBactrianCamel	PereDavidsDeer,Reindeer	back	0.0278181	0.0274348	0.0883502	73.4701	149.634	13.2701	4.1626	61.924	149.634
rna12935	520924	NUP205	23165	NUP205	984	0.9993	983	A	S	T	is_ccs2	ArabianCamel,Bactriancamel,WildBactrianCamel	PereDavidsDeer,Reindeer	back	0.00817913	0.00814577	0.0674215	0	0	603.735	487.728	0	603.735
rna1327	524132	LPP	4026	LPP	80	0.996545	79	I	I	V,L,S	is_ccs1	ArabianCamel,Bactriancamel,WildBactrianCamel	PereDavidsDeer,Reindeer	back	0.0156587	0.0155368	0.0757153	11556	138150	177.806	0.0929	829	138150
rna14429	782368	AQP5	362	AQP5	46	0.99995	45	S	S	F,H,R,G,Y	is_ccs1	ArabianCamel,Bactriancamel,WildBactrianCamel	PereDavidsDeer,Reindeer	back	0.00350221	0.00349608	0.0626013	3899.36	11325.1	0.081	0.0003	0.2906	11325.1
rna14440	504364	NCKAP5L	57701	NCKAP5L	1184	0.998448	1183	M	M	V,L	is_ccs1	ArabianCamel,Bactriancamel,WildBactrianCamel	PereDavidsDeer,Reindeer	back	0.0246306	0.0243298	0.0845382	1217.41	4.7682	207.909	0.0156	969.761	1217.41
rna14484	617860	SPATS2	65244	SPATS2	103	0.999273	102	V	V	T,I	is_ccs1	ArabianCamel,Bactriancamel,WildBactrianCamel	PereDavidsDeer,Reindeer	back	0.0198091	0.0196142	0.0787636	21961.7	0.8339	5406.25	0.0097	21306.2	21961.7
rna15017	506574	LRIG3	121227	LRIG3	184	0.999507	183	S	S	N	is_ccs1	ArabianCamel,Bactriancamel,WildBactrianCamel	PereDavidsDeer,Reindeer	back	0.0245954	0.0242954	0.0845382	7.666	1.6229	1.9367	0.2385	7.1212	7.666
rna15605	615734	SLC5A8	160728	SLC5A8	500	0.999232	499	T	L	I	is_ccs2	ArabianCamel,Bactriancamel,WildBactrianCamel	PereDavidsDeer,Reindeer	back	0.0234337	0.0231613	0.0836549	0.0308	0.0088	1765.07	1.01755e+06	0.0415	1.01755e+06
rna1919	513309	GFM1	85476	GFM1	322	0.999245	321	E	Q	K	is_ccs2	ArabianCamel,Bactriancamel,WildBactrianCamel	PereDavidsDeer,Reindeer	back	0.0285555	0.0281516	0.0883502	0	0	749.504	693.198	0	749.504
rna1971	513565	PLCH1	23007	PLCH1	1156	0.999991	1155	L	L	A,P,S	is_ccs1	ArabianCamel,Bactriancamel,WildBactrianCamel	PereDavidsDeer,Reindeer	back	0	0	0	285.394	0.0285	131.978	116.434	454.208	454.208
rna237	280722	APP	351	APP	44	0.999828	43	A	T	I	is_ccs2	ArabianCamel,Bactriancamel,WildBactrianCamel	PereDavidsDeer,Reindeer	back	0.0100737	0.0100232	0.0675212	0	0	453.854	65406.4	0	65406.4
rna2607	508668	RIPK4	54101	RIPK4	341	0.998442	340	M	M	V,L	is_ccs1	ArabianCamel,Bactriancamel,WildBactrianCamel	PereDavidsDeer,Reindeer	back	0.0197917	0.0195971	0.0787636	39.7416	21.1518	6.661	0.0324	37.8922	39.7416
rna29324	783141	UBAP1L	390595	UBAP1L	211	0.999214	210	H	H	Y	is_ccs1	ArabianCamel,Bactriancamel,WildBactrianCamel	PereDavidsDeer,Reindeer	back	0.138648	0.00876774	0.0674215	2375.18	19.6267	569.135	0.0629	2430.33	2430.33
rna29608	508656	CD276	80381	CD276	47	0.999805	46	V	V	A	is_ccs1	ArabianCamel,Bactriancamel,WildBactrianCamel	PereDavidsDeer,Reindeer	back	0.00746446	0.00743667	0.0674215	4711.01	3.7094	713.302	0	3422.68	4711.01
rna30938	523056	BCL2L10	10017	BCL2L10	85	0.999465	84	S	L	P	is_ccs2	ArabianCamel,Bactriancamel,WildBactrianCamel	PereDavidsDeer,Reindeer	back	0.0162828	0.0161509	0.0757153	0.0013	0.001	3388.59	14756.5	0.0011	14756.5
rna31924	537054	POMT2	29954	POMT2	641	0.99965	640	R	E	G	is_ccs2	ArabianCamel,Bactriancamel,WildBactrianCamel	PereDavidsDeer,Reindeer	back	0.035586	0.0349603	0.0971807	0.0133	0.0202	72.5729	389.837	0.0135	389.837
rna36468	540674	WASF3	10810	WASF3	224	0.999766	223	T	T	A,V	is_ccs1	ArabianCamel,Bactriancamel,WildBactrianCamel	PereDavidsDeer,Reindeer	back	0.00939079	0.00934683	0.0675186	131.081	58.3966	22.2618	0.8781	85.1169	131.081
rna36901	506546	DZIP1	22873	DZIP1	580	0.999594	579	E	E	G	is_ccs1	ArabianCamel,Bactriancamel,WildBactrianCamel	PereDavidsDeer,Reindeer	back	0.024207	0.0239164	0.0841766	330.318	0	45.1331	0.005	330.437	330.437
rna38250	508097	ENTPD6	955	ENTPD6	260	0.997858	259	K	K	R	is_ccs1	ArabianCamel,Bactriancamel,WildBactrianCamel	PereDavidsDeer,Reindeer	back	0.0133129	0.0132246	0.0731015	291.74	0.0001	60.4927	0	294.954	294.954
rna39001	524105	SPO11	23626	SPO11	37	0.999435	36	E	S	G	is_ccs2	ArabianCamel,Bactriancamel,WildBactrianCamel	PereDavidsDeer,Reindeer	back	0.0248695	0.0245628	0.0850789	0.0003	0	20912	47587.3	0.0003	47587.3
rna40091	540080	CYP24A1	1591	CYP24A1	118	0.9993	117	A	S	T	is_ccs2	ArabianCamel,Bactriancamel,WildBactrianCamel	PereDavidsDeer,Reindeer	back	0.0225788	0.0223258	0.0823263	0.0348	0.3421	466.724	5741.22	0.025	5741.22
rna40368	540256	ZNF623	9831	ZNF623	348	0.998912	347	K	D	E	is_ccs2	ArabianCamel,Bactriancamel,WildBactrianCamel	PereDavidsDeer,Reindeer	back	0.0217952	0.0215594	0.0810692	0.0063	0.1389	6.3827	143.815	0.0066	143.815
rna42152	538766	C15H11orf1	64776	C11orf1	154	0.999575	153	A	I	T	is_ccs2	ArabianCamel,Bactriancamel,WildBactrianCamel	PereDavidsDeer,Reindeer	back	0.0323645	0.0318464	0.0927515	0	0	33098.3	1.65375e+06	0	1.65375e+06
rna46571	539953	DTL	51514	DTL	409	0.999851	408	M	M	V,G	is_ccs1	ArabianCamel,Bactriancamel,WildBactrianCamel	PereDavidsDeer,Reindeer	back	0.0332747	0.0327272	0.0937844	3683.58	4.5645	2931.2	1.0225	9891.09	9891.09
rna47255	540085	GAB1	2549	GAB1	293	0.999123	292	N	T	S	is_ccs2	ArabianCamel,Bactriancamel,WildBactrianCamel	PereDavidsDeer,Reindeer	back	0.0321783	0.0316661	0.0927184	0.0005	0	5303.72	16618.7	0.0011	16618.7
rna48145	786852	CIT	11113	CIT	1579	0.999464	1578	L	S	P	is_ccs2	ArabianCamel,Bactriancamel,WildBactrianCamel	PereDavidsDeer,Reindeer	back	0.0102606	0.0102081	0.0675212	0	0	7.279	5.0622	0	7.279
rna48527	538233	SSH1	54434	SSH1	446	0.999928	445	N	N	A,P,T,I	is_ccs1	ArabianCamel,Bactriancamel,WildBactrianCamel	PereDavidsDeer,Reindeer	back	0.00192496	0.00192311	0.0595674	28.1799	0.5435	6.1589	0.1433	26.9246	28.1799
rna49211	101906870	LOC101906870	7290	HIRA	294	0.999729	293	A	A	V	is_ccs1	ArabianCamel,Bactriancamel,WildBactrianCamel	PereDavidsDeer,Reindeer	back	0.00165878	0.0016574	0.0595674	396.661	7.0496	86.254	0.3134	329.641	396.661
rna51750	539328	EXOC3L2	90332	EXOC3L2	435	0.999626	434	W	P	R	is_ccs2	ArabianCamel,Bactriancamel,WildBactrianCamel	PereDavidsDeer,Reindeer	back	0.0254414	0.0251205	0.086465	0.0018	0.0141	328.71	998.438	0.0013	998.438
rna51848	100337373	SYMPK	8189	SYMPK	471	0.999455	470	Y	S	C	is_ccs2	ArabianCamel,Bactriancamel,WildBactrianCamel	PereDavidsDeer,Reindeer	back	0.00282907	0.00282507	0.0626013	0	0.009	101.542	174.467	0	174.467
rna51965	282715	CABP5	56344	CABP5	124	0.999849	123	A	A	K,E	is_ccs1	ArabianCamel,Bactriancamel,WildBactrianCamel	PereDavidsDeer,Reindeer	back	0.0110542	0.0109934	0.0693712	5249.31	138.506	301.252	0	5337.62	5337.62
rna52206	529621	PRR12	57479	PRR12	286	0.998943	285	I	M	V	is_ccs2	ArabianCamel,Bactriancamel,WildBactrianCamel	PereDavidsDeer,Reindeer	back	0.0270057	0.0266443	0.0881189	0.0355	0.3396	28.0485	24.1358	0.0026	28.0485
rna62414	525741	CAMKV	79012	CAMKV	509	0.9993	508	A	S	T	is_ccs2	ArabianCamel,Bactriancamel,WildBactrianCamel	PereDavidsDeer,Reindeer	back	0.0136876	0.0135943	0.0731694	0	0	382.001	3381.49	0	3381.49
rna63210	789972	KHDRBS2	202559	KHDRBS2	241	0.998993	240	A	A	V,T	is_ccs1	ArabianCamel,Bactriancamel,WildBactrianCamel	PereDavidsDeer,Reindeer	back	0.00713119	0.00710582	0.0674215	3175.2	14681.9	115.196	2.9506	486.841	14681.9
rna63984	516337	POLR1C	9533	POLR1C	245	0.999116	244	D	V	E	is_ccs2	ArabianCamel,Bactriancamel,WildBactrianCamel	PereDavidsDeer,Reindeer	back	0.00182483	0.00182317	0.0595674	0	0	138.25	96973	0	96973
rna65080	497622	HFE	3077	HFE	61	0.999547	60	T	V	A	is_ccs2	ArabianCamel,Bactriancamel,WildBactrianCamel	PereDavidsDeer,Reindeer	back	0.0373339	0.0366456	0.0993263	0	0	96.1003	6829.66	0	6829.66
rna69523	507518	EXOC6	54536	EXOC6	200	0.99893	199	R	R	Q	is_ccs1	ArabianCamel,Bactriancamel,WildBactrianCamel	PereDavidsDeer,Reindeer	back	0.00426261	0.00425354	0.0630823	49767.7	63310	9632.25	0.0962	48947.8	63310
rna69788	100139581	CRTAC1	55118	CRTAC1	389	0.999209	388	A	N	D	is_ccs2	ArabianCamel,Bactriancamel,WildBactrianCamel	PereDavidsDeer,Reindeer	back	0.0197544	0.0195606	0.0787636	42.1376	0	1904.19	300791	35.7893	300791
rna72316	614824	HKDC1	80201	HKDC1	186	0.999752	185	R	R	S	is_ccs1	ArabianCamel,Bactriancamel,WildBactrianCamel	PereDavidsDeer,Reindeer	back	0.00756648	0.00753793	0.0674215	115421	51.5452	4824.82	0.0001	118448	118448
rna7286	540563	ASH1L	55870	ASH1L	351	0.999758	350	S	S	N,H	is_ccs1	ArabianCamel,Bactriancamel,WildBactrianCamel	PereDavidsDeer,Reindeer	back	0.00391931	0.00391164	0.0626013	932.578	4.3615	222.834	0.0201	919.657	932.578
rna74591	533859	PITPNM1	9600	PITPNM1	479	0.999389	478	T	S	A	is_ccs2	ArabianCamel,Bactriancamel,WildBactrianCamel	PereDavidsDeer,Reindeer	back	0.00953895	0.0094936	0.0675212	0.0001	0	397.472	1592.64	0.0001	1592.64
rna76842	525644	OPHN1	4983	OPHN1	419	0.999544	418	N	N	S	is_ccs1	ArabianCamel,Bactriancamel,WildBactrianCamel	PereDavidsDeer,Reindeer	back	0.0173016	0.0171528	0.0771704	2.81371e+06	0	28651.3	2.3723	5.27457e+06	5.27457e+06
rna7688	531865	OAZ3	51686	OAZ3	84	0.99935	83	K	Q	E	is_ccs2	ArabianCamel,Bactriancamel,WildBactrianCamel	PereDavidsDeer,Reindeer	back	0.010397	0.0103432	0.0679217	0	0	7128.56	13860.2	0	13860.2
rna1327	524132	LPP	4026	LPP	80	0.997215	79	I	I	S,L,V	is_ccs1	ArabianCamel,Bactriancamel,WildBactrianCamel	Hippopotamus,bluewhale	back	0.0156587	0.0155368	0.0757153	0.8944	6.3357	5.5559	63.5649	0.2341	63.5649
rna1971	513565	PLCH1	23007	PLCH1	1156	0.938445	1155	L	L	S,A,P	is_ccs1	ArabianCamel,Bactriancamel,WildBactrianCamel	Hippopotamus,bluewhale	back	0	0	0	0.5513	13.1294	0.1591	1.0936	0.3277	13.1294
rna36468	540674	WASF3	10810	WASF3	224	0.930106	223	T	T	A,V	is_ccs1	ArabianCamel,Bactriancamel,WildBactrianCamel	Hippopotamus,bluewhale	back	0.00939079	0.00934683	0.0675186	0.1228	1.0485	0.3242	0.6323	0.0929	1.0485
rna48527	538233	SSH1	54434	SSH1	446	0.947377	445	N	N	T,A,I,P	is_ccs1	ArabianCamel,Bactriancamel,WildBactrianCamel	Hippopotamus,bluewhale	back	0.00192496	0.00192311	0.0595674	0.3028	1.6296	5.1397	14.6419	0.2547	14.6419
rna12071	511767	EEPD1	80820	EEPD1	462	0.999734	461	Y	Y	H,C	is_ccs1	ArabianCamel,Bactriancamel,WildBactrianCamel	Giraffe,Pronghorn	back	0.0309432	0.0304694	0.0901762	400.942	2670.2	54.5437	0.4278	179.074	2670.2
rna13083	514693	AGK	55750	AGK	250	0.999776	249	V	V	I,T,L	is_ccs1	ArabianCamel,Bactriancamel,WildBactrianCamel	Giraffe,Pronghorn	back	0.0168402	0.0166992	0.0770303	1891.39	38.3466	990.756	0	1830.76	1891.39
rna1389	504615	FETUB	26998	FETUB	17	0.99996	16	R	R	G	is_ccs1	ArabianCamel,Bactriancamel,WildBactrianCamel	Giraffe,Pronghorn	back	0.021247	0.0210229	0.0804289	365.808	1.717	224.348	50.1519	405.735	405.735
rna14244	507184	LOC507184	3887	KRT81	32	0.999204	31	R	R	H,S,G,C,K	is_ccs1	ArabianCamel,Bactriancamel,WildBactrianCamel	Giraffe,Pronghorn	back	0	0	0	1.0061	26.3752	0.0101	0.0004	0.2146	26.3752
rna14764	100140959	MUC19	283463	MUC19	116	0.999922	115	S	S	N	is_ccs1	ArabianCamel,Bactriancamel,WildBactrianCamel	Giraffe,Pronghorn	back	0.021332	0.0211061	0.0804669	46.9873	0.3547	18.6452	4.9986	66.9676	66.9676
rna14874	513281	CPM	1368	CPM	162	0.999655	161	D	D	N,E	is_ccs1	ArabianCamel,Bactriancamel,WildBactrianCamel	Giraffe,Pronghorn	back	0.0366093	0.0359472	0.099171	372.846	4.7671	716.575	4.0677	763.194	763.194
rna15350	787259	PYM1	84305	PYM1	156	0.999994	155	L	L	P,S	is_ccs1	ArabianCamel,Bactriancamel,WildBactrianCamel	Giraffe,Pronghorn	back	0.00660417	0.00658241	0.0674215	9920.06	89103.5	2.2593	0.0001	15.1537	89103.5
rna15722	515605	APPL2	55198	APPL2	407	0.999984	406	V	V	A,P	is_ccs1	ArabianCamel,Bactriancamel,WildBactrianCamel	Giraffe,Pronghorn	back	0.00836398	0.0083291	0.0674215	41409.9	831.78	6625.9	0.7843	25586.6	41409.9
rna16842	282348	SCNN1A	6337	SCNN1A	10	0.999827	9	S	S	T	is_ccs1	ArabianCamel,Bactriancamel,WildBactrianCamel	Giraffe,Pronghorn	back	0.0154588	0.0153399	0.0757153	154.35	4.7586	10.4171	0.0904	179.958	179.958
rna172	785121	LOC785121	337959	KRTAP13-2	87	0.999915	86	R	R	Y,H,C,S	is_ccs1	ArabianCamel,Bactriancamel,WildBactrianCamel	Giraffe,Pronghorn	back	0.0282413	0.0278463	0.0883502	50.7771	17713.9	9.1942	1.6306	23.4053	17713.9
rna17831	618896	ADM2	79924	ADM2	30	0.999841	29	I	I	A,V	is_ccs1	ArabianCamel,Bactriancamel,WildBactrianCamel	Giraffe,Pronghorn	back	0.0142594	0.0141582	0.0741515	1265.9	0.2289	297.382	0.0336	2726.24	2726.24
rna28396	518778	TXLNB	167838	TXLNB	25	0.999934	24	R	G	S	is_ccs2	ArabianCamel,Bactriancamel,WildBactrianCamel	Giraffe,Pronghorn	back	0.00512357	0.00511047	0.0674215	0.0861	0.1578	4137.56	9439.88	0.0795	9439.88
rna29275	616872	MTX3	345778	MTX3	117	0.999829	116	Q	Q	R	is_ccs1	ArabianCamel,Bactriancamel,WildBactrianCamel	Giraffe,Pronghorn	back	0.0112458	0.0111828	0.0693712	5.12619e+06	0	98149.4	1.4332	5.11457e+06	5.12619e+06
rna30669	614323	CA12	771	CA12	327	0.99997	326	T	I	K	is_ccs2	ArabianCamel,Bactriancamel,WildBactrianCamel	Giraffe,Pronghorn	back	0.00511116	0.00509812	0.0674215	0.2405	0.0084	383.083	941.423	0.2482	941.423
rna31441	538889	ZBTB25	7597	ZBTB25	293	0.999926	292	C	H	R	is_ccs2	ArabianCamel,Bactriancamel,WildBactrianCamel	Giraffe,Pronghorn	back	0.00393226	0.00392454	0.0626013	228.64	490.923	12420.2	71366.8	175.946	71366.8
rna31899	615419	VASH1	22846	VASH1	53	0.999504	52	V	V	I	is_ccs1	ArabianCamel,Bactriancamel,WildBactrianCamel	Giraffe,Pronghorn	back	0.0078344	0.00780379	0.0674215	8555.68	57.4284	2373.94	0	6497.63	8555.68
rna37931	510512	ZNF438	220929	ZNF438	468	0.999757	467	A	A	T,S	is_ccs1	ArabianCamel,Bactriancamel,WildBactrianCamel	Giraffe,Pronghorn	back	0.00850055	0.00846452	0.0674215	36.2141	48.0525	4.4404	0.0013	19.5922	48.0525
rna39960	539295	ARFGEF2	10564	ARFGEF2	1404	0.999922	1403	S	S	N	is_ccs1	ArabianCamel,Bactriancamel,WildBactrianCamel	Giraffe,Pronghorn	back	0.0154984	0.0153789	0.0757153	1002.96	0.2846	141.19	0.0275	992.608	1002.96
rna45035	539227	RAB3GAP2	25782	RAB3GAP2	1199	0.999874	1198	A	A	T,S	is_ccs1	ArabianCamel,Bactriancamel,WildBactrianCamel	Giraffe,Pronghorn	back	0.00663044	0.00660851	0.0674215	3231.03	34.0336	569.457	0.2927	2597.74	3231.03
rna45246	507289	SCCPDH	51097	SCCPDH	394	0.999967	393	V	V	A	is_ccs1	ArabianCamel,Bactriancamel,WildBactrianCamel	Giraffe,Pronghorn	back	0.0264955	0.0261476	0.0877982	15531.7	0	4260.16	0.2921	20891	20891
rna49095	101905136	LOC101905136	107985532	LOC107985532	109	0.999655	108	K	K	R	is_ccs1	ArabianCamel,Bactriancamel,WildBactrianCamel	Giraffe,Pronghorn	back	0.0241168	0.0238283	0.0841766	3307.35	0.0229	440.054	0.1086	4635.56	4635.56
rna51707	282862	BCAM	4059	BCAM	550	0.999982	549	R	R	G,S	is_ccs1	ArabianCamel,Bactriancamel,WildBactrianCamel	Giraffe,Pronghorn	back	0.0147903	0.0146814	0.0756818	222.509	49.1169	44.5805	1.7228	232.736	232.736
rna52868	518466	TMEM86B	255043	TMEM86B	166	0.999706	165	M	M	T,V,L	is_ccs1	ArabianCamel,Bactriancamel,WildBactrianCamel	Giraffe,Pronghorn	back	0.00402094	0.00401287	0.0626013	91.2812	45.1176	64.516	3.137	102.762	102.762
rna59554	513924	PSTPIP1	9051	PSTPIP1	272	0.999934	271	G	R	S	is_ccs2	ArabianCamel,Bactriancamel,WildBactrianCamel	Giraffe,Pronghorn	back	0.00866339	0.00862597	0.0674215	0.0001	0.0007	80.8023	5702.11	0.0001	5702.11
rna62198	505543	STAB1	23166	STAB1	810	0.999951	809	P	P	Q,H,L	is_ccs1	ArabianCamel,Bactriancamel,WildBactrianCamel	Giraffe,Pronghorn	back	0.0216566	0.0214238	0.0810692	52.9159	1091.26	1.8242	0.044	10.2084	1091.26
rna63413	510995	KIFC1	3833	KIFC1	510	0.999934	509	H	G	R	is_ccs2	ArabianCamel,Bactriancamel,WildBactrianCamel	Giraffe,Pronghorn	back	0.0160995	0.0159706	0.0757153	0.644	0.0054	574.218	1426.33	0.5928	1426.33
rna63622	618875	C23H6orf222	389384	C6orf222	426	0.999929	425	L	A	P	is_ccs2	ArabianCamel,Bactriancamel,WildBactrianCamel	Giraffe,Pronghorn	back	0.0322764	0.0317611	0.0927492	0.1207	0.0395	100.195	258.445	0.1665	258.445
rna65096	519345	SLC17A3	10786	SLC17A3	91	0.999941	90	T	L	P	is_ccs2	ArabianCamel,Bactriancamel,WildBactrianCamel	Giraffe,Pronghorn	back	0.0134737	0.0133834	0.0731015	2.6298	0.0202	18035.4	35067.8	4.192	35067.8
rna65909	511041	ELP2	55250	ELP2	749	0.999504	748	V	V	I	is_ccs1	ArabianCamel,Bactriancamel,WildBactrianCamel	Giraffe,Pronghorn	back	0.03121	0.030728	0.0906973	458.697	0.3067	151.015	0.2978	466.733	466.733
rna66058	518030	TAF4B	6875	TAF4B	327	0.999911	326	A	A	T,V	is_ccs1	ArabianCamel,Bactriancamel,WildBactrianCamel	Giraffe,Pronghorn	back	0.0200236	0.000197816	0.0120668	305.927	638.247	127.372	61.3735	269.288	638.247
rna69689	281120	DNTT	1791	DNTT	145	0.999949	144	S	S	D,G	is_ccs1	ArabianCamel,Bactriancamel,WildBactrianCamel	Giraffe,Pronghorn	back	0.0283827	0.0279837	0.0883502	5413.23	101.947	1409.89	23.5165	5737.33	5737.33
rna69716	510761	SLIT1	6585	SLIT1	16	0.999977	15	V	V	T,A	is_ccs1	ArabianCamel,Bactriancamel,WildBactrianCamel	Giraffe,Pronghorn	back	0.0179782	0.0178176	0.0776309	265.923	0.0326	67.3384	0.0061	777.909	777.909
rna75047	100851894	LRRC56	115399	LRRC56	43	0.999881	42	R	R	H,G	is_ccs1	ArabianCamel,Bactriancamel,WildBactrianCamel	Giraffe,Pronghorn	back	0	0	0	4.4509	740.959	0.4718	0.3707	1.2248	740.959
rna75920	508380	TMEM187	8269	TMEM187	253	0.99991	252	A	A	T	is_ccs1	ArabianCamel,Bactriancamel,WildBactrianCamel	Giraffe,Pronghorn	back	0.00596661	0.00594885	0.0674215	1664.42	1.9996	217.327	0.3655	1816.21	1816.21
rna10319	535006	TRIT1	54802	TRIT1	12	0.999793	11	G	Q	R	is_ccs2	ArabianCamel,Bactriancamel,WildBactrianCamel	Cattle,Sitatunga	back	0.0279661	0.0275786	0.0883502	0.0059	0	14542.7	4.50233e+06	0.0059	4.50233e+06
rna15533	537782	APAF1	317	APAF1	660	0.999286	659	K	K	R	is_ccs1	ArabianCamel,Bactriancamel,WildBactrianCamel	Cattle,Sitatunga	back	0.0124603	0.012383	0.0717707	55.0629	0	9.8751	0	56.6857	56.6857
rna15646	615510	PARPBP	55010	PARPBP	400	0.999985	399	P	P	L,S	is_ccs1	ArabianCamel,Bactriancamel,WildBactrianCamel	Cattle,Sitatunga	back	0.00708391	0.00705888	0.0674215	844.92	0	193.897	0.0624	1021.79	1021.79
rna15665	101906090	C5H12orf42	374470	C12orf42	172	0.999851	171	V	T	A	is_ccs2	ArabianCamel,Bactriancamel,WildBactrianCamel	Cattle,Sitatunga	back	0.0115344	0.0114681	0.0700263	0.7985	0.0275	5116.88	4749.37	1.0518	5116.88
rna16023	505234	FGD4	121512	FGD4	79	0.999596	78	P	P	S,A	is_ccs1	ArabianCamel,Bactriancamel,WildBactrianCamel	Cattle,Sitatunga	back	0.0186489	0.0184761	0.0776309	7211.03	0.4785	11157.3	0.0031	107552	107552
rna16262	533006	RECQL	5965	RECQL	114	0.999892	113	T	T	R	is_ccs1	ArabianCamel,Bactriancamel,WildBactrianCamel	Cattle,Sitatunga	back	0.0345245	0.0339353	0.0955409	2262.73	39.8616	286.399	0.0165	2222.42	2262.73
rna16275	404160	SLCO1B3	28234	SLCO1B3	425	0.999677	424	M	M	L,V,I	is_ccs1	ArabianCamel,Bactriancamel,WildBactrianCamel	Cattle,Sitatunga	back	0.0226577	0.022403	0.0823263	103058	50196.7	222.039	0.0519	14470.6	103058
rna16970	527026	B4GALNT3	283358	B4GALNT3	621	0.999781	620	I	G	V	is_ccs2	ArabianCamel,Bactriancamel,WildBactrianCamel	Cattle,Sitatunga	back	0.0093902	0.00934625	0.0675186	1.227	0.5817	176.934	147.816	1.0658	176.934
rna17289	101906018	LOC101906018	#N/A	#N/A	33	0.999781	32	I	G	V	is_ccs2	ArabianCamel,Bactriancamel,WildBactrianCamel	Cattle,Sitatunga	back	0.0171057	0.0169602	0.0771704	0.0002	0.0001	6071.64	68745.9	0.0003	68745.9
rna17322	112441544	LOC112441544	8911	CACNA1I	389	0.999739	388	S	S	G	is_ccs1	ArabianCamel,Bactriancamel,WildBactrianCamel	Cattle,Sitatunga	back	0.0157196	0.0155967	0.0757153	62.535	34.5074	20.2099	291.851	81.2686	291.851
rna2479	525947	LOC525947	7018	TF	341	0.999916	340	V	V	M,G,T,A,S	is_ccs1	ArabianCamel,Bactriancamel,WildBactrianCamel	Cattle,Sitatunga	back	0.00727383	0.00724744	0.0674215	333.085	1953.81	13.4612	0.5041	77.8967	1953.81
rna25752	513828	TBC1D2	55357	TBC1D2	384	0.999621	383	Q	Q	R	is_ccs1	ArabianCamel,Bactriancamel,WildBactrianCamel	Cattle,Sitatunga	back	0.0317317	0.0312335	0.0919421	85.7569	0.3031	18.9639	0.0426	98.2559	98.2559
rna26673	104969469	LOC104969469	#N/A	#N/A	58	0.999495	57	E	E	K,A	is_ccs1	ArabianCamel,Bactriancamel,WildBactrianCamel	Cattle,Sitatunga	back	0.0106476	0.0105911	0.0685143	18.5404	243.054	0.5176	0.1941	2.3114	243.054
rna28348	533077	PEX7	5191	PEX7	188	0.999621	187	Q	Q	R	is_ccs1	ArabianCamel,Bactriancamel,WildBactrianCamel	Cattle,Sitatunga	back	0.00339411	0.00338836	0.0626013	7610.35	0.5375	2168.67	0	8654.49	8654.49
rna37685	513129	KIAA1217	56243	KIAA1217	1149	0.999878	1148	I	I	M,T,N	is_ccs1	ArabianCamel,Bactriancamel,WildBactrianCamel	Cattle,Sitatunga	back	0.0380895	0.0373732	0.0997367	28.8508	288.844	2.7428	0.3015	10.2307	288.844
rna37931	510512	ZNF438	220929	ZNF438	589	0.999735	588	R	H	Q	is_ccs2	ArabianCamel,Bactriancamel,WildBactrianCamel	Cattle,Sitatunga	back	0.00850055	0.00846452	0.0674215	0.004	0.0001	110.496	92.1995	0.0313	110.496
rna40126	785799	ZNF7	7553	ZNF7	157	0.999608	156	V	G	A	is_ccs2	ArabianCamel,Bactriancamel,WildBactrianCamel	Cattle,Sitatunga	back	0.0170845	0.0169394	0.0771704	0.0076	0.0485	2300.7	7782.36	0.0009	7782.36
rna45246	507289	SCCPDH	51097	SCCPDH	374	0.999692	373	S	S	P	is_ccs1	ArabianCamel,Bactriancamel,WildBactrianCamel	Cattle,Sitatunga	back	0.0264955	0.0261476	0.0877982	3.7832	0.2087	0.8747	1.3972	4.7242	4.7242
rna45550	100848408	C16H1orf167	284498	C1orf167	46	0.999621	45	Q	Q	R	is_ccs1	ArabianCamel,Bactriancamel,WildBactrianCamel	Cattle,Sitatunga	back	0.230669	0.0228461	0.0833388	3.7822	0.0037	1.3883	1.42	4.5115	4.5115
rna47191	536009	TTC29	83894	TTC29	319	0.999918	318	T	K	M	is_ccs2	ArabianCamel,Bactriancamel,WildBactrianCamel	Cattle,Sitatunga	back	0.0304801	0.0300203	0.0897138	0	0	22071.3	4.76641e+06	0	4.76641e+06
rna49441	509624	KARS	3735	KARS	7	0.99958	6	I	A	V	is_ccs2	ArabianCamel,Bactriancamel,WildBactrianCamel	Cattle,Sitatunga	back	0.0163377	0.016205	0.0757153	0.0068	0	2852.55	17557.4	0.0054	17557.4
rna49584	538506	GSE1	23199	GSE1	68	0.99997	67	R	R	A,G	is_ccs1	ArabianCamel,Bactriancamel,WildBactrianCamel	Cattle,Sitatunga	back	0.0308386	0.030368	0.0901191	69.3476	0.0686	13.8134	0.0524	50.3691	69.3476
rna50557	506501	TERF2	7014	TERF2	332	0.999843	331	T	T	A	is_ccs1	ArabianCamel,Bactriancamel,WildBactrianCamel	Cattle,Sitatunga	back	0.00711738	0.00709211	0.0674215	122061	3.9264	101856	6.0044	484701	484701
rna59135	404191	ANPEP	290	ANPEP	115	0.999864	114	T	T	S,F,A	is_ccs1	ArabianCamel,Bactriancamel,WildBactrianCamel	Cattle,Sitatunga	back	0.0202508	0.0200471	0.0797526	3935.28	33457.9	6.5487	1.0516	33.9092	33457.9
rna59156	510140	SEMA4B	10509	SEMA4B	439	0.999912	438	P	F	S	is_ccs2	ArabianCamel,Bactriancamel,WildBactrianCamel	Cattle,Sitatunga	back	0.0173376	0.0171881	0.0771704	0.0164	0.1576	13.1222	58.6802	0.0155	58.6802
rna59702	515911	STRA6	64220	STRA6	31	0.999846	30	A	E	G	is_ccs2	ArabianCamel,Bactriancamel,WildBactrianCamel	Cattle,Sitatunga	back	0.0222496	0.022004	0.0816876	5.1294	21.1448	16.5022	12.2537	0.015	21.1448
rna59810	788930	GPR33	2856	GPR33	232	0.999868	231	R	R	K,N	is_ccs1	ArabianCamel,Bactriancamel,WildBactrianCamel	Cattle,Sitatunga	back	0.0369922	0.0363163	0.0993263	14909.1	0.5029	9266.32	5.4097	31605.6	31605.6
rna65721	519449	ZNF516	9658	ZNF516	18	0.998431	17	S	S	T,P,G	is_ccs1	ArabianCamel,Bactriancamel,WildBactrianCamel	Cattle,Sitatunga	back	0.00018713	0.000187112	0.0120668	42.8015	127.921	0.2895	0.6397	0.3192	127.921
rna69663	785845	CC2D2B	387707	CC2D2B	1144	0.999645	1143	R	R	Q	is_ccs1	ArabianCamel,Bactriancamel,WildBactrianCamel	Cattle,Sitatunga	back	0.0361748	0.0355283	0.0982991	531.034	8.8899	117.204	0.173	524.383	531.034
rna70001	513279	PPRC1	23082	PPRC1	763	0.99974	762	T	T	S,G	is_ccs1	ArabianCamel,Bactriancamel,WildBactrianCamel	Cattle,Sitatunga	back	0.0269495	0.0265896	0.0881189	1040.38	0.2211	376.027	0.012	1171.56	1171.56
rna71875	510413	TAF5L	27097	TAF5L	107	0.999843	106	S	T	N	is_ccs2	ArabianCamel,Bactriancamel,WildBactrianCamel	Cattle,Sitatunga	back	0.00754757	0.00751916	0.0674215	3.251	1.5638	922.069	1079.18	2.7489	1079.18
rna73420	532018	TMEM86A	144110	TMEM86A	86	0.99822	85	I	I	L,V	is_ccs1	ArabianCamel,Bactriancamel,WildBactrianCamel	Cattle,Sitatunga	back	0	0	0	1555.64	646.769	701.518	0	1767.6	1767.6
rna9493	506223	OMA1	115209	OMA1	228	0.999591	227	E	R	K	is_ccs2	ArabianCamel,Bactriancamel,WildBactrianCamel	Cattle,Sitatunga	back	0.016203	0.0160724	0.0757153	2.9229	2.7791	12871.9	47823.4	1.3096	47823.4
rna12224	535589	TAX1BP1	8887	TAX1BP1	182	0.999367	181	C	N	S	is_ccs2	Alpaca,llama	DefassaWaterbuck,Lechwe	back	0.033475	0.0329209	0.0937844	0	0	209.844	108.794	0	209.844
rna25502	527643	TESK1	7016	TESK1	241	0.999317	240	G	Q	R	is_ccs2	Alpaca,llama	DefassaWaterbuck,Lechwe	back	0.023546	0.0232709	0.0837753	0	0	2958.64	10508.2	0	10508.2
rna29809	515594	PRMT5	10419	PRMT5	350	0.998828	349	K	D	E	is_ccs2	Alpaca,llama	DefassaWaterbuck,Lechwe	back	0.00149831	0.00149719	0.0587112	0	0	6286.45	inf	0	6286.45
rna30487	515078	TMEM62	80021	TMEM62	434	0.99966	433	M	M	A,T,V	is_ccs1	Alpaca,llama	DefassaWaterbuck,Lechwe	back	0.00860523	0.00856831	0.0674215	26091.3	101574	14461.8	3.7743e+07	3604.67	3.7743e+07
rna3141	281013	ASMT	438	ASMT	39	0.999572	38	R	R	E,P,Q,-	is_ccs1	Alpaca,llama	DefassaWaterbuck,Lechwe	back	0.0161363	0.0160068	0.0757153	2922.3	729.746	196.216	0	2905.54	2922.3
rna34550	281780	GGTA1	360203	GLT6D1	102	0.999307	101	R	L	Q	is_ccs2	Alpaca,llama	DefassaWaterbuck,Lechwe	back	0.0272844	0.0269155	0.0883502	0.0001	0	585.863	345.115	0.0009	585.863
rna37726	516469	ENKUR	219670	ENKUR	144	0.998656	143	L	I	V	is_ccs2	Alpaca,llama	DefassaWaterbuck,Lechwe	back	0.0153708	0.0152533	0.0757153	0	0	12962.6	4692.01	0	12962.6
rna43876	540545	SYT13	57586	SYT13	123	0.998196	122	N	G	D	is_ccs2	Alpaca,llama	DefassaWaterbuck,Lechwe	back	0.00807042	0.00803794	0.0674215	0	0.0001	19.6563	7.8746	0	19.6563
rna44857	281652	C4BPB	725	C4BPB	40	0.999432	39	A	M	V	is_ccs2	Alpaca,llama	DefassaWaterbuck,Lechwe	back	0.0201272	0.019926	0.0795593	0.0023	117.343	660.881	inf	0.0016	660.881
rna45064	505051	TAF1A	9015	TAF1A	449	0.999091	448	S	D	G	is_ccs2	Alpaca,llama	DefassaWaterbuck,Lechwe	back	0.0292497	0.0288261	0.0883502	0	0	350915	1.42081e+07	0	1.42081e+07
rna45401	517828	LOC517828	2328	FMO3	325	0.9998	324	R	R	-,W	is_ccs1	Alpaca,llama	DefassaWaterbuck,Lechwe	back	0.0341955	0.0336174	0.0949005	7221.88	0.0082	1434.37	4374.58	5986.35	7221.88
rna46661	505371	TRAF3IP3	80342	TRAF3IP3	46	0.999127	45	R	H	Q	is_ccs2	Alpaca,llama	DefassaWaterbuck,Lechwe	back	0.0273362	0.0269659	0.0883502	0.5064	0	855.897	845.621	2.4593	855.897
rna47005	532175	RBM46	166863	RBM46	7	0.998453	6	E	N	D	is_ccs2	Alpaca,llama	DefassaWaterbuck,Lechwe	back	0.0241528	0.0238634	0.0841766	0	0	94635.2	53865.9	0	94635.2
rna49130	526295	AIFM3	150209	AIFM3	323	0.998834	322	T	V	I	is_ccs2	Alpaca,llama	DefassaWaterbuck,Lechwe	back	0.0134786	0.0133882	0.0731015	0.1924	1.7127	86.8883	6705.8	0.1638	6705.8
rna60950	510330	DYNC1LI1	51143	DYNC1LI1	62	0.998916	61	R	N	K	is_ccs2	Alpaca,llama	DefassaWaterbuck,Lechwe	back	0.0106645	0.0106079	0.0685143	0	0	2299.89	164912	0	164912
rna62717	112443487	LOC112443487	100288960	PRSS43	28	0.999709	27	L	S	F	is_ccs2	Alpaca,llama	DefassaWaterbuck,Lechwe	back	0.0220751	0.0218332	0.0815403	48.0243	15.2225	107558	93735.6	122.067	107558
rna66518	528378	HAUS1	115106	HAUS1	77	0.999375	76	T	M	I	is_ccs2	Alpaca,llama	DefassaWaterbuck,Lechwe	back	0.0125639	0.0124853	0.0717707	0	0	1.22072e+08	1.48355e+08	0	1.48355e+08
rna6697	617485	SH2D1B	117157	SH2D1B	21	0.999367	20	E	M	K	is_ccs2	Alpaca,llama	DefassaWaterbuck,Lechwe	back	0.0208316	0.0206161	0.0799659	0	0	3996.73	4.8409e+06	0	4.8409e+06
rna70790	534925	EEF1AKMT2	399818	METTL10	17	0.999621	16	R	E	G	is_ccs2	Alpaca,llama	DefassaWaterbuck,Lechwe	back	0.0329315	0.0323952	0.0933917	0	0	95074.2	589416	0	589416
rna72843	112444747	LOC112444747	195977	ANTXRL	64	0.997926	63	P	P	T,S	is_ccs1	Alpaca,llama	DefassaWaterbuck,Lechwe	back	0	0	0	37978.1	37601.3	1794.02	3.8142	27398.2	37978.1
rna7761	505645	TMOD4	29765	TMOD4	212	0.998491	211	V	L	M	is_ccs2	Alpaca,llama	DefassaWaterbuck,Lechwe	back	0.0034654	0.0034594	0.0626013	0	0	196796	8.89654e+08	0	8.89654e+08
rna9570	509775	TMEM59	9528	TMEM59	24	0.997961	23	I	L	M	is_ccs2	Alpaca,llama	DefassaWaterbuck,Lechwe	back	0.0183255	0.0181586	0.0776309	0	0	127774	82968.3	0	127774
rna12324	535171	MPP6	51678	MPP6	300	0.999251	299	I	I	A,V	is_ccs1	ArabianCamel,Bactriancamel,WildBactrianCamel	DefassaWaterbuck,Lechwe	back	0.033031	0.0324915	0.0833731	2.50429e+07	53557	41467.6	0	2.47808e+07	2.50429e+07
rna12671	539985	GCC1	79571	GCC1	125	0.999597	124	L	A	P	is_ccs2	ArabianCamel,Bactriancamel,WildBactrianCamel	DefassaWaterbuck,Lechwe	back	0.114823	0.108476	0.0770303	0	0	24.5633	2043.92	0	2043.92
rna12703	539444	FAM71F1	84691	FAM71F1	219	0.999023	218	G	G	S,N	is_ccs1	ArabianCamel,Bactriancamel,WildBactrianCamel	DefassaWaterbuck,Lechwe	back	0.0728939	0.0703006	0.0771704	1.62344e+07	7022.3	7282.37	0	2.24433e+07	2.24433e+07
rna12722	515624	KCP	375616	KCP	1409	0.999616	1408	E	E	G,R	is_ccs1	ArabianCamel,Bactriancamel,WildBactrianCamel	DefassaWaterbuck,Lechwe	back	0.321704	0.275088	0.0892046	149.704	0.1138	26.1918	0.8371	173.84	173.84
rna13590	508513	UBE3C	9690	UBE3C	26	0.99948	25	T	M	I	is_ccs2	ArabianCamel,Bactriancamel,WildBactrianCamel	DefassaWaterbuck,Lechwe	back	0.0497686	0.0485504	0.0933917	216.407	0.6914	2.4194	0.6886	191.676	216.407
rna16814	541169	NOP2	4839	NOP2	570	0.999335	569	R	P	Q	is_ccs2	ArabianCamel,Bactriancamel,WildBactrianCamel	DefassaWaterbuck,Lechwe	back	0.0927521	0.0885806	0.0810692	0.5714	0.1276	825.23	78773.7	0.7552	78773.7
rna25005	536863	MPDZ	8777	MPDZ	441	0.997849	440	P	P	S,A	is_ccs1	ArabianCamel,Bactriancamel,WildBactrianCamel	DefassaWaterbuck,Lechwe	back	0.109533	0.103747	0.0897138	50.4284	178.267	32.845	1937.41	12.8699	1937.41
rna2845	510855	PCNT	5116	PCNT	1361	0.99896	1360	S	D	N	is_ccs2	ArabianCamel,Bactriancamel,WildBactrianCamel	DefassaWaterbuck,Lechwe	back	0.518573	0.40463	0.0781435	0.9945	0.0249	0.6581	8.4125	1.1198	8.4125
rna32423	616986	REV1	51455	REV1	227	0.999675	226	Q	L	P	is_ccs2	ArabianCamel,Bactriancamel,WildBactrianCamel	DefassaWaterbuck,Lechwe	back	0.110737	0.104826	0.0930949	1.903	0.034	0.7621	0.4531	2.2109	2.2109
rna33587	281190	GGCX	2677	GGCX	649	0.999606	648	M	K	T	is_ccs2	ArabianCamel,Bactriancamel,WildBactrianCamel	DefassaWaterbuck,Lechwe	back	0.00857229	0.00853565	0.0674215	0	0	18.2572	14063.7	0	14063.7
rna35265	534284	SETX	23064	SETX	634	0.998751	633	L	V	M	is_ccs2	ArabianCamel,Bactriancamel,WildBactrianCamel	DefassaWaterbuck,Lechwe	back	0.277599	0.2424	0.0704342	420.086	645.938	172.902	336.505	424.537	645.938
rna36307	507069	BRCA2	675	BRCA2	879	0.99844	878	N	N	D	is_ccs1	ArabianCamel,Bactriancamel,WildBactrianCamel	DefassaWaterbuck,Lechwe	back	0.936488	0.607998	0.0674215	331.344	72.8881	258.097	4056.12	399.935	4056.12
rna37007	101906350	CCDC168	643677	CCDC168	1845	0.99947	1844	G	G	S,F	is_ccs1	ArabianCamel,Bactriancamel,WildBactrianCamel	DefassaWaterbuck,Lechwe	back	1.2507	0.131689	0.0982991	2.3017	6.7996	1.855	116.701	2.9246	116.701
rna44820	533216	IKBKE	9641	IKBKE	585	0.99849	584	Q	K	R	is_ccs2	ArabianCamel,Bactriancamel,WildBactrianCamel	DefassaWaterbuck,Lechwe	back	0.0333869	0.0328357	0.0717707	0	0	32.3722	1620.63	0	1620.63
rna45493	540683	VPS13D	55187	VPS13D	1151	0.999975	1150	I	I	A,T	is_ccs1	ArabianCamel,Bactriancamel,WildBactrianCamel	DefassaWaterbuck,Lechwe	back	0.145914	0.00966446	0.0937844	319.113	14.2106	61.5455	0.0026	258.817	319.113
rna46385	100048947	RNASEL	6041	RNASEL	418	0.996443	417	K	K	S,G,R	is_ccs1	ArabianCamel,Bactriancamel,WildBactrianCamel	DefassaWaterbuck,Lechwe	back	0.444319	0.358739	0.0675212	40.2551	9.579	9.8092	1.1747	48.6655	48.6655
rna46454	540872	TRMT1L	81627	TRMT1L	97	0.999994	96	F	F	S,T	is_ccs1	ArabianCamel,Bactriancamel,WildBactrianCamel	DefassaWaterbuck,Lechwe	back	0.0340514	0.0334782	0.0675212	2374.3	33.5029	692.517	4244.16	2635.24	4244.16
rna46894	107131237	PPP1R12B	4660	PPP1R12B	486	0.999509	485	E	T	K	is_ccs2	ArabianCamel,Bactriancamel,WildBactrianCamel	DefassaWaterbuck,Lechwe	back	0.214272	0.192871	0.0971534	0.0914	0.2148	27.0146	83.019	0.0765	83.019
rna47106	535511	SH3D19	152503	SH3D19	519	0.999212	518	S	S	G,N	is_ccs1	ArabianCamel,Bactriancamel,WildBactrianCamel	DefassaWaterbuck,Lechwe	back	0.0803357	0.0771935	0.0949005	0.5219	132.483	0.0422	0.0069	0.1421	132.483
rna49922	514467	SALL1	6299	SALL1	484	0.999876	483	L	L	P	is_ccs1	ArabianCamel,Bactriancamel,WildBactrianCamel	DefassaWaterbuck,Lechwe	back	0.0289027	0.028489	0.0330878	4.9635	0.0635	1.2658	0	4.1268	4.9635
rna50044	613577	HERPUD1	9709	HERPUD1	30	0.999807	29	C	S	R	is_ccs2	ArabianCamel,Bactriancamel,WildBactrianCamel	DefassaWaterbuck,Lechwe	back	0.0429868	0.0420759	0.08918	0	0	4374.37	5262.86	0	5262.86
rna50221	414735	CDH5	1003	CDH5	10	0.999908	9	V	V	A,T	is_ccs1	ArabianCamel,Bactriancamel,WildBactrianCamel	DefassaWaterbuck,Lechwe	back	0.0050846	0.0050717	0.0674215	184.033	5.5423	50.3637	31.8118	238.434	238.434
rna50748	518738	GPATCH1	55094	GPATCH1	693	0.999278	692	R	H	Q	is_ccs2	ArabianCamel,Bactriancamel,WildBactrianCamel	DefassaWaterbuck,Lechwe	back	0.0643898	0.0623606	0.0883502	0.0637	0.4393	61.983	1607.54	0.0543	1607.54
rna51380	527083	LOC527083	1553	CYP2A13	265	0.997655	264	V	V	I	is_ccs1	ArabianCamel,Bactriancamel,WildBactrianCamel	DefassaWaterbuck,Lechwe	back	0.0755945	0.0728079	0.0674215	26548.1	0	4427.75	0	23973.1	26548.1
rna63150	510120	MCM2	4171	MCM2	6	0.999952	5	L	L	P,R	is_ccs1	ArabianCamel,Bactriancamel,WildBactrianCamel	DefassaWaterbuck,Lechwe	back	0.00992436	0.00987528	0.0881189	58.9563	2.9422	8.506	0	46.589	58.9563
rna64418	505555	VWA7	80737	VWA7	718	0.999758	717	L	S	F	is_ccs2	ArabianCamel,Bactriancamel,WildBactrianCamel	DefassaWaterbuck,Lechwe	back	0.134802	0.126111	0.0757153	0	0	664.436	770.757	0	770.757
rna65154	504870	ACOT13	55856	ACOT13	69	0.994036	68	M	M	L,I	is_ccs1	ArabianCamel,Bactriancamel,WildBactrianCamel	DefassaWaterbuck,Lechwe	back	0.388623	0.32201	0.0757153	109224	523691	1519.72	664.327	6068.01	523691
rna65668	100335435	HSBP1L1	440498	HSBP1L1	18	0.99902	17	A	S	G	is_ccs2	ArabianCamel,Bactriancamel,WildBactrianCamel	DefassaWaterbuck,Lechwe	back	0.158806	0.146838	0.0675212	0	0	1328.96	755.355	0	1328.96
rna7063	517126	FCRL5	83416	FCRL5	60	0.995702	59	H	H	S,N,Y,P,R,T	is_ccs1	ArabianCamel,Bactriancamel,WildBactrianCamel	DefassaWaterbuck,Lechwe	back	0.293139	0.254081	0.0883502	156.918	4.4218	117.867	292.872	264.785	292.872
rna70849	784700	FAM196A	642938	FAM196A	170	0.999201	169	S	T	P	is_ccs2	ArabianCamel,Bactriancamel,WildBactrianCamel	DefassaWaterbuck,Lechwe	back	0.11586	0.1094	0.0949005	0.8152	0.7311	134.864	68.0971	0.8364	134.864
rna7263	526125	GON4L	54856	GON4L	154	0.999304	153	S	S	A	is_ccs1	ArabianCamel,Bactriancamel,WildBactrianCamel	DefassaWaterbuck,Lechwe	back	0.0641945	0.0621774	0.0674215	6.0532	40.6993	1.4987	0.0199	6.0304	40.6993
rna72841	782834	ANTXRL	195977	ANTXRL	116	0.999134	115	R	R	K,I	is_ccs1	ArabianCamel,Bactriancamel,WildBactrianCamel	DefassaWaterbuck,Lechwe	back	0.314212	0.269636	0.0897138	92.3667	0.0682	19.1898	0.4325	113.133	113.133
rna75690	100139912	MAMLD1	10046	MAMLD1	874	0.999827	873	P	P	Q,K,W	is_ccs1	ArabianCamel,Bactriancamel,WildBactrianCamel	DefassaWaterbuck,Lechwe	back	0.127318	0.119547	0.0717707	78.1877	0.6695	29.6221	13.5286	94.7169	94.7169
rna9419	536993	PATJ	10207	PATJ	1138	0.999691	1137	T	E	A	is_ccs2	ArabianCamel,Bactriancamel,WildBactrianCamel	DefassaWaterbuck,Lechwe	back	0.203616	0.184225	0.0883502	0	0	39.3983	711.44	0	711.44

## Sheet: Tables7
Table.S7 The positive selected sites of convergent genes calculated by MEME
gene	Codon	alpha	beta+	LRT	P	site
RELN	300	0	266.347	6.836	0.0147	[1]aAa>aGa.Aaa>Gaa
RELN	351	0	292.411	7.715	0.0094	[3]Gtc>Atc
LOC104972026	561	0	27.676	6.488	0.0176	[1]Gtc>Atc
LHFPL3	1502	0	19.319	5.495	0.0292	[1]agG>agC
LOC107132398	2631	0	24.235	5.388	0.0309	[1]Gat>Aat
KRTAP7-1	44	0.646	25.415	7.901	0.0085	[1]Ggt>Agt.gGt>gAt.ggT>ggC
KRTAP7-1	47	0	23.932	4.921	0.0393	[1]Tgc>Cgc
GTSE1	2	0	201.495	12.542	0.0008	[2]aAg>aCg
GTSE1	8	1.242	7908.53	9.009	0.0049	[1]caG>caA.cAg>cGg.Cag>Gag.CaG>NaN.GAG>CG...
GTSE1	33	0	135.538	6.554	0.017	[2]aCc>aTc
GTSE1	62	0	14.687	6.822	0.0148	[1]cGg>cAg.cGg>cCg.Cgg>Tgg
GTSE1	68	0	98.983	5.948	0.0232	[2]Agc>Ggc
GTSE1	69	1.185	23.858	6.509	0.0174	[1]tcG>tcT.tCg>tTg.tcT>tcC.tGG>tCN.tTg>tG...
GTSE1	73	3.111	8869.84	7.497	0.0105	[2]GcC>CcG
GTSE1	74	0	1005.15	20.413	0	[2]GTg>CGg
GTSE1	75	2.075	10000.000...	8.096	0.0077	[1]aaG>aaT.CaA>AaG.cAA>cGG.Gaa>Caa.gaA>ga...
GTSE1	77	0	10000.000...	5.189	0.0342	[1]Gaa>Naa.GCA>AGG.gCa>gAa
GTSE1	79	0	4483.34	10.411	0.0024	[2]aGC>aCG
GTSE1	80	0	1175.67	14.637	0.0003	[1]GAC>CGA.GAc>CGc.GAc>TGc
GTSE1	202	0	17.334	10.599	0.0022	[2]Ggg>Agg
GTSE1	206	0	10.396	5.711	0.0261	[2]gTg>gGg
GTSE1	332	0	15.159	7.055	0.0131	[1]Cca>Tca
GTSE1	428	0	248.061	15.851	0.0002	[2]agT>agG.Agt>Ggt
GTSE1	498	0	14.037	5.443	0.03	[1]cAg>cGg.cGg>cTg
GTSE1	553	1.747	699.915	4.462	0.0498	[4]cCg>cTg
GTSE1	602	0	583.093	8.328	0.0069	[1]cGc>cAc
GTSE1	660	0	13.09	5.868	0.0241	[4]Ggc>Agc
GTSE1	741	0	14.623	5.785	0.0252	[2]Ccc>Gcc
GTSE1	752	1.356	172.349	5.494	0.0292	[2]Agg>Ggg
GTSE1	771	0	47.09	7.089	0.0129	[1]cTg>cCg
GTSE1	788	0	10000.000...	25.219	0	[1]Gag>Cag.GAG>CCC
GTSE1	789	0	131.918	6.602	0.0166	[1]GTG>ANN.Gtg>Atg.gTg>gCg
NR2E3	5	0	205.719	7.953	0.0083	[1]aAc>aGc.AAC>GGG
NR2E3	14	0	10.721	4.797	0.0419	[1]gTg>gGg
NR2E3	17	0	9.65	4.511	0.0485	[1]Tcc>Ccc
NR2E3	36	0	112.949	5.441	0.03	[1]Ccc>Gcc.Ccc>Tcc
NR2E3	46	0.002	510.694	5.601	0.0277	[1]aGc>aCc.Agc>Ggc
NR2E3	125	0	21.974	6.485	0.0176	[1]aTg>aGg.cAg>cGg.Ctg>Atg.cTg>cAg
NTNG2	370	0	9.364	6.636	0.0163	[2]Act>Cct
NTNG2	430	0	8.633	6.589	0.0167	[2]Cct>Tct
NTNG2	618	1.253	5609.66	6.566	0.0169	[1]ccG>ccA.cCg>cTg.CcG>TcC
NTNG2	619	0	99.949	5.13	0.0353	[1]Cgc>Ggc.Cgc>Tgc
PNPLA7	364	0	22.776	9.826	0.0032	[2]Ggc>Agc
PNPLA7	524	0	443.412	7.436	0.0108	[2]Gtc>Atc
PNPLA7	601	0	11.722	4.697	0.0441	[1]Gtg>Atg.Gtg>Ctg
PNPLA7	1181	0	44.108	6.301	0.0193	[1]cGg>cAg
ANKRD26	91	2.631	718.722	6.405	0.0183	[1]gCa>gAa.gcA>gcG.Gca>Tca.gcG>gcA.TCA>GG...
ANKRD26	106	0	68.793	6.425	0.0181	[1]cGT>cAG.Tgt>Cgt
ANKRD26	127	0	25.197	4.776	0.0423	[3]gCT>gNN
ANKRD26	159	2.252	10000.000...	9.671	0.0035	[1]AcA>GcG.gcA>gcG.gCA>gTG.GTG>ACA
ANKRD26	175	1.46	1413.31	8.294	0.007	[2]Atg>Ntg
ANKRD26	245	0	14.713	5.58	0.028	[1]aTt>aAt.Ctt>Gtt.Ctt>Ttt.Gtt>Att.TtT>At...
ANKRD26	268	0	18.911	6.067	0.0218	[1]aaT>aaA.aAt>aTt.AAt>CCt
ANKRD26	270	2.086	52.436	5.138	0.0351	[1]CAg>TGg.cTg>cAg.cTG>cCA.Ctg>Ttg.CtG>Tt...
ANKRD26	271	0	1306.36	10.714	0.002	[1]AaA>CaT
ANKRD26	274	0	10.462	5.079	0.0362	[1]ttA>ttC
ANKRD26	277	0	8.1	5.092	0.0359	[1]cTa>cCa.cTa>cGa
ANKRD26	284	0	5.593	4.51	0.0486	[2]Tcc>Ccc
ANKRD26	310	0	82.447	8.235	0.0072	[1]AGt>CAt.Agt>Ggt.Ggt>Agt
ANKRD26	317	0	80.173	9.179	0.0045	[1]gAa>gGa.GGa>ACa
ANKRD26	324	0.815	51.38	6.67	0.016	[2]Gtc>Atc
ANKRD26	341	0	1040.38	17.01	0.0001	[2]cCa>cTa
ANKRD26	399	0	583.663	5.829	0.0246	[1]Atg>Ctg.ATG>GAC
ANKRD26	424	5.894	1674.94	7.445	0.0108	[2]AGT>CAA
ANKRD26	427	1.639	606.165	5.425	0.0303	[2]cGg>cAg.Cgg>Tgg
ANKRD26	432	0	536.78	15.777	0.0002	[1]CAt>ATt.cAt>cTt
ANKRD26	433	0	15.157	5.667	0.0267	[2]ttA>ttT
ANKRD26	440	0	242.083	8.97	0.005	[2]aGa>aAa.GGa>ACa
ANKRD26	494	2.708	251.038	7.251	0.0119	[3]ccT>ccC
ANKRD26	503	0.945	47.247	5.935	0.0233	[1]ccT>ccC.cCt>cTt.CCt>TTt
ANKRD26	607	0	8.506	4.472	0.0495	[5]Gta>Ata
ANKRD26	656	1.047	30.352	4.746	0.043	[1]GCa>ATa.gcA>gcG
ANKRD26	849	0	50.902	7.326	0.0114	[1]AaT>GaA
ANKRD26	850	1.111	180.039	11.025	0.0017	[1]GaC>AaT.GAC>ATG
ANKRD26	852	1.144	209.915	4.716	0.0437	[1]CAG>AGA.cAg>cGg.cAG>cTC.Cag>Gag
ANKRD26	853	0	1050.57	5.509	0.029	[2]aGg>aAg
ANKRD26	854	2.742	98.461	6.317	0.0192	[2]CAG>AGC
ANKRD26	855	1.761	843.678	8.314	0.0069	[1]CTT>AGC.ctT>ctA.ctT>ctC.Ctt>Ttt
ANKRD26	857	0	950.629	10.299	0.0025	[2]cGa>cAa
ANKRD26	859	0.729	153.822	12.334	0.0009	[1]caG>caA.cAg>cGg.CGG>AAT.cGg>cAg.Cgg>Tg...
ANKRD26	860	0	952.615	11.349	0.0015	[1]aAt>aGt.AAT>GGA
ANKRD26	863	0	34.904	8.563	0.0061	[1]AGa>GAa
ANKRD26	864	4.224	867.068	6.186	0.0205	[2]atC>atA.atC>atT
ANKRD26	865	0.629	738.328	9.435	0.0039	[1]tTA>tAT.ttA>ttG
ANKRD26	913	0.548	12.719	6.255	0.0198	[2]Gcc>Acc
ANKRD26	1257	1.506	451.091	7.242	0.0119	[1]aTC>aCT.atC>atA.Atc>Ctc.CTC>TCA
ANKRD26	1258	0.996	95.37	6.881	0.0144	[1]aCa>aGa.ACa>CAa.Aca>Cca.AcA>GcG
ANKRD26	1259	1.89	1236.13	4.59	0.0466	[1]aGT>aAC.aGt>aCt.AGT>GTC
ANKRD26	1260	1.221	113.002	8.935	0.005	[1]caA>caG.cAa>cCa.CAG>AGT
ANKRD26	1263	0	10000.000...	6.953	0.0138	[1]GaA>AaG
ANKRD26	1264	2.824	2909.58	11.166	0.0016	[2]Gca>Aca
ANKRD26	1567	0	1150.65	15.336	0.0002	[1]Act>Gct.ACT>TGC
ANKRD26	1639	0	33.213	9.035	0.0048	[1]tAC>tGG
ANKRD26	1642	0	124.018	10.44	0.0024	[1]aAG>aTC
ANKRD26	1671	0	1874.89	10.153	0.0027	[1]cTC>cAA.CTC>TCT
OLAH	54	0.685	171.59	4.609	0.0461	[1]ccC>ccT.Ccc>Gcc
OLAH	56	0	47.421	11.676	0.0013	[2]Gca>Tca
OLAH	69	0	14.618	4.619	0.0459	[1]aaG>aaT.aAg>aTg.Aag>Gag.Aat>Gat
OLAH	70	0	210.741	6.593	0.0166	[1]Att>Ttt.Ttt>Ctt
OLAH	85	0	187.407	5.989	0.0227	[1]Gaa>Aaa
OLAH	169	0	14.459	5.308	0.0322	[1]Gag>Aag.gaG>gaC.gaG>gaT
OLAH	185	6.351	10000.000...	4.626	0.0457	[2]gAC>gCT.gaT>gaC
OLAH	272	0	15.904	5.708	0.0262	[1]cTt>cCt
OLAH	276	0	30.348	11.446	0.0014	[1]caC>caA.cAc>cGc
OLAH	286	0	593.662	8.387	0.0067	[1]aCc>aAc.aGc>aCc.aGc>aTc.AGc>GAc
SLC52A3	281	0	141.231	4.723	0.0435	[3]Ggc>Agc
PLEKHA7	10	0	141.21	5.457	0.0298	[1]gAC>gGG
PLEKHA7	11	0	657.832	14.707	0.0003	[1]aCT>aAA.Act>Gct
PLEKHA7	12	0	69.229	14.553	0.0003	[1]TtA>CtT
PLEKHA7	13	0	39.371	7.686	0.0095	[1]Cct>Act
PLEKHA7	53	0	134.834	10.267	0.0026	[1]ATc>TCc
PLEKHA7	54	0	3651.69	19.311	0	[1]CGC>GCT
PLEKHA7	55	0	193.326	16.701	0.0001	[1]TCa>CAa
PLEKHA7	526	0	410.69	6.806	0.0149	[1]cGc>cTc
PLEKHA7	541	0	124.651	5.677	0.0266	[1]Ggc>Agc
PLEKHA7	624	0	33.141	9.756	0.0033	[2]Gtg>Atg
PLEKHA7	913	0	330.154	6.462	0.0178	[1]Gtg>Atg.Gtg>Ctg
RAG1	34	0	65.266	6.067	0.0218	[1]Gcc>Acc
RAG1	87	1.648	31.932	5.175	0.0345	[1]gaC>gaA.gaC>gaT.gAc>gGc
RAG1	341	0	18.439	6.072	0.0217	[1]Ctc>Atc
SUCO	67	5.046	83.116	5.36	0.0313	[2]gcC>gcT.gCt>gTt
SUCO	127	0	19.87	5.469	0.0296	[2]gGc>gAc
SUCO	238	0	442.141	6.962	0.0138	[1]Gct>Act.Gct>Tct
SUCO	438	0	27.433	4.828	0.0412	[3]Gta>Ata
SUCO	595	0	276.137	5.228	0.0335	[1]Agt>Ggt.Ggt>Tgt
SUCO	658	0.926	479.267	6.221	0.0201	[1]ctG>ctA.Ctg>Gtg.Gtg>Atg.Gtg>Ctg.gTg>gA...
SUCO	828	0	621.14	5.311	0.0321	[1]Ata>Gta
SUCO	1119	0	29.109	5.04	0.0369	[1]Act>Gct
PPP1R12B	18	0.912	338.955	12.401	0.0009	[1]GCg>CGg.gcG>gcA
PPP1R12B	21	0	2696.19	15.434	0.0002	[1]GcC>CcG
PPP1R12B	22	0	192.696	6.573	0.0168	[1]GAG>AGC
PPP1R12B	23	0	1964.98	7.767	0.0091	[1]CAG>AGC
PPP1R12B	193	0	123.63	5.245	0.0332	[1]cAg>cGg.Cag>Gag
PPP1R12B	555	0	14.085	4.687	0.0443	[1]cAg>cGg.Cgg>Tgg
PPP1R12B	561	0	15.262	6.314	0.0192	[1]Acc>Tcc
PPP1R12B	750	0.857	22.183	6.513	0.0173	[2]taT>taC
PPP1R12B	801	0	284.593	8.797	0.0054	[2]Act>Gct
LOC101907648	11	0	38.418	6.276	0.0196	[2]Gac>Aac
LOC101907648	12	1.826	131.553	9.735	0.0034	[1]tGt>tAt.tGt>tCt.tgT>tgC
LOC101907648	22	1.033	55.172	5.177	0.0344	[1]cTc>cAc.cTc>cGc.ctC>ctT
ETFA	178	0	105.337	12.973	0.0007	[2]Gca>Aca
ETFA	274	0.02	10000.000...	9.419	0.0039	[1]GAA>NNT
ETFA	296	0	48.039	6.496	0.0175	[1]aCa>aTa
LIPM	76	1.051	32.392	6.853	0.0146	[2]Gtt>Att
LIPM	147	0.001	22.468	4.778	0.0423	[1]ACa>GTa.aTa>aCa
LIPM	264	0	36.92	5.065	0.0365	[2]Gtg>Atg
LIPM	273	0	14.12	5.017	0.0374	[2]Atc>Gtc
LIPM	417	0	109.718	5.391	0.0308	[2]cAg>cGg.cGg>cAg
SHC1	123	0	133.774	6.849	0.0146	[1]Act>Gct
SHC1	124	0	297.628	6.44	0.018	[1]Cgg>Ggg
SHC1	381	0	65.378	13.87	0.0004	[1]aCt>aTt.Act>Cct
CARNS1	960	0	31.279	13.504	0.0005	[2]Gtt>Att
CCDC17	109	1.622	80.434	7.502	0.0105	[2]cGt>cCt
CCDC17	250	0	323.986	6.597	0.0166	[3]cGg>cAg
CCDC17	280	0	27.586	4.887	0.04	[1]caG>caC.caG>caT.cAg>cCg.cAg>cGg
CCDC17	285	0	28.675	5.439	0.0301	[2]cAg>cGg
CCDC17	448	0	181.095	6.121	0.0212	[1]aCc>aTc.Acc>Tcc
CCDC17	497	0	52.457	9.967	0.003	[1]caG>caC.caG>caT
CCDC17	557	0	371.072	6.379	0.0186	[2]agT>agG
CCDC17	611	0	18.84	4.687	0.0443	[1]Gag>Aag
MAP7D1	84	1.379	60.837	4.739	0.0431	[2]cCc>cTc.Ccc>Tcc
MAP7D1	130	0	83.05	8.197	0.0073	[1]Ccc>Tcc
MAP7D1	146	0	72.642	6.296	0.0194	[1]aAg>aTg
MAP7D1	150	0	215.071	17.533	0.0001	[1]Gaa>Caa.gAa>gGa
MAP7D1	154	0	617.574	7.842	0.0088	[1]AAg>NCg
MAP7D1	630	1.358	10000.000...	13.93	0.0004	[1]cgC>cgG.CgC>GgG
DYNC1H1	110	0	298.502	7.443	0.0108	[1]ggA>ggT
DYNC1H1	877	0	139.13	4.474	0.0495	[1]atC>atA
DYNC1H1	2210	0	3507.2	16.028	0.0001	[1]cTC>cCG
DYNC1H1	2211	0	181.873	21.044	0	[1]tAT>tGG
DYNC1H1	2212	0	1805.13	5.66	0.0268	[1]CaG>AaA
DYNC1H1	2213	1.228	700.001	13.228	0.0006	[1]aTc>aAc.atC>atT.Atc>Ctc
DYNC1H1	2632	0.434	197.708	8.898	0.0051	[1]ctG>ctC.Ctg>Gtg
DYNC1H1	2633	0	126.2	8.133	0.0076	[1]aAg>aTg
DYNC1H1	3650	0	931.68	9.447	0.0039	[1]aAc>aCc
RIPOR1	695	0.758	135.756	7.322	0.0115	[2]Act>Gct
RIPOR1	749	0	440.469	8.57	0.0061	[1]Cac>Tac
RIPOR1	794	0.075	10000.000...	21.451	0	[1]AAG>CCA.aGC>aAG.AGC>GCA.Agc>Ggc
RIPOR1	854	0	391.143	16.378	0.0001	[2]aTa>aAa.aTa>aCa
RIPOR1	1067	1.278	1847.36	7.981	0.0082	[1]ccC>ccT.Ccc>Gcc
ALS2CL	94	0	101.06	7.98	0.0082	[2]cAg>cGg.cGg>cAg
ALS2CL	554	0.784	749.392	16.436	0.0001	[1]aCc>aAc.acC>acT.aCt>aGt
C3H1orf216	122	0	47.516	10.215	0.0026	[1]Gac>Aac.gAc>gGc
C3H1orf216	142	0	24.171	7.431	0.0109	[1]cTt>cCt
BAIAP2L2	120	0	14.971	4.873	0.0403	[1]Cgc>Ggc
BAIAP2L2	221	0	101.729	5.319	0.032	[1]tCg>tTg
BAIAP2L2	508	0	100.477	7.9	0.0085	[2]cCa>cTa
BAIAP2L2	526	0	12.47	4.555	0.0474	[1]Acc>Gcc.ACc>GTc
BAIAP2L2	561	0	36.936	9.093	0.0047	[5]Cgg>Ggg
BAIAP2L2	567	0	1680.62	19.802	0	[1]cCc>cAc.cCc>cTc.CCC>GGG
BAIAP2L2	568	1.892	2547.41	9.974	0.003	[2]caA>caG
BAIAP2L2	635	0	13.403	4.586	0.0467	[1]Gcc>Acc.gCc>gTc
BAIAP2L2	644	0	180.237	4.711	0.0438	[3]cAc>cGc
BAIAP2L2	650	0	10000.000...	18.978	0	[1]aCT>aAA.aCt>aTt
SLC35D2	3	0	23.402	10.773	0.002	[1]Acg>Ccg.ACG>GAC
SLC35D2	11	0	11.873	7.859	0.0087	[2]Gcg>Tcg
SLC35D2	26	0	27.771	9.845	0.0032	[2]Gtg>Ctg
SLC35D2	28	0	10.392	4.792	0.042	[1]aAG>aGC.aAg>aGg.Aag>Cag
SLC35D2	30	0	50.547	13.16	0.0006	[1]CTG>TGT
SLC35D2	35	2.172	47.741	5.403	0.0306	[1]TAC>ACG.taC>taT
SLC35D2	38	0	240.017	4.865	0.0404	[1]TGC>GCT
SLC35D2	262	0.992	10000.000...	4.554	0.0475	[1]Aga>Gga.ggA>ggG.gGA>gTG
SLC35D2	349	0	48.65	8.25	0.0072	[2]Aga>Gga
ZNF462	59	0	17.975	5.518	0.0289	[2]Gtg>Atg
ZNF462	324	0	15.644	5.23	0.0335	[1]Ggc>Agc
ZNF462	543	0	31.577	5.312	0.0321	[1]cAg>cCg
ZNF462	558	0	2540.06	12.365	0.0009	[1]CAG>AGC
ZNF462	563	0	22.739	5.684	0.0265	[2]cGc>cAc
ZNF462	569	0.001	1581.47	17.965	0.0001	[1]aTc>aGc.ATc>CAc
ZNF462	703	0	20.756	5.98	0.0228	[2]aAa>aGa
ZNF462	764	0	786.342	6.561	0.0169	[1]gaG>gaC
ZNF462	1648	0	44.792	13.233	0.0006	[2]Gct>Act
LOC112441525	68	0.977	30.356	6.495	0.0175	[2]aCg>aTg.aGg>aAg.aGg>aCg
LOC112441525	185	0	21.239	6.3	0.0193	[1]Gtt>Att.Gtt>Ctt.gTt>gCt.Gtt>Ttt
FUCA2	28	4.338	8979.12	14.231	0.0003	[2]gcT>gcC
FUCA2	48	0.863	559.952	5.469	0.0296	[2]gCc>gGc
FUCA2	174	0	54.016	11.12	0.0017	[1]gAc>gCc.gAc>gGc
SLC22A1	52	0	12.795	5.081	0.0362	[2]Cgg>Tgg
SLC22A1	95	0	252.623	6.686	0.0159	[3]Gcc>Acc
SLC22A1	356	0	11.37	4.573	0.047	[2]Ctc>Atc
SLC22A1	493	0	9.717	5.581	0.028	[1]Act>Gct.aTt>aCt.atT>atG.Att>Gtt
TMEM255B	3	0	56.124	4.847	0.0408	[1]caG>caC.cAG>cGC
TMEM255B	6	0	358.765	8.881	0.0052	[1]cCg>cAg.cCG>cGT
TMEM255B	247	0	19.907	5.097	0.0359	[2]Gcc>Acc
TMEM255B	284	3.364	10000.000...	10.296	0.0025	[1]cGC>cAT.cGC>cCG.cgC>cgG.Cgc>Tgc.Cgg>Ag...
TMEM255B	316	0.921	21.132	8.509	0.0063	[1]GAg>AGg.ggA>ggT.gGg>gAg.ggG>ggA
TMEM255B	318	1.023	10000.000...	10.645	0.0021	[2]cAg>cGg.cGg>cAg
FCHSD2	730	3.644	202.452	9.543	0.0037	[2]gcA>gcG
TCN1	58	0	25.024	6.636	0.0163	[2]Atc>Gtc
TCN1	172	0	39.03	7.951	0.0083	[3]aCt>aAt
TCN1	203	1.032	247.786	9.473	0.0038	[1]aCa>aAa.acA>acT.aCa>aTa.aTa>aCa.aTA>aC...
TCN1	204	5.971	10000.000...	6.203	0.0203	[2]caA>caG
TCN1	327	3.897	53.583	5.005	0.0376	[2]Atc>Gtc
TCN1	413	0	25.593	5.888	0.0239	[3]gCt>gTt
TCN1	420	0	25.133	6.318	0.0192	[1]Gat>Aat.gAt>gGt
MMP17	10	1.313	1088.54	4.496	0.0489	[1]ccC>ccT.cCT>cTG
MMP17	12	4.755	10000.000...	6.739	0.0154	[3]ccG>ccA
MMP17	13	0	4868.66	14.826	0.0003	[1]cCG>cGC
MMP17	16	0.961	83.235	9.943	0.003	[1]cGg>cCg.cgG>cgT.cGg>cTg.Cgg>Tgg
MMP17	233	0	45.239	9.205	0.0044	[2]Gcc>Acc
MMP17	324	0	16.203	5.212	0.0338	[1]cCg>cTg.Ccg>Tcg.tCg>tTg
DNAH10	128	0	16.092	5.212	0.0338	[2]agT>agG
DNAH10	1337	1.544	2867.52	7.142	0.0126	[1]Gta>Ata.GtA>CtC.gtA>gtG.Gtg>Atg
DNAH10	1371	0	19.691	5.226	0.0336	[1]Tac>Cac
DNAH10	1879	0	14.411	4.714	0.0437	[1]Agc>Ggc
DNAH10	1905	0	19.348	5.688	0.0265	[2]Atc>Gtc
DNAH10	2236	0.626	725.071	6.803	0.0149	[1]gGA>gCG.ggA>ggG
DNAH10	2724	0	22.571	7.604	0.0099	[1]tTa>tCa
DNAH10	2784	1.842	31.272	4.561	0.0473	[1]aAc>aGc.Aac>Cac.aaT>aaC.aAt>aGt
DNAH10	2787	0	27.695	6.905	0.0142	[1]Gtc>Atc.Gtc>Ctc
DNAH10	3035	0	16.135	5.461	0.0297	[2]Gtg>Atg
DNAH10	3492	0	28.113	5.365	0.0312	[1]Gag>Cag
LOC107131422	109	0	14.997	4.503	0.0487	[1]Aag>Gag.aGg>aAg.Agg>Ggg
LOC107131422	329	0	48.801	10.592	0.0022	[1]aAg>aCg.Aag>Cag.Aag>Gag
LOC107131422	360	0	20.021	5.525	0.0288	[1]Gga>Aga.gGa>gAa
LOC107131422	382	0	16.174	5.745	0.0257	[1]Gcc>Acc.gTc>gCc
LOC107131422	394	0	30.205	6.582	0.0167	[2]Caa>Aaa.cTa>cAa
LOC107131422	512	0	15.699	5.633	0.0272	[2]cTg>cCg
LOC107131422	534	5.246	598.007	8.365	0.0067	[2]TCC>AGT
LOC107131422	535	0	2215.42	13.489	0.0005	[4]CaT>GaG
LOC107131422	626	0	620.915	7.11	0.0128	[4]Gta>Nta
LOC107131422	868	0	370.446	6.721	0.0156	[3]Aaa>Gaa
LOC107131422	870	0	548.088	5.4	0.0307	[4]aTa>aGa
LOC107131422	873	0	15.616	4.56	0.0473	[2]atT>atG
LOC107131422	894	4.112	10000.000...	17.788	0.0001	[1]aaG>aaA.Aag>Cag.AGA>TTG.aGg>aAg.agG>ag...
LOC107131422	920	0	13.272	4.923	0.0392	[2]Ggt>Agt
LOC107131422	967	0	22.637	5.381	0.031	[2]Gaa>Aaa
LOC107131422	994	0	17.43	4.88	0.0401	[1]aAg>aGg.aAg>aTg
LOC107131422	1021	0	22.431	5.348	0.0315	[1]aAg>aGg.Aag>Gag
LOC107131422	1208	0	22.137	5.816	0.0248	[1]Gta>Cta.gTa>gCa
LOC107131422	1287	0	67.341	5.469	0.0296	[1]Gct>Act.gCt>gTt.Gct>Tct
LOC107131422	1310	0	31.817	6.006	0.0225	[1]Gag>Aag
LOC107131422	1358	9.42	10000.000...	10.412	0.0024	[2]Ggc>Agc.gGC>gAG
LOC107131422	1464	0	1191.45	21.118	0	[1]cTg>cCg.CTg>GAg.Ctg>Gtg
LOC107131422	1465	0.001	2336.72	12.005	0.0011	[1]AGT>GAG.Agt>Ggt.gGT>gAG
LOC107131422	1495	0	21.923	5.289	0.0325	[1]gAg>gGg
LOC107131422	1520	0	22.02	4.708	0.0438	[1]CTg>TGg.Tgg>Cgg
LOC107131422	1540	0	15.865	5.34	0.0317	[1]gTt>gCt
LOC107131422	1601	0	21.919	6.004	0.0225	[2]ctG>ctN
LOC107131422	1618	0	14.689	5.127	0.0353	[1]Gca>Aca
LOC107131422	1632	0	14.196	5.436	0.0301	[1]Ctc>Ttc
LOC107131422	1649	0	57.048	5.727	0.0259	[1]cAg>cCg
LOC107131422	1675	0	172.977	6.361	0.0187	[3]Ccc>Acc
LOC107131422	1694	0	454.342	6.706	0.0157	[1]aCt>aTt.Act>Cct
LOC107131422	1710	0	65.233	4.95	0.0387	[1]GCc>TAc.Gcc>Tcc.TAc>GCc
LOC107131422	1790	0	21.26	5.714	0.0261	[2]Tca>Gca
LOC107131422	1941	0	30.771	7.086	0.0129	[2]Cgg>Tgg
LOC107131422	1944	1.73	53.774	6.267	0.0197	[1]caG>caA.CAg>TGg
LOC107131422	2071	0	24.878	5.665	0.0268	[1]aAg>aGg
LOC107131422	2150	0	29.651	7.73	0.0093	[2]aAt>aGt
LOC523461	6	0	44.026	5.859	0.0242	[1]Gct>Act.gCt>gTt.gTt>gAt
LOC523461	86	0	7.656	4.608	0.0462	[1]Tgt>Cgt
LOC523461	87	0	13.556	6.371	0.0186	[2]Cca>Gca
LOC523461	105	0	7.601	5.087	0.0361	[2]cGt>cAt
LOC523461	231	0	336.884	7.863	0.0087	[1]Gtc>Ctc.gTc>gCc
LOC523461	232	0	464.888	8.4	0.0066	[2]cCt>cAt
LOC523461	997	0	9.966	5.216	0.0337	[3]Tcc>Acc
LOC523461	1000	1.442	54.474	4.802	0.0418	[2]Aac>Gac
LOC523461	1002	0	85.887	6.253	0.0198	[1]CAa>NTa
LOC523461	1003	0.855	1037.61	10.061	0.0029	[1]gaA>gaG.GAG>AGA
LOC523461	1004	0.736	2945.87	12.855	0.0007	[1]CTC>ACT.ctC>ctT
LOC523461	1005	1.09	829.067	8.421	0.0066	[2]Cta>Tta
LOC523461	1008	0	7.859	4.727	0.0434	[1]Aaa>Gaa
LOC523461	1009	1.296	121.491	10.318	0.0025	[1]GAC>AGA.gaC>gaT
LOC523461	1015	0	17.972	11.117	0.0017	[2]Act>Gct
LOC523461	1026	0	8.846	5.582	0.0279	[1]cTt>cCt.Ctt>Gtt
OGG1	172	0	24.55	6.147	0.0209	[1]Cgg>Tgg
OGG1	174	0	132.229	5.069	0.0364	[3]Atc>Ctc
OGG1	290	0	26.71	4.739	0.0431	[1]cAg>cGg
OGG1	303	4.877	9742.83	8.573	0.0061	[2]ggC>ggA
OGG1	328	1.024	44.234	8.288	0.007	[1]caA>caC.caA>caG.cAa>cGa
MCM2	3	0	556.993	11.303	0.0015	[1]gCG>gGC
MCM2	389	3.791	2514.72	7.65	0.0097	[3]gcC>gcT
FCRLA	222	1.164	38.688	5.417	0.0304	[1]Acc>Gcc.Gcc>Acc.GcC>AcT.gCc>gTc.Gcc>Tc...
FCRLA	292	0	13.373	5.266	0.0329	[1]aaT>aaG.aAt>aCt.aCt>aAt
FCRLA	328	0	61.918	18.901	0	[1]cCt>cTt.CCt>TGt
FCRL6	39	0	90.892	6.964	0.0138	[3]cGa>cAa
FCRL6	167	0	13.906	4.782	0.0422	[2]cGc>cAc
FCRL6	278	0	56.542	4.893	0.0398	[1]gAg>gGg.Ggg>Agg
FCRL6	284	0	98.67	5.196	0.0341	[1]gAg>gTg
FCRL6	305	0	10000.000...	18.646	0	[1]aCC>aGG.aGc>aCc.agC>agA.agC>agG.aGc>aT...
CFAP43	622	0	64.893	10.366	0.0024	[2]gaA>gaT
CFAP43	716	0.983	47.155	5.944	0.0232	[4]cGg>cAg
CFAP43	734	0	64.08	5.525	0.0288	[2]aCt>aTt
CFAP43	745	0	539.33	5.674	0.0266	[1]Gat>Aat.gaT>gaG
CFAP43	929	0	24.016	5.38	0.031	[1]aGa>aAa
CFAP43	942	0	23.691	4.986	0.038	[1]aAa>aGa
CFAP43	1392	0	28.351	5.343	0.0316	[1]aAa>aGa.Aaa>Gaa
CFAP43	1408	0.935	1183.14	10.383	0.0024	[1]CGg>AAg.Cgg>Agg.cGg>cAg
CFAP43	1590	0	23.287	4.931	0.0391	[2]Gta>Ata
ENO4	15	1.386	55.643	8.142	0.0076	[1]aGg>aAg.agG>agA.aGg>aTg
ENO4	116	0	27.328	6.377	0.0186	[2]Gct>Act
ENO4	129	0	251.592	7.549	0.0102	[3]tCg>tTg
ENO4	599	0	460.137	6.859	0.0145	[1]Gag>Aag.gAg>gGg.Ggg>Agg
ARHGAP32	7	0	20.114	6.81	0.0149	[1]Gta>Ata
ARHGAP32	844	0	16.973	5.942	0.0232	[1]aGt>aAt
ARHGAP32	854	0.678	343.916	4.992	0.0379	[1]gGc>gCc.ggT>ggC
ARHGAP32	1083	0	22.523	6.466	0.0178	[2]Aca>Gca
ARHGAP32	1171	0	24.604	7.125	0.0127	[1]Tct>Cct.Tct>Gct.tCt>tGt
ARHGAP32	1249	0	47.518	14.158	0.0004	[1]tCt>tAt.tCt>tGt
ARHGAP32	1262	0	21.698	6.649	0.0162	[2]Tcc>Ccc
ARHGAP32	1346	0.852	295.851	4.649	0.0452	[1]ccC>ccG.Ccc>Gcc.Ccc>Tcc.Ccg>Gcg
ARHGAP32	1851	0	25.993	5.507	0.029	[1]caC>caG.cAg>cCg
ARHGAP32	2049	0	24.409	6.878	0.0144	[2]gGc>gCc
PNMA6E	94	0	720.717	6.877	0.0144	[2]Gat>Nat
PNMA6E	132	0.658	19.864	6.724	0.0156	[2]gGt>gAt
PNMA6E	179	0	5922.51	8.943	0.005	[1]AcA>GcG.Gca>Aca.GCa>NNa.Gca>Tca.GCg>CA...
PNMA6E	306	0	3784.23	4.764	0.0426	[3]GGt>NNt
PNMA6E	383	2.712	10000.000...	7.524	0.0103	[4]ggA>ggG
PNMA6E	384	4.012	10000.000...	9.062	0.0047	[3]gcT>gcC
PNMA6E	406	0	224.266	8.938	0.005	[2]Tgt>Agt
PNMA6E	423	0	10.663	6.024	0.0223	[1]Gca>Aca.gCa>gGa.Gca>Tca
PNMA6E	428	1.289	21.801	5.716	0.0261	[2]gcT>gcC.gCt>gGt
PNMA6E	429	0	9.504	5.575	0.028	[2]Gca>Tca
PNMA6E	521	3	1422.29	9.723	0.0034	[1]aGC>aNN.atC>atT.GCA>AGC.GtG>AtC.gTG>gC...
CCDC191	238	0	285.246	7.064	0.0131	[1]Aaa>Gaa
CCDC191	276	0	169.25	6.311	0.0192	[1]gAg>gGg
CCDC191	405	0	29.701	5.576	0.028	[2]cAc>cGc
CCDC191	415	0	203.037	6.378	0.0186	[2]cGt>cAt
CCDC191	605	0	30.544	5.564	0.0282	[1]AAc>CGc.Cgc>Tgc
CCDC191	827	0	143.906	15.299	0.0002	[2]Gta>Tta
AP4B1	257	0	68.838	13.215	0.0006	[2]Acc>Gcc
AP4B1	369	0	34.189	6.423	0.0182	[1]Atc>Gtc
AP4B1	446	0	36.057	6.859	0.0145	[1]Gtc>Atc
AP4B1	532	0	647.726	9.174	0.0045	[1]cAg>cGg.cGg>cAg.Cgg>Tgg
AP4B1	584	0	31.889	6.685	0.0159	[2]cGt>cAt
MEGF6	112	0.93	109.522	6.385	0.0185	[1]gcC>gcT.gCc>gTc
MEGF6	157	0	91.124	9.522	0.0037	[1]cGg>cAg.cGg>cTg.cTg>cCg
MEGF6	169	1.051	66.559	5.43	0.0302	[3]Gtc>Atc
MEGF6	237	0	70.142	6.698	0.0158	[1]Cag>Gag
MEGF6	600	0	105.367	10.639	0.0021	[1]Ttg>Gtg.tTg>tGg
MEGF6	1013	1.031	211.122	14.931	0.0002	[1]cCa>cTa.ccG>ccA.ccG>ccT.cCt>cTt
MEGF6	1223	0	10000.000...	12.449	0.0009	[1]GGG>NNC
MEGF6	1264	0.907	70.548	5.459	0.0298	[3]Gtc>Atc
MEGF6	1315	2.02	119.109	5.397	0.0307	[2]gcC>gcT
MEGF6	1407	0.99	68.36	5.432	0.0302	[4]Gtc>Atc
MEGF6	1485	0.9	70.415	5.531	0.0287	[3]cGc>cAc
MEGF6	1641	1.02	77.518	5.596	0.0277	[2]Ggc>Agc
PRDM16	7	0	153.528	15.044	0.0002	[1]AGg>GAg
PRDM16	138	0	131.553	14.669	0.0003	[1]Ggc>Agc.gGc>gTc
PRDM16	675	1.18	83.071	5.461	0.0297	[1]ccC>ccT.Ccc>Gcc
PRDM16	783	1.4	66.77	5.012	0.0375	[4]cTg>cCg
PRDM16	791	1.417	80.294	5.061	0.0365	[2]Gcc>Acc
CDCP1	206	0	42.591	6.851	0.0146	[4]Gtc>Atc
CDCP1	771	1.192	7050.17	12.858	0.0007	[1]gGC>gCG.ggG>ggC
CDCP1	773	0	4737.08	12.549	0.0008	[1]Tgc>Cgc.TGC>CTG.tGc>tTc
CDCP1	778	0	135.153	14.976	0.0002	[1]cCc>cAc.Ccc>Tcc
CDCP1	780	0.635	419.697	14.753	0.0003	[1]ACc>CAc.aTa>aCa.aTA>aCC.Ata>Gta
CDCP1	781	0	217.394	10.53	0.0022	[1]TGc>AAc.TGc>CTc.Tgc>Ggc
TMCC3	247	0	10.936	5.352	0.0314	[1]Gtg>Atg
PMEL	364	0	223.086	7.743	0.0093	[1]Cct>Tct
PMEL	420	1.152	606.991	5.186	0.0343	[1]acC>acT.Acc>Gcc
PMEL	436	2.41	62.883	7.269	0.0118	[1]Ggg>Agg.gGt>gAt.ggT>ggA.ggT>ggG
PMEL	528	0	220.347	6.801	0.015	[1]Tgt>Cgt
PMEL	554	0	1761.85	8.682	0.0057	[1]Ctc>Atc
PMEL	622	1.086	41.635	4.525	0.0482	[1]gGt>gAt.ggT>ggC.Ggt>Tgt
SMPDL3A	4	1.345	10000.000...	11.284	0.0015	[1]cgG>cgT.Cgg>Tgg.cTg>cCg.cTG>cGA.cTg>cG...
SMPDL3A	375	0	52.244	5.622	0.0274	[1]aCc>aTc.Acc>Gcc
SMPDL3A	378	0	50.693	4.577	0.0469	[2]Att>Gtt
SMPDL3A	394	1.228	29.421	6.118	0.0212	[1]Gca>Aca.gcA>gcG.gCa>gTa
DIP2A	3	0	24.451	6.654	0.0161	[1]gCc>gGc.gGc>gCc
DIP2A	5	1.923	1062.25	15.969	0.0001	[1]cgC>cgT.CGC>GCG.GCG>CGC
DIP2A	6	1.056	902.502	7.882	0.0086	[1]CgG>GgC.Ggg>Cgg.gGg>gAg.ggG>ggC
DIP2A	7	4.082	1047.26	5.961	0.023	[1]CTG>TGC.TGC>CTG.tgC>tgT
DIP2A	9	1.964	531.815	15.6	0.0002	[2]Ctg>Ttg
DIP2A	11	2.489	843.767	5.741	0.0258	[1]gcG>gcT.gCG>gGC.GgC>CgG
DIP2A	14	1.131	1232.06	15.712	0.0002	[1]CTG>GCC.CtG>TtA
DIP2A	15	3.445	880.866	5.32	0.032	[1]ccC>ccA.ccC>ccG.ccC>ccT.CcG>GcT
DIP2A	51	0.856	601.026	9.988	0.003	[2]gtA>gtG
DIP2A	52	1.749	1257.27	8.087	0.0078	[1]ccA>ccC.ccA>ccG.ccC>ccT.CcG>GcC
DIP2A	323	0	11.592	4.699	0.044	[1]aTg>aCg.Gtg>Atg.gTg>gAg.gTg>gCg.gTg>gG...
DIP2A	357	0	58.461	11.012	0.0018	[2]Gtc>Atc
DIP2A	373	0	16.936	7.292	0.0116	[1]Gct>Tct
DIP2A	1107	1.881	2459.47	16.508	0.0001	[3]aaA>aaG
DIP2A	1235	0	227.406	6.219	0.0202	[1]aAg>aGg.aGg>aAg
EML6	439	0	24.072	6.108	0.0213	[1]Gcc>Acc
EML6	607	0	59.621	11.357	0.0015	[1]Cca>Aca.Gca>Aca.Gca>Cca
EML6	861	0	82.431	6.964	0.0138	[1]gTt>gCt
EML6	1755	0	30.509	5.575	0.028	[3]Atc>Gtc
FUT7	37	0	9.946	4.663	0.0449	[1]Gcc>Acc.Gcc>Tcc
FUT7	99	0.337	23.723	5.589	0.0278	[1]cTg>cGg.ctG>ctA
FUT7	101	0	11.583	4.753	0.0428	[2]aCc>aGc
FUT7	102	0	97.503	4.853	0.0407	[2]cGg>cAg.Cgg>Ggg
FUT7	103	0	102.219	5.981	0.0228	[4]cGg>cAg
FUT7	174	2.961	7069.45	6.533	0.0172	[2]gcC>gcT
FUT7	220	0	10.25	5.015	0.0374	[2]Atg>Gtg
FUT7	320	0	19.823	9.275	0.0042	[2]Gcc>Acc
RASAL2	982	0.008	2090.28	18.158	0	[1]AGc>CAc
RASAL2	1103	0	25.079	4.991	0.0379	[1]Ttc>Ctc
RASAL2	1118	0	1128.87	4.594	0.0465	[1]aAA>aGG
RASAL2	1125	0	20.901	4.67	0.0447	[1]gAc>gGc
RASAL2	1137	0	540.326	6.013	0.0224	[1]Ata>Gta.gTa>gGa
CUX2	3	0	20.51	5.545	0.0285	[2]gCc>gTc
CUX2	4	0	20.172	5.632	0.0272	[2]Gcc>Acc
CUX2	5	0	13.987	6.14	0.021	[2]aAt>aGt
CUX2	8	0	15.634	4.999	0.0377	[2]tCg>tGg
CUX2	16	0	8.874	5.058	0.0366	[1]tTt>tCt
CUX2	18	0	23.51	8.316	0.0069	[2]cTa>cCa
CUX2	1261	0	58.506	4.885	0.04	[1]aAt>aGt.aGt>aAt.aGt>aCt
CUX2	1272	0	145.163	5.145	0.035	[1]tCc>tGc
CUX2	1292	0	17.423	7.922	0.0084	[2]Gtg>Atg
ADGRG7	226	0	18.386	5.12	0.0354	[3]Act>Gct
ADGRG7	237	0	19.259	4.967	0.0383	[1]Att>Gtt
ADGRG7	249	0	79.453	5.523	0.0288	[2]aAc>aCc
ADGRG7	250	5.089	596.558	8.673	0.0058	[1]Caa>Aaa.CAa>ACa.CAA>ACT.caA>caG.CaA>Ga...
ADGRG7	259	0	35.575	5.796	0.025	[1]Ata>Gta.AtA>GtG
ADGRG7	291	0.941	145.462	10.651	0.0021	[1]TCc>AAc.tcC>tcT
ADGRG7	448	1.541	44.815	6.41	0.0183	[2]aTt>aCt
ADGRG7	488	0	28.087	7.006	0.0135	[1]Gtg>Ttg
ADGRG7	530	0.897	45.697	8.551	0.0061	[3]gCg>gTg
ADGRG7	670	0	16.223	5.248	0.0332	[1]aAg>aGg
ADGRG7	786	0	3113.35	20.984	0	[3]aCg>aTg
WDR62	263	0	25.569	6.888	0.0143	[1]cAg>cGg.cGg>cAg
WDR62	911	0.706	403.254	5.509	0.029	[1]cTG>cAN.ctG>ctC
WDR62	983	0	20.482	8.259	0.0071	[2]Ggc>Agc
WDR62	1020	0	12.7	5.729	0.0259	[1]tTt>tGt
WDR62	1130	0	14.677	4.824	0.0413	[1]Gtc>Atc
WDR62	1136	1.174	291.553	15.471	0.0002	[2]gGg>gCg
WDR62	1215	0	22.202	5.953	0.0231	[3]cGc>cAc
WDR62	1352	0	15.021	4.934	0.039	[1]Gcc>Acc.gCc>gTc.Gtc>Atc
LYSMD4	55	0	41.265	5.916	0.0235	[1]gaG>gaT
LYSMD4	219	0	112.632	12.636	0.0008	[1]caG>caT.cAg>cGg
LYSMD4	273	0	44.268	6.771	0.0152	[1]gCc>gGc.Gcc>Tcc
PRIM2	65	0	12.043	5.046	0.0368	[2]Gtg>Atg
PRIM2	404	0	15.096	5.562	0.0282	[1]Atc>Gtc.gTc>gCc
PRIM2	476	3.297	56.642	6.028	0.0222	[2]ccG>ccA
TCERG1L	227	0.737	246.154	4.679	0.0445	[3]Gcc>Acc
TCERG1L	345	0.663	33.741	8.69	0.0057	[1]aGg>aAg.Agg>Cgg.cGg>cAg
COL4A5	20	0	78.924	6.525	0.0172	[1]cTt>cCt
COL4A5	740	0	74.468	6.503	0.0174	[2]Tct>Cct
COL4A5	895	0	68.699	5.911	0.0236	[2]Gcc>Acc
COL4A5	1065	0	69.632	5.428	0.0303	[1]gAa>gGa
COL4A5	1417	0	64.546	7.701	0.0095	[1]cGc>cAc
COL4A5	1477	0	1442.69	8.164	0.0075	[1]Aca>Gca
COL4A5	1572	2.631	526.764	5.078	0.0362	[1]gcA>gcG.gCg>gTg
COL4A5	1592	6.792	148.376	6.325	0.0191	[2]cGt>cAt.cgT>cgC
LDLRAD1	24	0	41.125	8.482	0.0064	[1]gGa>gCa
LDLRAD1	136	0	49.765	11.19	0.0016	[1]caG>caT.cAg>cGg.caT>caG
LDLRAD1	202	2.069	281.768	5.169	0.0346	[1]agC>agA.agC>agT.Agc>Cgc
LDLRAD1	205	2.461	58.448	7.157	0.0125	[2]cGg>cAg
BCL2L10	119	0	12.346	7.729	0.0093	[1]CCc>GTc
BCL2L10	128	0.914	182.507	8.195	0.0074	[2]Gtg>Atg
SVIL	553	0.615	53.804	5.929	0.0234	[1]Gga>Cga.ggA>ggC
SVIL	1113	2.091	63.905	4.463	0.0497	[1]Gta>Ata.GtA>AtG.gtA>gtG.Gta>Tta.GtA>Tt...
SVIL	1151	0	82.365	15.251	0.0002	[2]Gtg>Atg
POLG	21	0	10000.000...	17.626	0.0001	[1]cCA>cTG
POLG	104	0	125.129	8.964	0.005	[1]cCc>cTc
POLG	214	0	153.207	8.816	0.0054	[1]Gtg>Ttg
POLG	215	0	144.534	10.845	0.0019	[1]Gaa>Caa
POLG	248	0	117.234	6.909	0.0142	[1]Gag>Aag
POLG	430	1.843	299.441	12.442	0.0009	[1]Gcg>Acg.gcG>gcA.gCg>gTg
POLG	485	1.313	189.456	6.805	0.0149	[2]Ctg>Gtg
DPH7	161	0	15.116	4.635	0.0455	[1]gaG>gaT
DPH7	191	0	36.476	8.375	0.0067	[4]cAg>cGg
DPH7	270	0	119.257	6.745	0.0154	[1]gCc>gGc,Gcc>Tcc
DPH7	289	0.564	102.911	4.812	0.0415	[3]tCt>tGt
DPH7	300	0.521	170.872	4.978	0.0381	[1]Ggt>Cgt,ggT>ggG
DPH7	314	1.653	390.191	7.639	0.0098	[3]tTt>tGt
OLFM4	40	0	178.417	5.844	0.0244	[3]cAc>cGc
OLFM4	72	0	59.293	5.648	0.027	[2]tAc>tCc,tCc>tAc
OLFM4	74	1.623	27.122	5.848	0.0244	[2]Ccc>Tcc
OLFM4	106	0	12.152	4.817	0.0414	[1]tTt>tCt,tTt>tGt
OLFM4	111	2.527	29.452	4.781	0.0422	[2]gcA>gcC
OLFM4	320	0	18.185	6.261	0.0197	[3]Ctg>Gtg
OLFM4	332	0	11.648	5.074	0.0363	[3]aCt>aTt
OLFM4	357	0	169.874	6.797	0.015	[3]Tcc>Acc
CLSPN	161	0	168.839	5.703	0.0263	[2]aTt>aCt
CLSPN	464	0	43.154	9.809	0.0032	[2]aAa>aGa
C3H1orf216	488	0	46.373	5.205	0.0339	[1]cCt>cTt,cTt>cCt
PSMB2	591	0	94.178	5.84	0.0245	[3]Aca>Gca
TFAP2E	665	1.828	10000.000...	8.303	0.007	[1]gAA>gTG,gaG>gaA,gAg>gCg
NCDN	701	0	40.415	5.718	0.0261	[3]Aat>Nat
NCDN	821	0	10000.000...	23.49	0	[1]TCA>CAG
NCDN	822	4.237	477.498	9.08	0.0047	[1]gcC>gcT,GCc>TTc,gcT>gcA,gcT>gcC
NCDN	964	0	269.777	6.859	0.0145	[1]Cag>Gag
KLRJ1	47	0	20.935	5.789	0.0251	[2]Ata>Gta
rna16488	118	0.001	8.943	4.71	0.0438	[3]Cca>Aca
LOC100296778	119	1.056	15.118	4.517	0.0484	[2]cTt>cCt
LOC100296778	143	0	274.815	8.745	0.0056	[3]tTg>tCg
LOC101905403	157	0	35.48	11.625	0.0013	[5]Gac>Aac
LOC101905403	160	0	11.283	4.695	0.0441	[1]Ctt>Ttt
LOC101905403	162	0	16.293	5.724	0.026	[1]aaG>aaT
FHAD1	549	0	34.684	6.649	0.0162	[1]cTc>cAc,Ctc>Gtc
FHAD1	636	0	165.352	5.326	0.0319	[1]Gac>Aac,gAc>gCc
FHAD1	779	0	37.462	11.183	0.0016	[2]Cgc>Tgc
TMEM51	785	0	30.356	5.642	0.0271	[1]Gag>Aag
TMEM51	945	0	23.836	5.578	0.028	[1]aaA>aaC,aAa>aGa,AaA>GaC
KAZN	1081	0	22.275	5.807	0.0249	[1]Gtg>Atg
KAZN	1396	0	643.895	7.817	0.0089	[1]cAg>cTg
KAZN	1435	0	29.09	5.009	0.0375	[1]aAc>aGc,Aac>Cac
KAZN	1440	0	27.12	6.862	0.0145	[1]Tca>Gca
PHLPP1	248	0	109.849	15.442	0.0002	[12]Tcg>Ncg
LOC112444194	249	0.95	103.327	11.337	0.0015	[1]TCc>AGc,tcC>tcG
BCL2	250	0	113.36	9.047	0.0048	[1]GAg>TCg
BCL2	251	0	28.125	7.856	0.0087	[1]GAg>AGg
BCL2	285	0	10.575	4.919	0.0393	[3]gGc>gAc
BCL2	600	0	70.538	7.266	0.0118	[1]cTt>cCt
LOC104975814	611	0	22.432	10.578	0.0022	[1]aGt>aAt,aGt>aTt
LOC104975814	614	0	65.233	6.969	0.0137	[1]Ggt>Tgt
KDSR	1248	0	2375.94	7.45	0.0107	[1]AAG>NNT
KDSR	1284	0.835	2259.52	15.105	0.0002	[2]GCC>TGN
VPS4B	1297	4.509	509.05	4.487	0.0491	[1]Acc>Tcc,Gcc>Acc,gcC>gcA,gcC>gcG,gcC>gc...
VPS4B	1351	0	53.569	4.741	0.0431	[1]gAg>gGg
KLRG1	29	0	30.313	6.588	0.0167	[1]Gct>Cct,Gct>Nct
KLRG1	33	1.223	717.644	4.901	0.0397	[1]aGa>aCa,agA>agG
KLRG1	63	0	89.885	6.683	0.0159	[1]cAg>cGg,cGg>cAg,Cgg>Tgg
KLRG1	104	0	28.238	5.735	0.0258	[1]aAa>aGa,Aaa>Gaa
KLRG1	114	1.752	10000.000...	12.245	0.0009	[1]aaC>aaG,aaC>aaT,aAc>aGc,AaC>CaA,AaC>Ca...
TAL2	84	0	51.842	10.28	0.0026	[1]cAc>cGc,Cac>Tac
TAL2	103	0	23.752	5.608	0.0276	[2]cAc>cGc
TAL2	104	0	25.461	5.568	0.0281	[1]cAc>cGc,cGc>cAc,Cgc>Tgc
LAMA4	22	0	58.399	4.612	0.0461	[2]tgC>tgG
LAMA4	104	0	105.686	6.254	0.0198	[2]Cgg>Tgg
LAMA4	243	0	44.836	4.887	0.04	[5]aAt>aGt
LAMA4	314	0	308.738	5.871	0.0241	[2]gaA>gaC
LAMA4	430	0	93.994	5.137	0.0351	[1]gaG>gaT
LAMA4	452	0	20.492	5.16	0.0347	[3]Tat>Cat
LAMA4	536	0	14.673	4.608	0.0462	[1]aGg>aAg,agG>agC,Agg>Tgg
LAMA4	633	0	206.589	5.832	0.0246	[3]aAt>aGt
LAMA4	1013	0	483.831	7.837	0.0088	[1]Ttg>Gtg
LAMA4	1085	0	16.406	4.976	0.0382	[1]aCt>aTt,Act>Gct,Gct>Act
LAMA4	1792	0	1145.77	7.974	0.0082	[1]aCa>aTa
LAMA4	1819	0	17.058	5.265	0.0329	[1]Atc>Gtc
LAMA4	1820	1.668	45.177	6.279	0.0195	[2]aAc>aCc
GATA5	240	0	198.791	5.992	0.0226	[1]TCc>NGc
TTC12	15	0	314.171	7.159	0.0125	[1]Aaa>Caa
TTC12	119	0	444.406	7.249	0.0119	[1]Gtc>Atc,gTc>gCc,gTc>gGc
TTC12	476	0	71.347	5.492	0.0293	[2]Ggg>Agg
TTC12	533	0	13.499	4.646	0.0453	[1]cAg>cCg,cAg>cGg
GABRD	22	0	10.962	4.584	0.0467	[2]Acc>Gcc
CRB1	67	0	161.602	5.059	0.0366	[2]gAc>gGc
CRB1	311	0	119.593	13.788	0.0004	[1]TGt>GTt
CRB1	370	0	55.789	5.375	0.0311	[3]cAg>cGg
CRB1	376	0	156.509	5.602	0.0277	[2]Agc>Ggc
CRB1	485	0	10.866	5.515	0.0289	[1]Gtc>Atc
CRB1	494	0	13.064	9.014	0.0048	[2]Ggc>Agc
CRB1	574	0.607	41.345	8.398	0.0066	[1]gcG>gcA,GCg>TTg,gTg>gCg
CRB1	658	2.188	95.837	6.23	0.02	[1]Acg>Gcg,CcA>AcG,ccA>ccG,CcA>GcG,GCa>AT...
CRB1	779	0	6.883	5.481	0.0294	[1]aCt>aAt,aCt>aTt
CRB1	819	0	9.014	5.604	0.0276	[1]Ttt>Ctt
CRB1	844	0	7.077	5.547	0.0285	[1]Act>Gct
CRB1	882	0	395.878	6.905	0.0142	[1]gCc>gTc,Gtc>Atc,gTc>gCc
CRB1	944	0	13.223	4.972	0.0382	[6]cGg>cAg
CRB1	1094	0	8.022	4.654	0.0451	[2]cGg>cAg
CRB1	1166	0	8.099	5.063	0.0365	[3]Acc>Gcc
CRB1	1189	0	8.595	4.482	0.0493	[1]Atc>Gtc,Atc>Ttc
FAM192A	133	0	53.172	11.573	0.0013	[1]Gtg>Ctg,Gtg>Ttg
FAM192A	199	0	15.716	5.229	0.0335	[1]Tcc>Gcc
ZNF180	22	0	18.918	5.075	0.0363	[1]Ctt>Ttt
ZNF180	25	0	46.554	5.285	0.0326	[1]Gag>Aag,gAg>gGg
ZNF180	70	0	25.613	7.641	0.0097	[1]cTg>cCg
ZNF180	170	0	21.635	5.483	0.0294	[1]aAg>aGg
ZNF180	173	0	25.029	7.588	0.01	[1]Ctg>Atg
ZNF180	203	0	16.803	4.903	0.0396	[1]Tct>Cct,tCt>tGt
ZNF180	298	1.383	29.652	5.732	0.0259	[2]gAg>gGg
ASPDH	64	0	146	4.749	0.0429	[1]Agc>Cgc
ASPDH	109	0	22.808	6.386	0.0185	[2]Gcc>Ccc
ASPDH	114	1.851	40.281	6.73	0.0155	[2]Ccc>Acc,Ccc>Tcc
ASPDH	146	0	23.661	6.08	0.0216	[3]gtG>gtN
ASPDH	150	0	908.637	7.929	0.0084	[1]GTg>TGg,TGg>NTg
ASPDH	302	0	15.971	5.054	0.0367	[1]Atc>Gtc
ASPDH	407	0	43.424	8.874	0.0052	[1]aGc>aCc,agC>agA,Agc>Cgc
ASPDH	456	0	43.966	5.347	0.0315	[1]agA>agC,Aga>Gga,AgA>GgC,gGa>gAa
ASPDH	457	1.239	66.356	13.056	0.0006	[1]ACt>CTt,Gct>Act,gCT>gTG,GCT>TTG
TMEM135	458	0	25.014	4.641	0.0454	[1]tTt>tCt,ttT>ttG
NHSL2	206	0	910.686	6.689	0.0158	[1]Ttc>Atc
NHSL2	226	0	94.001	5.74	0.0258	[5]cGc>cAc
NHSL2	389	0	25.828	5.627	0.0273	[1]tCc>tTc
NHSL2	400	0	91.072	6.268	0.0197	[3]aGg>aAg
NHSL2	527	0	83.336	5.722	0.026	[1]cAt>cCt,Cct>Tct
NHSL2	891	0	898.014	7.304	0.0116	[1]gGc>gAc
NHSL2	911	0	79.559	5.799	0.025	[1]aAa>aGa
NHSL2	1142	0	26.884	5.645	0.0271	[1]aCc>aTc
TGFBR3	8	0	33.72	11.236	0.0016	[2]Gaa>Aaa
TGFBR3	12	0	18.338	6.138	0.021	[2]Act>Gct
TGFBR3	590	0	16.902	4.613	0.046	[2]aGc>aCc
CDHR3	388	0.985	91.152	1	0.002	[2]aCg>aTg
CDHR3	394	0	46.118	0.99	0.0161	[1]aGa>aCa,agA>agC,agC>agA
CDHR3	614	0	45.518	0.99	0.0121	[1]aAt>aGt,aGt>aAt,Agt>Cgt,Agt>Ggt
CDHR3	740	0	52.856	1	0.014	[2]Cac>Tac
CDHR3	853	0	46.561	1	0.0102	[2]Gca>Aca
ADAT2	15	0	1411.87	5.501	0.0291	[1]ggC>ggT,Ggt>Tgt
ADAT2	99	0	12.78	5.223	0.0336	[2]cGc>cAc
LAMA5	16	0	2148.26	22.955	0	[1]GCG>CGC,gCg>gTg
LAMA5	17	0	1256.19	12.464	0.0008	[1]cCg>cGg,CcG>GcT
LAMA5	18	0.576	678.416	14.327	0.0003	[1]cTg>cCg,ctG>ctC,CTG>GCC
LAMA5	19	0	2569.72	23.779	0	[1]CTG>GCC,Ctg>Ntg
LAMA5	20	0	2890.85	23.855	0	[1]CTG>GCC
LAMA5	21	1.184	254.698	9.631	0.0035	[1]gcC>gcG,GCc>TGc
LAMA5	23	0.522	1316.76	18.037	0.0001	[1]ctG>ctC,CTG>GCT
LAMA5	35	0.926	311.065	6.241	0.0199	[1]Cgg>Agg,cGg>cAg,CGg>GCg
LAMA5	46	0	2839.92	11.889	0.0011	[1]CcG>AcC
LAMA5	48	0	2102.79	5.928	0.0234	[1]TAC>CTA
LAMA5	50	0	880.609	7.712	0.0094	[1]AaC>CaA
LAMA5	51	0	1236.64	11.907	0.0011	[1]cTG>cCT
LAMA5	56	3.003	3054.24	5.634	0.0272	[1]cGC>cCG,cgC>cgA,cgC>cgT
LAMA5	57	0	8924.38	9.942	0.003	[1]ATC>CAT
LAMA5	58	0	20.612	5.869	0.0241	[1]Gcc>Ccc
LAMA5	64	1.09	3214.03	8.849	0.0053	[1]gGC>gCG,ggC>ggT
LAMA5	426	0	22.263	9.407	0.004	[2]cGc>cAc
LAMA5	651	0	85.954	5.149	0.0349	[3]cGc>cAc
LAMA5	711	0	162.268	5.847	0.0244	[2]gTg>gCg
LAMA5	753	0.897	1088.54	5.349	0.0315	[3]ccA>ccG
LAMA5	1219	0	11.424	4.93	0.0391	[2]Gcc>Acc
LAMA5	2049	0	443.171	6.493	0.0175	[1]cGc>cTc
LAMA5	2163	0	133.184	5.699	0.0263	[1]Gtg>Ctg,gtG>gtN
LAMA5	2235	0.27	113.104	5.811	0.0248	[2]cGa>cAa
LAMA5	2356	0	14.007	5.561	0.0282	[2]cGc>cAc
LAMA5	2539	0	965.695	14.307	0.0003	[1]CAg>GCg
LAMA5	2588	0	9.422	4.654	0.0451	[1]Ctc>Ttc
LAMA5	2976	0	297.518	5.106	0.0357	[1]Atc>Gtc,gTc>gGc
LAMA5	3210	0	11.883	4.737	0.0432	[2]Gcc>Tcc
LAMA5	3231	3.394	62.761	5.337	0.0317	[2]cGa>cCa,Tgg>Cgg
LAMA5	3297	0	397.851	5.502	0.0291	[1]cAg>cTg
LAMA5	3343	1.075	302.261	6.493	0.0175	[2]Ccc>Acc,Ccc>Gcc
LAMA5	3491	0	313.573	5.199	0.034	[2]gAg>gGg
LAMA5	3515	0	53.692	5.23	0.0335	[1]Gcc>Acc,gCc>gTc
LAMA5	3690	0	13.454	5.224	0.0336	[2]cCc>cTc
FOXH1	193	1.624	58.673	7.653	0.0097	[2]cGc>cCc
FOXH1	201	0.332	135.523	5.375	0.0311	[1]ACT>CTG,Act>Gct,gCt>gTt
DCHS1	16	0	34.395	6.512	0.0173	[1]cAg>cGg,Cgg>Tgg,Tgg>Cgg
DCHS1	124	0	128.88	6.409	0.0183	[1]Gcc>Acc
DCHS1	271	0	89.954	5.772	0.0253	[1]aGt>aAt
DCHS1	543	0	26.115	7.535	0.0103	[1]cCa>cTa
DCHS1	711	0	29.089	7.503	0.0105	[1]Cct>Gct
DCHS1	781	0	141.161	7.503	0.0105	[1]cCt>cTt,Cct>Gct,Cct>Tct
DCHS1	1454	1.296	6964.1	20.088	0	[1]GcG>AcC,GCG>CGC
DCHS1	1455	0.735	1935.09	18.904	0	[1]CTG>TGT,Ctg>Ttg
DCHS1	1456	0	3361.96	14.483	0.0003	[1]TAC>ACA
DCHS1	1457	1.432	193.2	9.4	0.004	[2]acT>acC
DCHS1	1459	1.287	8204.61	19.927	0	[1]cgC>cgG,CGC>GCG
DCHS1	1460	2.8	2041.23	16.33	0.0001	[1]GCG>CGT,gcG>gcC,gcG>gcT
DCHS1	1463	1.242	473.736	13.173	0.0006	[1]GCc>CGc,gcC>gcG
DCHS1	1704	0.78	395.648	4.61	0.0461	[1]acA>acC,aCc>aGc,aCc>aTc
DCHS1	2516	0	36.326	10.992	0.0018	[2]Gcc>Acc
DCHS1	2549	0	24.495	6.397	0.0184	[2]cGg>cAg
DCHS1	2948	0	2776.34	8.147	0.0075	[1]Gtg>Ctg
AHCTF1	257	0	35.358	5.543	0.0285	[1]gaA>gaT
AHCTF1	534	0	34.327	4.923	0.0392	[1]aTt>aCt,Att>Gtt
AHCTF1	810	0	40.583	7.224	0.0121	[1]caG>caC
AHCTF1	1287	0	449.607	7.858	0.0087	[2]Ccc>Tcc
AHCTF1	1297	0	208.154	5.625	0.0273	[1]gaA>gaT,gAa>gCa
AHCTF1	1389	0	25.675	6.644	0.0162	[1]gGc>gAc
AHCTF1	1391	0	60.59	7.837	0.0088	[1]tTa>tCa
AHCTF1	1445	0	97.436	5.748	0.0257	[2]Gaa>Aaa
AHCTF1	1488	0	97.417	9.132	0.0046	[2]Cat>Gat
AHCTF1	1802	0	41.117	5.716	0.0261	[1]Tct>Gct,tCt>tGt
AHCTF1	1949	0	113.513	5.797	0.025	[1]Gtt>Att
AHCTF1	1997	0	32.763	6.092	0.0215	[2]gTa>gCa
AHCTF1	2091	0	29.917	5.986	0.0227	[1]gaC>gaA,gAc>gCc
AHCTF1	2176	0.773	32.17	4.592	0.0466	[2]cGg>cAg
AHCTF1	2243	0	32.817	6.04	0.0221	[1]gGa>gAa,gGa>gCa
PAPPA2	178	0	14.744	4.551	0.0475	[2]Cgc>Tgc
PAPPA2	418	0	24.801	6.516	0.0173	[1]Tat>Cat,tAt>tCt,tAt>tGt,TcT>CcN
PAPPA2	569	0	14.175	4.752	0.0428	[2]Gtc>Atc
PAPPA2	649	0	46.128	5.392	0.0308	[4]gCg>gTg
PAPPA2	966	0	15.28	5.12	0.0354	[1]Ctc>Ttc
PAPPA2	1193	0	13.905	4.586	0.0467	[1]aCc>aTc,Acc>Gcc,aTc>aGc
PAPPA2	1261	0	43.03	5.266	0.0329	[3]Gat>Aat
PAPPA2	1405	1.259	30.935	6.3	0.0193	[2]Gcg>Acg
TEDDM1	257	0	7.725	4.628	0.0457	[2]cGt>cAt
TEDDM1	268	0	15.294	9.772	0.0033	[2]Gct>Act
FFAR1	86	0	10.159	4.607	0.0462	[3]gTc>gCc
FFAR1	212	0	13.406	4.931	0.0391	[2]Cgc>Ggc
ECI2	25	0.41	3045.85	14.335	0.0003	[1]cAG>cCC,cAG>cCT,cCA>cAG,Cca>Tca
ECI2	27	0.421	3398.82	24.689	0	[1]CTG>TCC,cTt>cCt,ctT>ctG,TCC>CTG
ECI2	28	0	3543.28	25.38	0	[2]CCC>AGG
ECI2	43	1.249	10000.000...	4.865	0.0404	[2]ttT>ttC
ECI2	210	1.011	2271.8	8.445	0.0065	[1]Cct>Act,ccT>ccC,CcT>GcC,GCC>CGG
ECI2	216	0	704.183	8.878	0.0052	[3]aGa>aAa
ECI2	217	1.179	840.304	9.157	0.0045	[2]gcC>gcT
ECI2	224	0	125.243	9.005	0.0049	[1]CTg>GAg,Ctg>Gtg
B3GAT3	22	0	25.645	7.823	0.0089	[1]AGg>GAg,Agg>Ggg,gGg>gCg
B3GAT3	57	0	156.702	5.862	0.0242	[1]gCg>gAg
B3GAT3	203	0	33.787	9.605	0.0036	[1]gGg>gAg,gGg>gTg
PROX2	254	0.887	37.277	4.668	0.0448	[1]Aga>Gga,AgA>GgG,Ggg>Agg,gGg>gCg
PROX2	461	0.735	97.544	12.516	0.0008	[1]Gct>Act,gcT>gcC,gCt>gTt
MGARP	139	2.997	111.271	4.849	0.0408	[1]cCC>cAA,cCc>cAc,ccC>ccG,ccT>ccC
MGARP	165	1.777	447.508	15.177	0.0002	[2]gcG>gcA
MGARP	202	0	293.225	16.843	0.0001	[1]Gaa>Aaa,Gaa>Caa
HECTD4	1237	0	101.564	8.754	0.0055	[1]gAa>gCa
HECTD4	2152	1.354	75.009	5.035	0.037	[1]aaA>aaG,aaG>aaC,Aag>Nag
HECTD4	2946	0	77.973	7.834	0.0088	[4]Gtc>Atc
HECTD4	3113	7.94	284.13	7.718	0.0094	[4]ccA>ccG
HECTD4	3351	0	72.604	7.422	0.0109	[2]Gtg>Atg
HECTD4	3476	0	57.974	6.631	0.0163	[1]aGc>aAc,Agc>Ggc,Ggc>Agc
ABCB4	24	0.001	31.066	5.216	0.0337	[1]Ttt>Ctt,tTt>tCt
ABCB4	31	0	33.371	9.991	0.003	[2]aAc>aGc
ABCB4	369	0	54.654	11.496	0.0014	[1]tAt>tGt,tAt>tTt
ABCB4	608	0	32.041	5.838	0.0245	[1]Ttt>Ctt,tTt>tGt,ttT>ttG
DDX56	324	1.685	39.998	6.825	0.0148	[2]ccG>ccA
SLC17A8	26	0	18.186	5.558	0.0283	[2]Gtg>Ttg
SLC17A8	124	0	23.495	8.52	0.0062	[2]Aac>Gac
SLC17A8	261	0	13.362	4.667	0.0448	[2]Att>Gtt
GYS2	223	1.23	23.075	5.031	0.0371	[1]caC>caG,cAc>cGc,caT>caC,cAt>cGt
CLEC9A	151	0	33.148	6.38	0.0186	[1]caA>caT
CLEC9A	205	2.123	49.253	6.756	0.0153	[3]Ccc>Tcc
NOL6	281	0	954.552	10.225	0.0026	[2]cGa>cAa
NOL6	400	1.078	46.333	7.952	0.0083	[1]Aat>Tat,Gat>Aat,gaT>gaC
NOL6	443	0	27.145	5.985	0.0227	[3]cGg>cAg
NOL6	529	0	24.023	6.796	0.015	[1]Tct>Act
NOL6	582	0	21.879	4.499	0.0488	[1]Cag>Aag
NOL6	678	0	27.774	6.801	0.015	[1]gaA>gaT,Gat>Aat
NOL6	756	1.424	37.787	6.47	0.0177	[1]Cgc>Tgc,cGg>cAg,cgG>cgC
NOL6	809	0	305.99	5.631	0.0272	[1]gAg>gCg
NOL6	827	0	17.96	5.188	0.0342	[3]Cgc>Tgc
NR2E3	36	0	23.718	9.141	0.0045	[1]Ccc>Gcc,Ccc>Tcc
NR2E3	165	0	8.218	4.567	0.0472	[3]cGg>cAg
NID2	7	0	20.988	6.532	0.0172	[1]GCG>ANN,Ggg>Agg,gGg>gCg
NID2	340	0	13.083	6.318	0.0192	[1]Cca>Aca,cCa>cTa
NID2	393	0.53	25.434	8.337	0.0068	[2]cCt>cTt
NID2	813	0	11.383	5.891	0.0238	[1]cGg>cAg
NID2	1274	2.46	148.177	6.425	0.0181	[3]gaT>gaC
NID2	1275	0	10000.000...	24.18	0	[1]GGT>AAA
NID2	1310	0	42.675	6.63	0.0163	[2]gGa>gAa
NID2	1311	0.659	228.202	10.296	0.0025	[2]AGa>GAa
NID2	1312	0	260.647	10.585	0.0022	[2]aAG>aGT
RAB27A	6	0	121.159	6.186	0.0205	[2]aGa>aAa
RAB27A	7	0	31.414	7.939	0.0084	[1]gCc>gTc,GCc>NAc
RAB27A	10	0	26.77	5.262	0.0329	[1]cCc>cTc
RAB27A	15	0	775.204	18.897	0	[1]CGC>GTN,Cgc>Tgc,gCc>gNc,TGc>GCc
RAB27A	67	0.123	22.725	5.037	0.037	[1]Gag>Aag,gGT>gAG
RAB27A	87	0	608.62	7.382	0.0111	[1]Aga>Gga
RAB27A	155	0.961	56.611	6.659	0.0161	[1]Cca>Gca,Gca>Cca,GCA>TGC,Tac>Aac,TAC>CG...
RAB27A	175	0.519	22.906	4.743	0.0431	[1]agT>agA,agT>agC,Ggt>Agt
RAB27A	182	0	391.575	8.809	0.0054	[1]gTg>gAg,gTg>gCg
RAB27A	203	0	26.025	5.863	0.0242	[2]cAg>cGg
SLC5A7	553	0	20.659	10.125	0.0028	[2]Ata>Cta,Ata>Gta
SERPINE3	19	0	23.414	12.598	0.0008	[2]gGa>gAa
BUD13	28	0.779	97.543	8.726	0.0056	[2]gGc>gCc
BUD13	165	0	22.114	6.847	0.0146	[1]gaT>gaG,gAt>gCt
BUD13	176	0.915	22.22	6.229	0.0201	[2]aCc>aGc,aCc>aNc
BUD13	188	1.046	25.038	5.61	0.0275	[1]gaC>gaT,gAc>gCc,GAc>TGc
BUD13	199	0	11.408	4.592	0.0465	[3]cGt>cAt
BUD13	300	0	30.158	4.958	0.0385	[1]cCa>cTa,Cca>Gca
BUD13	358	1.672	71.17	5.92	0.0235	[1]caT>caC,cAt>cGt,CAt>TGt
C16H1orf74	107	0	33.682	5.396	0.0307	[3]Ata>Gta
C16H1orf74	132	0	164.705	15.606	0.0002	[1]gCc>gTc,Gcc>Tcc
MVK	379	0	231.88	5.883	0.0239	[3]Aac>Gac
CCDC113	62	0	21.024	6.018	0.0223	[2]cCt>cTt,Cct>Tct
CCDC113	80	0	18.13	5.532	0.0287	[1]aGc>aAc,Agc>Ggc,Ggc>Agc
CCDC113	187	0	34.682	5.636	0.0272	[1]Cag>Aag,caG>caN
CCDC113	267	1.979	255.744	6.679	0.0159	[1]cAa>cGa,CAa>TTa,cGa>cAa,cGa>cCa,Cga>Ng...
CCDC113	323	0	21.84	6.143	0.021	[1]gCt>gTt
CCDC113	339	0	60.25	10.271	0.0026	[2]cAg>cCg
CCDC113	386	0	25.188	5.074	0.0363	[1]gAg>gCg
BTBD7	627	0	17.732	5.274	0.0327	[1]Atc>Gtc
BTBD7	929	0.001	24.627	5.806	0.0249	[1]Aca>Cca
BTBD7	943	0	14.534	4.509	0.0486	[1]gAc>gGc
BTBD7	993	0	31.983	6.794	0.015	[1]aCc>aTc,Acc>Tcc
BTBD7	1048	0	43.573	11.381	0.0015	[1]gCc>gTc,Gcc>Tcc
SYCP2L	78	0	10.778	5.186	0.0342	[2]Cgg>Tgg
SYCP2L	510	0	10.144	4.928	0.0391	[1]cCt>cAt,cCt>cTt,Cct>Tct
SYCP2L	528	0	10.885	5.089	0.036	[2]aCt>aTt,Act>Cct
SYCP2L	584	0	148.856	5.634	0.0272	[1]aAa>aCa,aAa>aGa,Aaa>Gaa
SYCP2L	712	0	10.95	6.094	0.0215	[1]Acc>Gcc,Gcc>Tcc,Tcc>Gcc
SYCP2L	752	0	16.005	7.406	0.011	[2]Ctg>Gtg
SYCP2L	870	0	31.162	5.234	0.0334	[1]Ctt>Ttt
SYCP2L	921	1.993	24.167	4.799	0.0418	[2]ctT>ctG,Ctt>Ttt
SYCP2L	939	0	10.894	4.672	0.0447	[1]TtC>NtG
ATP1A4	112	0	123.09	6.404	0.0183	[1]Atc>Ctc,Ctc>Ttc
ATP1A4	136	0	124.277	6.28	0.0195	[1]Acc>Ccc,Acc>Gcc
ATP1A4	237	0	95.966	6.141	0.021	[1]Cgc>Tgc
ATP1A4	360	0	25.928	10.019	0.0029	[1]Cgc>Agc,Cgc>Tgc,Tgc>Cgc
ATP1A4	496	0	97.21	5.084	0.0361	[2]aAc>aCc
ATP1A4	843	0	43.862	13.347	0.0005	[1]Gct>Cct,gCt>gAt
ATP1A4	901	0	122.345	8.285	0.007	[1]cGa>cAa,CGa>TCa
ATP1A4	1020	0	12.487	5.383	0.031	[2]Cat>Tat
WDR11	120	0	136.52	7.422	0.0109	[1]Gtt>Att
WDR11	978	1.812	76.571	8.881	0.0052	[4]cGg>cAg
WDR11	996	0.995	65.096	9.724	0.0034	[1]Gcc>Acc,gcC>gcG,Gcc>Tcc
NPC1L1	311	0	10000.000...	6.287	0.0195	[2]Gag>Aag[1]gaC>gaG,gAc>gGc,gAC>gGG,GAc...
NPC1L1	420	0	200.19	5.899	0.0237	[1]cGg>cAg
NPC1L1	529	0	18.57	8.109	0.0077	[2]gCc>gTc
NPC1L1	1271	0	134.61	5.669	0.0267	[2]gaT>gaG[1]Gat>Aat
NPC1L1	311	0	10000.000...	6.287	0.0195	[2]Gag>Aag[1]gaC>gaG,gAc>gGc,gAC>gGG,GAc...
NPC1L1	420	0	200.19	5.899	0.0237	[1]cGg>cAg
NPC1L1	529	0	18.57	8.109	0.0077	[2]gCc>gTc
NPC1L1	1271	0	134.61	5.669	0.0267	[2]gaT>gaG[1]Gat>Aat
GCC1	72	0	42.762	5.308	0.0322	[1]aGt>aTt,Ggt>Agt
GCC1	298	0	8.232	5.409	0.0305	[3]cGt>cAt
GCC1	691	0	402.089	5.133	0.0352	[1]gAg>gGg
INSIG1	46	0.826	113.488	7.346	0.0113	[1]ccC>ccT,CCc>TAc
INSIG1	150	0	10.372	5.3	0.0323	[2]cAc>cGc
ARID2	1187	0	2546.19	6.564	0.0169	[1]AGt>NTt
ARID2	1195	0	583.089	5.546	0.0285	[1]Att>Ttt
ARID2	1198	0	10000.000...	28.267	0	[1]GCA>CAT
CRACR2A	18	0	306.58	6.267	0.0197	[3]cGg>cAg[1]cAg>cCg,cAg>cTg,Cgg>Tgg
CRACR2A	141	0	5.784	4.656	0.045	[1]Aga>Gga
CRACR2A	169	0	7.07	5.048	0.0368	[1]gTt>gCt
CRACR2A	224	0	11.965	9.46	0.0039	[3]Gct>Act
CRACR2A	314	0	49.137	5.016	0.0374	[2]cGg>cAg[1]cGg>cTg
CRACR2A	395	0	134.11	5.835	0.0245	[1]Gct>Act,gCt>gAt
CRACR2A	448	0	1230.36	7.885	0.0086	[1]Gaa>Caa
CRACR2A	532	4.293	10000.000...	6.139	0.021	[1]ccG>ccA,cCg>cTg,GcG>CcT,gcG>gcC,GTg>CC...
CRACR2A	535	0	7.158	5.163	0.0347	[1]cCa>cTa
CRACR2A	637	0	5.42	4.573	0.047	[1]Cgt>Tgt
CA12	154	0	32.118	4.654	0.0451	[2]cTg>cGg[1]cGg>cAg
CA12	325	0.73	10.114	4.641	0.0454	[2]Att>Gtt[1]atT>atC,Att>Ctt
MNS1	231	0	113.885	5.543	0.0285	[1]gAa>gGa
MNS1	414	2.149	51.933	5.831	0.0246	[1]gaA>gaC,gaA>gaG,gAa>gCa
MNS1	417	0	14.576	5.938	0.0233	[1]cGc>cAc
RB1	14	0	103.413	5.805	0.0249	[1]Gcc>Acc
RB1	410	0	14.88	5.122	0.0354	[1]Gtg>Atg
RB1	441	0	500.778	4.901	0.0397	[1]gaA>gaT
RB1	859	0	30.539	10.298	0.0025	[2]gTg>gCg
PHF20L1	724	0	14.822	5.061	0.0365	[2]Atc>Gtc
WWP1	55	0	130.655	5.843	0.0244	[1]gCa>gAa
WWP1	71	0	48.908	5.598	0.0277	[1]Gta>Ata
WWP1	123	0	886.82	9.043	0.0048	[1]Tcc>Acc,tCc>tGc
WWP1	190	0	29.35	6.312	0.0192	[2]Ata>Gta
WWP1	293	1.757	128.553	5.079	0.0362	[3]aAt>aGt[1]aaT>aaC,Aat>Gat
AMPD3	106	0	13.681	7.092	0.0129	[2]Gcc>Acc
AMPD3	197	0	9.316	5.675	0.0266	[1]cCa>cAa
METTL18	95	0	15.05	4.682	0.0444	[2]Cag>Aag[1]Aag>Gag
METTL18	259	0	20.995	7.095	0.0129	[2]Gca>Aca[1]gCa>gTa
METTL18	308	0	35.503	7.106	0.0128	[1]Caa>Gaa,Gaa>Aaa
HHIP	69	0.724	29.057	8.298	0.007	[2]cTg>cCg[1]ctG>ctC
BRAP	87	0	159.791	6.079	0.0217	[1]Gct>Act
BRAP	90	0	27.589	5.373	0.0311	[1]Gaa>Aaa,gaA>gaT
BRAP	489	0	25.61	5.479	0.0295	[1]aAa>aGa
BRAP	508	0	44.958	9.594	0.0036	[2]aAg>aGg
BRAP	515	0	23.923	5.83	0.0246	[1]Gtg>Atg
PRF1	43	0	68.186	5.319	0.032	[1]gTg>gCg
PRF1	387	0	14.612	5.547	0.0284	[2]cCc>cGc
PRF1	469	0	9.585	5.05	0.0367	[3]cAg>cGg[2]cGg>cAg
TXLNG	113	0	38.176	12.59	0.0008	[2]cGa>cAa
TXLNG	149	0.751	10000.000...	5.594	0.0278	[1]acC>acT,aCT>aAN
TXLNG	478	1.549	45.987	7.476	0.0106	[2]Gcc>Acc[1]cTc>cAc,ctC>ctG,GCc>CTc,gcC...
TXLNG	487	1.675	5740.9	4.856	0.0406	[2]Ccc>Tcc[1]ccC>ccT,Ccc>Gcc,GCC>TGT,tcC...
TXLNG	500	0	38.199	5.582	0.0279	[1]Gag>Cag,gaG>gaT
NOL9	344	0	13.356	5.957	0.0231	[1]Ctt>Gtt
NOL9	471	0	24.442	11.5	0.0014	[1]tTg>tCg,ttG>ttT,tTt>tCt
NOL9	673	0	142.633	6.48	0.0176	[1]Gca>Aca,gCa>gTa
NOL9	678	0	11.165	5.27	0.0328	[1]Gaa>Aaa,gAa>gCa,Gca>Aca
LOC524650	32	0	42.836	5.616	0.0275	[2]Att>Ctt
LOC524650	47	0	54.649	9.928	0.0031	[4]gCt>gTt[2]aCt>aTt[1]Act>Gct,ACt>GTt,...
LOC524650	67	0	84.521	9.387	0.004	[1]Gat>Aat,gaT>gaA
LOC524650	143	0	26.237	5.187	0.0342	[1]aCt>aTt,Act>Gct
LOC524650	145	0	382.411	6.657	0.0161	[1]Gaa>Aaa
NCAPG2	24	0	10.382	5.34	0.0316	[1]Att>Gtt
NCAPG2	25	0	27.84	12.625	0.0008	[1]cAa>cGa,Caa>Gaa
NCAPG2	287	0	10.16	5.161	0.0347	[2]Atc>Gtc
NCAPG2	625	0	9.869	5.45	0.0299	[1]gTg>gCg
NCAPG2	997	0	90.721	5.857	0.0243	[2]Gtg>Atg[1]GTg>CCg
LPCAT3	54	0	97.045	6.212	0.0202	[1]Gct>Tct
LPCAT3	94	1.276	29.536	6.162	0.0207	[1]ctA>ctC,ctA>ctG,CTc>TGc,Ctc>Ttc
LPCAT3	166	0	21.38	9.262	0.0043	[1]AaA>GaC,aaT>aaA
MGA	293	0	209.564	5.854	0.0243	[1]aTc>aCc,Gtc>Atc,gTc>gCc
MGA	630	0	23.429	5.095	0.0359	[1]Aca>Gca
MGA	889	0	26.634	5.348	0.0315	[1]gTa>gAa
MGA	1124	0	57.641	4.575	0.047	[1]gaA>gaC
MGA	1429	0	10000.000...	9.714	0.0034	[1]aTc>aAc,Atc>Gtc
MGA	1962	0	23.336	4.976	0.0382	[2]Gca>Aca
MGA	2128	0	23.915	4.598	0.0464	[1]Aaa>Gaa
MGA	2168	1.475	2718.32	5.393	0.0308	[1]TtA>GtG,ttA>ttG
MGA	2206	0	26.002	5.756	0.0256	[2]gCc>gTc[1]Gtc>Ctc
MGA	2241	0	30.55	5.069	0.0364	[1]Caa>Gaa
MGA	2421	0	503.392	13.444	0.0005	[1]aCc>aGc,Acc>Gcc,aGC>aAA
MGA	2422	2.304	10000.000...	16.012	0.0001	[1]acA>acG,aCa>aTa,ACA>GAG
MGA	2423	0	1485.61	15.088	0.0002	[1]Gct>Act,GCt>CAt,gCt>gAt
MGA	2439	0	22.697	5.031	0.0371	[1]Gca>Aca
MGA	2604	0	28.738	4.847	0.0408	[2]Tct>Cct
MGA	2688	0	26.587	4.722	0.0435	[1]gCt>gTt,Gct>Tct
MGA	2720	0	19.729	5.284	0.0326	[1]Ggc>Agc
MGA	3083	0	3168.08	7.643	0.0097	[1]aCa>aAa
MGA	3106	0	785.648	6.67	0.016	[1]Ggc>Agc
MGA	3110	0	22.63	5.526	0.0288	[2]gCc>gTc
BORA	6	3.689	2527.51	6.014	0.0224	[2]Agc>Ggc,gGG>gCT[1]AgC>GgT,gGt>gCt,ggT...
BORA	293	0	27.204	11.427	0.0014	[1]Gtg>Ctg,gTg>gCg
BORA	305	0	6339.33	14.282	0.0003	[1]tCA>tAT,tTa>tCa
BORA	306	0	51.209	6.121	0.0212	[3]Tca>Nca[1]tTa>tCa
BORA	534	0	8.737	5.179	0.0344	[2]Gtg>Atg,gTg>gGg
BORA	608	0	10.351	4.826	0.0412	[2]aCa>aTa,Aca>Gca
COMMD7	3	1.225	607.448	6.223	0.0201	[1]ggC>ggT,GgC>TgG
COMMD7	4	1.212	136.843	8.394	0.0066	[1]cgC>cgG,CGc>GCc
COMMD7	5	0.825	987.934	14.375	0.0003	[1]cTg>cGg,ctG>ctA,CTG>GCC
COMMD7	6	0	40.148	7.789	0.009	[1]CAc>TGc
COMMD7	271	0	22.102	8.898	0.0051	[2]cGt>cAt,Ggt>Cgt[1]gGt>gAt
SPEN	717	0	14.019	4.667	0.0448	[1]gaC>gaG
SPEN	844	0	139.219	5.224	0.0336	[1]gaG>gaC
SPEN	892	0	149.716	5.363	0.0313	[1]Att>Gtt
SPEN	930	0	165.675	7.002	0.0135	[2]tTg>tCg
SPEN	953	0	13.549	5.275	0.0327	[1]gTa>gCa
SPEN	996	0	19.207	5.834	0.0246	[2]gCa>gTa[1]gTa>gCa,Gta>Tta
SPEN	1041	0	113.69	4.86	0.0405	[2]Atg>Gtg[1]aTg>aCg,Gtg>Atg
SPEN	1239	0	30.277	9.273	0.0043	[1]Ggc>Agc,Tgc>Ggc,tGc>tCc
SPEN	1787	0	162.081	6.327	0.0191	[1]Cct>Tct
SPEN	2056	0	15.663	5.616	0.0275	[3]Acc>Gcc
SPEN	2072	0	15.991	5.667	0.0267	[1]Tcc>Ccc
SPEN	2400	0	12.473	4.498	0.0489	[2]Agc>Ggc
SPEN	2419	3.48	70.485	4.925	0.0392	[2]ccG>ccA[1]ccA>ccG,Ccg>Gcg,CCg>GTg
SPEN	2469	0	12.968	4.789	0.042	[2]Att>Gtt[1]aTt>aCt
SPEN	2588	0	15.371	5.484	0.0294	[1]gTa>gGa
SPEN	2772	0	313.416	8.057	0.0079	[1]Ata>Gta,GtG>AtA
SPEN	3004	0	15.724	5.615	0.0275	[2]Gtg>Atg
SPEN	3067	0	496.384	6.994	0.0136	[1]gGc>gCc
SPEN	3364	0	231.742	6.717	0.0156	[2]tGc>tCc[1]Tcc>Gcc,tCc>tGc
SPEN	3366	0	69.609	8.159	0.0075	[2]cTc>cCc[1]cCc>cTc
SPEN	3438	0	15.582	5.376	0.0311	[2]Gct>Act
SPEN	3464	0	516.291	6.257	0.0198	[1]cAt>cTt,Ctt>Att
RGL1	16	0	115.22	5.267	0.0329	[1]aAa>aGa
SLC35E4	338	0	12.684	6.361	0.0187	[1]cGc>cAc,Cgc>Tgc
B3GNT8	159	0.302	226.228	4.564	0.0472	[1]gaA>gaG,gAa>gGa
B3GNT8	272	0	7.708	5.936	0.0233	[1]Ggc>Agc,gGc>gTc
B3GNT8	409	0.789	1242.89	8.582	0.006	[1]gGG>gCA,gGg>gCg,ggG>ggT,GGG>NCN,Ggg>Tg...
B3GNT8	419	3.008	2266.86	11.762	0.0012	[1]cTg>cCg,cTG>cCT,cTG>cGA,cTG>cGC,CTg>TG...
B3GNT8	420	0	115.414	9.391	0.004	[11]CGa>NNa[2]cAa>cGa,CAc>NNc,GgC>NgN[1...
PNMA8A	36	0	41.129	4.459	0.0499	[2]gCg>gTg[1]Gcg>Ccg
PNMA8A	44	0	103.67	5.019	0.0373	[1]Ggg>Agg
PNMA8A	111	0	42.406	4.974	0.0382	[1]Gaa>Aaa
PNMA8A	203	1.29	48.41	5.255	0.0331	[1]Gca>Aca,gcA>gcC,gcA>gcG,gCg>gTg
PNMA8A	275	0	58.688	11.44	0.0014	[1]GCt>ATt
PNMA8A	276	0	544.213	6.714	0.0156	[1]gAt>gTt,gGt>gAt
PNMA8A	291	0	12.512	8.71	0.0057	[1]aAa>aGa,Aaa>Gaa
PNMA8A	319	0.854	1963.6	23.892	0	[2]Cac>Gac,Cgt>Tgt[1]caC>caT,cAc>cCc,cAc...
PNMA8A	320	0	29.822	7.192	0.0123	[2]gAa>gCa[1]gAa>gGa,gAa>gTa,Gca>Aca,gCa...
PNMA8A	365	0	6.462	4.627	0.0457	[1]cCt>cAt,Cct>Tct
PNMA8A	413	0	66.659	8.143	0.0075	[1]cAg>cGg,Cgg>Ggg
PNMA8A	456	0	550.867	6.497	0.0175	[1]CAG>AGA,Gag>Cag
PNMA8A	457	0	18.175	8.269	0.0071	[1]GaA>AaC
PNMA8A	463	0	48.484	6.826	0.0148	[1]AgT>GgG,gAt>gTt,Ggt>Agt,GGt>CAt,gGt>gA...
SLC1A3	5	0	95.877	4.889	0.0399	[1]aGc>aAc
MAGI1	32	3.234	248.61	7.339	0.0114	[1]acG>acA,acG>acC,ACg>GGg
MAGI1	207	0	239.502	5.625	0.0273	[1]gCc>gTc
MAGI1	424	0	33.169	10.934	0.0018	[1]Tca>Aca,Tca>Cca
MAGI1	943	0	532.525	13.16	0.0006	[1]CAg>ATg
MAGI1	946	3.147	10000.000...	11.107	0.0017	[2]tcG>tcA[1]TCG>AGC,tcG>tcC
MAGI1	1314	0	151.353	5.301	0.0323	[1]Ccc>Tcc
TNFRSF21	62	0	352.685	5.34	0.0316	[1]gTg>gAg
TNFRSF21	233	0	15.411	5.684	0.0265	[1]cAc>cCc,cAc>cGc
C28H10orf99	70	0	9.92	5.605	0.0276	[2]Cca>Aca[1]aCa>aAa,cCa>cAa,Cca>Tca
ZC3H12B	11	0	20.403	5.172	0.0345	[2]Cca>Tca[1]cCa>cTa
ASB12	165	0	124.619	4.701	0.044	[1]Gaa>Aaa,gaA>gaC
ASB12	175	0	14.998	4.782	0.0422	[1]gGa>gAa
ASB12	254	0	18.704	4.781	0.0422	[1]Gct>Tct
ASB12	297	0	17.571	5.129	0.0353	[1]aCa>aGa
ASB12	346	0	14.156	4.721	0.0435	[1]aCa>aTa
ASB12	478	0	17.404	5.094	0.0359	[1]gGc>gTc
ASB12	487	0	15.873	4.573	0.047	[1]cCt>cTt
ASB12	555	0	196.466	5.807	0.0249	[2]GGg>NNg[1]Ggg>Tgg
ASB12	685	0	727.499	6.762	0.0153	[1]aCa>aTa,Ata>Cta,Gca>Aca
PI4KB	12	0	21.397	7.27	0.0118	[1]Gcc>Acc,gCc>gTc
WDR3	111	0	204.257	5.768	0.0254	[3]Atc>Gtc
WDR3	462	0	266.699	5.431	0.0302	[1]ttC>ttG
WDR3	644	0	11.076	4.918	0.0393	[1]Ccc>Tcc
WDR3	732	0	22.8	8.032	0.008	[1]gaC>gaG,gAc>gGc
WDR3	788	0	8133.88	19.621	0	[1]gAG>gTT
WDR3	794	0	423.873	5.599	0.0277	[1]aAc>aGc,aGc>aAc
WDR3	904	0	188.211	4.885	0.04	[1]Gat>Aat

## Sheet: Tables8
Table.S8 The GO terms of convergent amino acid substitution genes among Camelus and Hippotraginae
#Term	Database	ID	Input number	Background number	P-Value	Corrected P-Value	Input
cholesterol biosynthetic process	Gene Ontology	GO:0006695	3	40	0.000656602	0.0293328	MVK|NPC1L1|INSIG1
cardiac muscle cell proliferation	Gene Ontology	GO:0060038	2	14	0.00177969	0.051942	TGFBR3|ARID2
sodium ion transport	Gene Ontology	GO:0006814	3	77	0.00393121	0.0785322	ATP1A4|SLC17A8|SLC5A7
positive regulation of calcium ion transport	Gene Ontology	GO:0051928	2	27	0.00582294	0.0936896	FFAR1|CRACR2A
regulation of lipid metabolic process	Gene Ontology	GO:0019216	3	92	0.00634535	0.0983137	RGL1|TNFRSF21|ABCB4

## Sheet: Tables9
Table.S9 The GO terms of convergent amino acid substitution genes among control groups
#Term	Database	ID	Input number	Background number	P-Value	Corrected P-Value	Input
protein binding	Gene Ontology	GO:0005515	98	11779	2.05683e-16	2.7397e-13	TMOD4|NRCAM|SYMPK|IKBKE|CACNA1I|DNTT|MPP6|GSE1|TMEM59|CDH5|RNASEL|FMO3|AQP5|SCNN1A|CRTAC1|LPP|SSH1|TESK1|RBM46|DZIP1|APP|TERF2|SPO11|TAF5L|NUP205|ZBTB25|DTL|NOP2|KHDRBS2|POLR1C|EXOC3L2|NCKAP5L|FAM196A|PARPBP|UBE3C|C4BPB|HAUS1|HSBP1L1|TMEM187|GCC1|TRAF3IP3|MPDZ|C11orf1|RAB3GAP2|RECQL|DYNC1LI1|PYM1|REV1|BCAM|LRIG3|VASH1|SH3D19|GFM1|CABP5|CD276|FETUB|PCNT|SH2D1B|PSTPIP1|HFE|TMEM86A|TMEM86B|KRT81|TBC…
cytosol	Gene Ontology	GO:0005829	51	5095	4.1821e-10	2.78528e-07	KARS|IKBKE|AGK|APP|DTL|SH2D1B|SYMPK|MPP6|SPATS2|ARFGEF2|CIT|PSTPIP1|PATJ|BCL2L10|DNTT|ASMT|HKDC1|KRT81|TBC1D2|OPHN1|HAUS1|HSBP1L1|PLCH1|GCC1|METTL10|ACOT13|RNASEL|PYM1|FGD4|BRCA2|RAB3GAP2|PPP1R12B|LPP|PCNT|KRTAP13-2|SSH1|PRMT5|TESK1|TAX1BP1|EXOC6|PEX7|DZIP1|SH3D19|CABP5|OAZ3|ZNF438|PITPNM1|APAF1|AIFM3|ELP2|DYNC1LI1
plasma membrane	Gene Ontology	GO:0005886	42	4619	3.58796e-07	0.00013823	KARS|STAB1|CPM|DTL|NRCAM|SYMPK|SLCO1B3|SEMA4B|SLC5A8|LPP|PATJ|HFE|GPR33|CACNA1I|C4BPB|MPP6|SYT13|PLCH1|SCNN1A|TMEM59|CDH5|ENTPD6|AQP5|RAB3GAP2|STRA6|CA12|SCCPDH|APPL2|BCAM|DYNC1LI1|MUC19|SSH1|EXOC6|CAMKV|CYP24A1|LRIG3|SH3D19|APP|SLC17A3|ANPEP|ANTXRL|PSTPIP1
nucleoplasm	Gene Ontology	GO:0005654	36	3630	4.15107e-07	0.00013823	DTL|SYMPK|C11orf1|KHDRBS2|GON4L|IKBKE|HFE|DNTT|PARPBP|TBC1D2|MPP6|TAF4B|PPRC1|PPP1R12B|CDH5|ZNF438|ASH1L|BRCA2|NOP2|PRMT5|RECQL|MCM2|PYM1|REV1|TAF1A|CYP24A1|HIRA|DZIP1|SH3D19|SETX|OAZ3|TERF2|MAMLD1|SALL1|ELP2|ZBTB25
DNA binding	Gene Ontology	GO:0003677	18	1209	2.59167e-06	0.000690421	ZNF7|TAF1A|POLR1C|DNTT|HIRA|PARPBP|APP|APPL2|ASH1L|ZNF623|TAF4B|SPO11|RECQL|MCM2|SALL1|SETX|ZNF438|EEPD1
cytoplasm	Gene Ontology	GO:0005737	39	4624	6.5974e-06	0.00146462	AGK|DTL|IKBKE|SYMPK|RIPK4|CIT|PSTPIP1|TMEM86B|NCKAP5L|PARPBP|OPHN1|HSBP1L1|TAF4B|PLCH1|SCNN1A|METTL10|SETX|MPDZ|PYM1|FGD4|SPATS2|PPP1R12B|CYP2A13|TXLNB|PRMT5|RECQL|MCM2|SSH1|TESK1|VASH1|DZIP1|APP|OAZ3|SLC17A3|PITPNM1|ANPEP|SALL1|ELP2|ZBTB25
spermatogenesis	Gene Ontology	GO:0007283	9	404	4.99148e-05	0.00949808	BRCA2|BCL2L10|DZIP1|OAZ3|TAF4B|SPO11|SETX|TESK1|KIFC1
metal ion binding	Gene Ontology	GO:0046872	23	2298	6.13453e-05	0.010214	CIT|ZNF7|DNTT|ZNF623|ZNF516|RNASEL|FGD4|ASH1L|LPP|SALL1|MCM2|OMA1|ANTXRL|REV1|TRMT1L|TESK1|TAX1BP1|DZIP1|ZNF438|SPO11|AIFM3|POMT2|ZBTB25
nucleus	Gene Ontology	GO:0005634	39	5208	9.59114e-05	0.0141949	KARS|DTL|GPATCH1|PPRC1|KHDRBS2|ZNF516|GON4L|IKBKE|ZNF7|DNTT|UBE3C|MPP6|ZNF623|HSBP1L1|METTL10|ACOT13|SETX|ZNF438|APAF1|ASH1L|BRCA2|SCCPDH|LPP|APPL2|RECQL|MCM2|AIFM3|PRMT5|TRMT1L|TESK1|KIFC1|RBM46|HIRA|DZIP1|PRR12|OAZ3|TERF2|SALL1|TAF5L
ATP binding	Gene Ontology	GO:0005524	17	1463	0.000108317	0.0144278	KARS|TRIT1|AGK|TESK1|HKDC1|IKBKE|CAMKV|SPO11|RECQL|DYNC1LI1|CIT|RIPK4|KIFC1|SETX|RNASEL|APAF1|MCM2
bicellular tight junction	Gene Ontology	GO:0005923	5	122	0.000171797	0.020803	ASH1L|SYMPK|CDH5|MPDZ|PATJ
cytoskeleton	Gene Ontology	GO:0005856	8	406	0.000296218	0.0321026	TMOD4|WASF3|SYMPK|CIT|PPP1R12B|SSH1|PSTPIP1|FGD4
membrane	Gene Ontology	GO:0016020	20	2075	0.000313313	0.0321026	PITPNM1|HERPUD1|GGCX|AGK|BCL2L10|SCCPDH|MPP6|APPL2|RECQL|DYNC1LI1|ARFGEF2|CIT|RIPK4|EXOC6|PSTPIP1|KIFC1|CDH5|NUP205|TMEM86B|PCNT
uterus morphogenesis	Gene Ontology	GO:0061038	2	6	0.000445901	0.0424243	STRA6|ASH1L

## Sheet: Tables10
Table.S10 Untargeted metabolome data from camel serum
ID	name	mz	rt	exact_mass	ppm	formula	precursor_type	class	sub_class	KEGG	KEGG_Pathway	CAS	hmdb	library	level	posneg	camel-1	camel-2	camel-3	camel-4
M115T43_2	L-Prolinamide	115.087	43.1	114.079	1.94636	C5H10N2O	[M+H]+	Azacyclic compounds	Amines	C19781		7531-52-4		MetaDNA	2	pos	7.11099e+06	5.38649e+06	6.60771e+06	4.43318e+06
M337T66	Kyotorphin	337.17	65.7	337.175	16.0154	C15H23N5O4	[M]+	Benzene and substituted derivatives	1-hydroxy-2-unsubstituted benzenoids	C02993		70904-56-2	HMDB0005768	MetaDNA	2	pos	1.94357e+06	927876	4.37455e+06	1.04243e+06
M321T402_2	5,6-EET	321.24	401.6	320.235	7.08499	C20H32O3	[M+H]+	Carboxylic acids and derivatives	Carbonyl compounds	C14768	Circulatory system; Nervous system; Sensory system; Endocrine system; Lipid metabolism; Global and overview maps	81246-84-6/NA	HMDB0002190	MetaDNA	2	pos	1.98653e+06	6.18836e+06	2.5364e+06	6.28922e+06
M299T450	9,10-Dihydroxystearate	299.259	449.6	316.261	15.4852	C18H36O4	[M+H-H2O]+			C19622	Lipid metabolism			MetaDNA	2	pos	7.9104e+06	1.24389e+06	1.44875e+07	1.42726e+07
M102T331	Isovaleric acid	102.034	331.2	102.068	4.85883	C5H10O2	[M]+	Fatty Acyls	Fatty acids and conjugates	C08262	Chemical structure transformation maps; Global and overview maps; Digestive system	503-74-2	HMDB0000718	BioDeepDB	2	pos	6.83538e+07	3.3848e+07	2.26218e+07	2.88969e+07
M104T688	Dimethylglycine	104.107	688.4	103.063	16.186	C4H9NO2	[M+H]+	Carboxylic acids and derivatives	Amino acids, peptides, and analogues	C01026	Amino acid metabolism; Global and overview maps	1118-68-9	HMDB0000092	BioDeepDB	2	pos	2.91113e+07	1.17411e+08	1.34085e+07	8.45894e+07
M110T36_2	Catechol	110.019	36.4	110.037	8.84574	C6H6O2	[M]+			C00090	Xenobiotics biodegradation and metabolism; Global and overview maps	120-80-9 / 12385-08-9		BioDeepDB	2	pos	1.25747e+08	4.45468e+07	6.65776e+07	1.27745e+08
M111T33	Hydroquinone	111.02	32.5	110.037	7.2763	C6H6O2	[M+H]+	Phenols	Benzenediols	C00530	Amino acid metabolism; Xenobiotics biodegradation and metabolism; Global and overview maps	123-31-9	HMDB0002434	BioDeepDB	2	pos	9.07177e+07	8.02555e+07	9.92358e+07	7.74327e+07
M111T677	Pyrrole-2-carboxylic acid	111.02	676.9	111.032	1.43412	C5H5NO2	[M]+	Pyrroles	Pyrrole carboxylic acids and derivatives	C05942	Amino acid metabolism	634-97-9	HMDB0004230	BioDeepDB	2	pos	1.58204e+07	3.27625e+07	1.7848e+07	1.33222e+08
M130T239	Ketoleucine	130.065	239.4	130.063	16.9146	C6H10O3	[M]+	Keto acids and derivatives	Short-chain keto acids and derivatives	C00233	Amino acid metabolism; Biosynthesis of other secondary metabolites; Global and overview maps	816-66-0	HMDB0000695	BioDeepDB	2	pos	3.63652e+06	1.36562e+06	3.99506e+06	2.31448e+06
M114T399	Creatinine	114.065	399.2	113.059	10.3099	C4H7N3O	[M+H]+	Carboxylic acids and derivatives	Amino acids, peptides, and analogues	C00791	Amino acid metabolism; Global and overview maps	60-27-5	HMDB0000562	BioDeepDB	2	pos	1.403e+08	1.79517e+08	5.33172e+07	1.46586e+08
M116T72_1	L-Proline	116.071	72.4	115.063	0.00458647	C5H9NO2	[M+H]+	Carboxylic acids and derivatives	Amino acids, peptides, and analogues	C00148	Cancer: overview; Membrane transport; Digestive system; Biosynthesis of other secondary metabolites; Translation; Amino acid metabolism; Global and overview maps	147-85-3	HMDB0000162	BioDeepDB	2	pos	2.02417e+07	6.81955e+07	6.48328e+07	1.86587e+07
M118T102	Indole	118.065	101.9	117.058	1.05027	C8H7N	[M+H]+	Indoles and derivatives	Indoles	C00463	Amino acid metabolism; Biosynthesis of other secondary metabolites; Global and overview maps; Digestive system	120-72-9	HMDB0000738	BioDeepDB	2	pos	4.05316e+06	2.57407e+06	3.71608e+06	3.03842e+06
M118T116	L-Valine	118.086	116.4	117.079	0.846838	C5H11NO2	[M+H]+	Carboxylic acids and derivatives	Amino acids, peptides, and analogues	C00183	Cancer: overview; Metabolism of cofactors and vitamins; Metabolism of other amino acids; Membrane transport; Digestive system; Biosynthesis of other secondary metabolites; Translation; Amino acid metabolism; Chemical structure transformation maps; Global and overview maps	72-18-4	HMDB0000883	BioDeepDB	2	pos	4.70157e+07	4.32731e+07	7.582e+07	2.232e+08
M121T102	Phenylethylamine	121.084	101.6	121.089	0.165739	C8H11N	[M]+	Benzene and substituted derivatives	Phenethylamines	C05332	Amino acid metabolism; Global and overview maps	64-04-0	HMDB0012275	BioDeepDB	2	pos	1.06775e+08	7.28377e+07	9.20572e+07	6.73979e+07
M124T687	Nicotinic acid	124.086	686.7	123.032	6.93597	C6H5NO2	[M+H]+	Pyridines and derivatives	Pyridinecarboxylic acids and derivatives	C00253	Metabolism of cofactors and vitamins; Biosynthesis of other secondary metabolites; Infectious disease: bacterial; Chemical structure transformation maps; Global and overview maps	59-67-6	HMDB0001488	BioDeepDB	2	pos	2.13084e+08	5.81958e+08	9.96523e+07	6.82677e+08
M130T55	Pipecolic acid	130.05	54.6	129.079	19.5057	C6H11NO2	[M+H]+	Carboxylic acids and derivatives	Amino acids, peptides, and analogues	C00408	Chemical structure transformation maps; Amino acid metabolism; Biosynthesis of other secondary metabolites; Global and overview maps	535-75-1 / 3105-95-1	HMDB0000070	BioDeepDB	2	pos	8.30648e+07	7.82547e+07	5.25253e+07	6.73806e+07
M149T102	Nornicotine	149.06	101.9	148.1	1.65425	C9H12N2	[M+H]+	Pyridines and derivatives	Pyrrolidinylpyridines	C06524	Biosynthesis of other secondary metabolites	494-97-3	HMDB0001126	BioDeepDB	2	pos	4.76895e+07	3.21317e+07	4.06403e+07	2.90112e+07
M132T465	Glutaric acid	132.101	465	132.042	9.13426	C5H8O4	[M]+	Carboxylic acids and derivatives	Dicarboxylic acids and derivatives	C00489	Lipid metabolism; Amino acid metabolism; Global and overview maps	110-94-1	HMDB0000661	BioDeepDB	2	pos	6.12084e+07	7.66528e+07	2.09297e+07	6.04214e+07
M132T73	L-Leucine	132.102	73.4	131.095	0.181678	C6H13NO2	[M+H]+	Carboxylic acids and derivatives	Amino acids, peptides, and analogues	C00123	Membrane transport; Signal transduction; Digestive system; Biosynthesis of other secondary metabolites; Translation; Amino acid metabolism; Chemical structure transformation maps; Global and overview maps	61-90-5	HMDB0000687	BioDeepDB	2	pos	5.726e+09	2.44162e+09	2.47337e+09	2.42814e+09
M132T85_2	cis-4-Hydroxy-D-proline	132.065	84.5	131.058	1.33267	C5H9NO3	[M+H]+	Carboxylic acids and derivatives	Amino acids, peptides, and analogues	C03440	Amino acid metabolism; Global and overview maps	2584-71-6	HMDB0060460	BioDeepDB	2	pos	4.78062e+06	4.81563e+08	6.28122e+08	1.25396e+07
M142T38	O-Phosphoethanolamine	141.96	37.8	141.019	10.8799	C2H8NO4P	[M+H]+	Organic phosphoric acids and derivatives	Phosphate esters	C00346	Lipid metabolism; Signal transduction; Global and overview maps; Drug resistance: antimicrobial	1071-23-4	HMDB0000224	BioDeepDB	2	pos	1.66726e+08	2.12357e+08	2.1252e+08	2.50857e+08
M162T49	L-Carnitine	162.112	49.4	161.105	1.53582	C7H15NO3	[M+H]+	Organonitrogen compounds	Quaternary ammonium salts	C00318	Environmental adaptation; Digestive system	541-15-1	HMDB0000062	BioDeepDB	2	pos	1.70296e+08	7.84412e+07	2.61795e+08	5.74353e+07
M145T650	Anabasine	144.983	650.1	162.116	1.97659	C10H14N2	[M+H-H2O]+			C06180	Chemical structure transformation maps; Biosynthesis of other secondary metabolites; Global and overview maps	13078-04-1 / 494-52-0	HMDB0004350	BioDeepDB	2	pos	6.05967e+07	1.78284e+07	7.24548e+07	2.60791e+07
M145T562	3-Hydroxymethylglutaric acid	144.983	561.8	162.053	2.54981	C6H10O5	[M+H-H2O]+	Fatty Acyls	Fatty acids and conjugates	C03761		503-49-1	HMDB0000355	BioDeepDB	2	pos	5.25857e+06	1.67616e+07	4.54181e+07	7.58257e+06
M147T636	4-Hydroxycinnamic acid	146.981	636.1	164.047	3.32706	C9H8O3	[M+H-H2O]+	Cinnamic acids and derivatives	Hydroxycinnamic acids and derivatives	C00811	Metabolism of cofactors and vitamins; Biosynthesis of other secondary metabolites; Amino acid metabolism; Chemical structure transformation maps; Global and overview maps	7400-08-0 / 7400-08-0 501-98-4 / 501-98-4	HMDB0002035	BioDeepDB	2	pos	4.27373e+06	4.33941e+07	2.41078e+07	8.44287e+07
M147T43	L-Lysine	147.113	43.1	146.106	0.16314	C6H14N2O2	[M+H]+	Carboxylic acids and derivatives	Amino acids, peptides, and analogues	C00047	Metabolism of cofactors and vitamins; Digestive system; Biosynthesis of other secondary metabolites; Translation; Amino acid metabolism; Chemical structure transformation maps; Global and overview maps	56-87-1	HMDB0000182	BioDeepDB	2	pos	1.35641e+08	1.01597e+08	5.8685e+07	9.2351e+07
M155T35	2,3-Butanediol	154.989	35.3	154.012	7.60382	C4H10O2S2	[M+H]+	Organooxygen compounds	Alcohols and polyols	C00265		513-85-9 / 3483-12-3	HMDB0003156	BioDeepDB	2	pos	6.30862e+07	6.86184e+07	8.91571e+07	6.45169e+07
M159T339	4,5-Dihydroorotic acid	158.959	339.3	158.033	16.4329	C5H6N2O4	[M+H]+	Carboxylic acids and derivatives	Amino acids, peptides, and analogues	C00337	Global and overview maps; Nucleotide metabolism	155-54-4 / 5988-19-2	HMDB0000528	BioDeepDB	2	pos	2.02075e+07	1.69307e+07	6.86756e+07	4.77579e+07
M177T96	N-Formyl-L-methionine	176.97	96.2	177.046	11.2636	C6H11NO3S	[M]+	Carboxylic acids and derivatives	Amino acids, peptides, and analogues	C03145	Amino acid metabolism	4289-98-9	HMDB0001015	BioDeepDB	2	pos	7.72607e+07	7.62362e+07	6.28457e+07	2.91311e+06
M168T180	L-4-Hydroxyphenylglycine	168.066	180.3	167.058	0.0146718	C8H9NO3	[M+H]+			C12323	Biosynthesis of other secondary metabolites; Global and overview maps; Metabolism of terpenoids and polyketides	32462-30-9		BioDeepDB	2	pos	850197	1.12631e+06	1.06037e+06	960381
M172T97	3-Dehydroshikimate	171.994	96.8	172.037	4.68835	C7H8O5	[M]+			C02637	Chemical structure transformation maps; Amino acid metabolism; Global and overview maps; Metabolism of terpenoids and polyketides	2922-42-1		BioDeepDB	2	pos	1.86015e+07	1.51632e+07	9.61352e+07	2.07259e+07
M175T63_1	L-Arginine	174.953	62.9	174.112	5.09009	C6H14N4O2	[M+H]+	Carboxylic acids and derivatives	Amino acids, peptides, and analogues	C00062	Cancer: overview; Membrane transport; Neurodegenerative disease; Biosynthesis of other secondary metabolites; Translation; Amino acid metabolism; Chemical structure transformation maps; Infectious disease: parasitic; Global and overview maps	74-79-3	HMDB0000517	BioDeepDB	2	pos	1.08598e+07	8.5015e+06	1.1134e+07	1.42772e+07
M183T37	Sorbitol	182.985	36.7	182.079	1.66323	C6H14O6	[M+H]+	Organooxygen compounds	Carbohydrates and carbohydrate conjugates	C00794	Carbohydrate metabolism; Membrane transport; Global and overview maps	50-70-4	HMDB0000247	BioDeepDB	2	pos	4.40784e+07	1.30231e+08	1.46866e+08	1.38314e+08
M183T166	Mannitol	183.1	165.6	182.079	9.9645	C6H14O6	[M+H]+	Organooxygen compounds	Carbohydrates and carbohydrate conjugates	C00392	Carbohydrate metabolism; Membrane transport; Global and overview maps	69-65-8	HMDB0000765	BioDeepDB	2	pos	1.6355e+06	1.12481e+07	561727	4.16131e+06
M200T30	Dodecanoic acid	199.99	30.5	200.178	10.5837	C12H24O2	[M]+	Fatty Acyls	Fatty acids and conjugates	C02679	Lipid metabolism; Biosynthesis of other secondary metabolites; Global and overview maps	143-07-7	HMDB0000638	BioDeepDB	2	pos	1.37065e+07	1.64597e+07	1.41795e+07	3.14228e+07
M184T114	3,4-Dihydroxymandelic acid	184.17	114.2	184.037	1.32433	C8H8O5	[M]+			C05580	Amino acid metabolism; Global and overview maps	14883-87-5	HMDB0001866	BioDeepDB	2	pos	1.06973e+07	9.95452e+06	1.40021e+07	1.59057e+07
M188T373	N-Alpha-acetyllysine	188.071	372.5	188.116	1.94796	C8H16N2O3	[M]+	Carboxylic acids and derivatives	Amino acids, peptides, and analogues	C12989		1946-82-3	HMDB0000446	BioDeepDB	2	pos	8.06156e+06	1.36999e+07	2.02557e+07	7.60497e+06
M219T267	N-Acetylserotonin	219.113	267.3	218.106	0.302066	C12H14N2O2	[M+H]+	Indoles and derivatives	Hydroxyindoles	C00978	Amino acid metabolism; Global and overview maps	1210-83-9	HMDB0001238	BioDeepDB	2	pos	6.0105e+06	4.37752e+06	2.31161e+06	3.95985e+06
M228T447	Deoxyuridine	228.195	447.2	228.075	1.33364	C9H12N2O5	[M]+	Pyrimidine nucleosides	Pyrimidine 2'-deoxyribonucleosides	C00526	Membrane transport; Global and overview maps; Nucleotide metabolism	951-78-0	HMDB0000012	BioDeepDB	2	pos	7.82829e+06	2.67218e+07	2.72025e+07	7.80936e+06
M224T258	Hydroxykynurenine	224.13	258.2	224.08	5.44043	C10H12N2O4	[M]+	Organooxygen compounds	Carbonyl compounds	C02794		484-78-6 / 2147-61-7	HMDB0000732	BioDeepDB	2	pos	4.04704e+07	3.16926e+07	5.45953e+07	5.15485e+07
M243T216	1-Hexadecanol	243.183	216.5	242.261	1.40722	C16H34O	[M+H]+	Fatty Acyls	Fatty alcohols	C00823	Lipid metabolism	36653-82-4	HMDB0003424	BioDeepDB	2	pos	3.767e+07	7.87643e+06	2.62107e+07	3.36106e+07
M243T314	Lumichrome	243.087	314.2	242.08	1.13539	C12H10N4O2	[M+H]+			C01727	Metabolism of cofactors and vitamins	1086-80-2		BioDeepDB	2	pos	5.94185e+06	6.03489e+06	7.20104e+06	5.11255e+06
M282T522	Oleic acid	282.279	522.3	282.256	0.278604	C18H34O2	[M]+	Fatty Acyls	Fatty acids and conjugates	C00712	Lipid metabolism; Chemical structure transformation maps; Aging	112-80-1	HMDB0000207	BioDeepDB	2	pos	1.95586e+07	2.89858e+07	2.56904e+07	2.06377e+07
M282T622	(6Z)-Octadecenoic acid	282.279	622.3	282.256	0.450263	C18H34O2	[M]+			C08363		593-39-5		BioDeepDB	2	pos	4.60739e+08	8.21134e+08	7.11407e+08	9.01208e+08
M281T450	1-Methyladenosine	281.248	449.6	281.112	1.13193	C11H15N5O4	[M]+	Purine nucleosides		C02494		15763-06-1	HMDB0003331	BioDeepDB	2	pos	4.5169e+06	763780	4.57294e+06	5.22861e+06
M312T533	Aflatoxin B1	312.362	533.3	312.063	1.00633	C17H12O6	[M]+	Coumarins and derivatives	Furanocoumarins	C06800	Biosynthesis of other secondary metabolites; Global and overview maps; Xenobiotics biodegradation and metabolism; Cancer: specific types	1162-65-8	HMDB0006552	BioDeepDB	2	pos	1.58928e+07	1.88568e+07	5.12507e+08	2.07053e+07
M338T634_1	Erucic acid	338.34	633.8	338.318	1.40687	C22H42O2	[M-H2O+NH4]+	Fatty Acyls	Fatty acids and conjugates	C08316	Lipid metabolism	112-86-7	HMDB0002068	BioDeepDB	2	pos	5.84177e+08	6.12636e+08	1.03993e+09	9.93441e+08
M363T45_1	GMP	362.922	45.4	363.058	12.0916	C10H14N5O8P	[M]+	Purine nucleotides	Purine ribonucleotides	C00144	Drug resistance: antineoplastic; Signal transduction; Sensory system; Nucleotide metabolism; Chemical structure transformation maps; Global and overview maps	85-32-5	HMDB0001397	BioDeepDB	2	pos	2.30913e+08	5.38072e+07	3.51435e+08	2.25512e+08
M430T656	alpha-Tocopherol	430.382	655.5	430.381	2.78822	C29H50O2	[M]+	Prenol lipids	Quinone and hydroquinone lipids	C02477	Metabolism of cofactors and vitamins; Cell growth and death; Digestive system; Chemical structure transformation maps; Global and overview maps	59-02-9	HMDB0001893	BioDeepDB	2	pos	1.49656e+08	1.06492e+08	1.43535e+08	48611.4
M778T369_2	Thyroxine	777.693	368.7	776.687	0.612066	C15H11I4NO4	[M+H]+	Carboxylic acids and derivatives	Amino acids, peptides, and analogues	C01829	Digestive system; Endocrine system; Signaling molecules and interaction; Amino acid metabolism; Immune disease; Global and overview maps	51-48-9	HMDB0000248	BioDeepDB	2	pos	2.02042e+07	1.62613e+07	4.1692e+06	2.87084e+07
M104T48	Choline	104.107	48	104.108	0.639392	C5H14NO	[M+H]+	Organonitrogen compounds	Quaternary ammonium salts	C00114	Cancer: overview; Membrane transport; Nervous system; Digestive system; Lipid metabolism; Amino acid metabolism; Global and overview maps	62-49-7	HMDB0000097	BioDeepDB	2	pos	8.78246e+07	6.21052e+07	7.08435e+07	5.5818e+07
M118T374	Betaine	118.085	374.2	117.079	9.69752	C5H11NO2	[M+H]+	Carboxylic acids and derivatives	Amino acids, peptides, and analogues	C00719	Amino acid metabolism; Membrane transport; Global and overview maps	107-43-7/590-46-5	HMDB0000043	BioDeepDB	2	pos	3.40412e+07	1.18217e+08	9.55011e+07	8.30194e+07
M124T570	L-Histidinol	124.086	569.6	141.09	27.6743	C6H11N3O	[M+H-H2O]+	Organonitrogen compounds	Amines	C00860	Amino acid metabolism; Global and overview maps	4836-52-6	HMDB0003431	BioDeepDB	2	pos	1.52628e+08	1.05143e+08	9.92477e+07	2.95531e+08
M151T245	(+)-(S)-Carvone	151.112	244.8	150.105	0.158823	C10H14O	[M+H]+	Prenol lipids	Monoterpenoids	C11383	Global and overview maps; Metabolism of terpenoids and polyketides	2244-16-8	HMDB0004487	BioDeepDB	2	pos	2.04168e+06	7.22707e+06	3.1859e+06	4.34774e+06
M170T487	Diphenylamine	170.097	486.8	169.089	1.7637	C12H11N	[M+H]+	Benzene and substituted derivatives	Anilines	C11016		122-39-4	HMDB0032562	BioDeepDB	2	pos	1.02959e+07	8.31212e+06	1.15908e+07	1.159e+07
M170T44	1-Methylhistidine	170.093	44.2	169.085	1.76374	C7H11N3O2	[M+H]+	Carboxylic acids and derivatives	Amino acids, peptides, and analogues	C01152	Amino acid metabolism; Global and overview maps	332-80-9/368-16-1	HMDB0000001	BioDeepDB	2	pos	1.45517e+08	1.31192e+08	1.44178e+08	1.40547e+08
M184T74	4-Pyridoxic acid	184.061	74	183.053	0.673691	C8H9NO4	[M+H]+	Pyridines and derivatives	Pyridinecarboxylic acids and derivatives	C00847	Metabolism of cofactors and vitamins; Global and overview maps	82-82-6	HMDB0000017	BioDeepDB	2	pos	4.77233e+06	7.46868e+06	7.1157e+06	5.86988e+06
M184T516	Phosphorylcholine	184.075	515.8	184.074	5.97583	C5H15NO4P	[M]+	Organonitrogen compounds	Quaternary ammonium salts	C00588	Lipid metabolism; Cancer: overview; Global and overview maps	3616-04-4/107-73-3	HMDB0001565	BioDeepDB	2	pos	4.46515e+07	4.79641e+07	5.37311e+07	2.77721e+07
M300T453	Sphingosine	300.29	453	299.282	0.999034	C18H37NO2	[M+H]+	Organonitrogen compounds	Amines	C00319	Lipid metabolism; Cell growth and death; Signal transduction; Global and overview maps	123-78-4	HMDB0000252	BioDeepDB	2	pos	7.26781e+06	9.3801e+06	7.45845e+06	8.20861e+06
M300T591	Palmitoylethanolamide	300.291	590.6	299.282	3.33011	C18H37NO2	[M+H]+	Carboximidic acids and derivatives	Carboximidic acids	C16512	Signaling molecules and interaction	544-31-0	HMDB0002100	BioDeepDB	2	pos	8.65181e+06	1.09608e+07	1.08345e+07	1.39041e+07
M316T385	Decanoyl-L-carnitine	316.248	384.7	315.241	0.0283356	C17H33NO4	[M+H]+			C03299		3992-45-8	HMDB00651	BioDeepDB	2	pos	2.3523e+07	8.7983e+06	1.50118e+07	8.79812e+06
M496T511_2	1-palmitoylglycerophosphocholine	496.343	511.1	496.34	5.23831	C24H51NO7P	[M]+	Glycerophospholipids	Glycerophosphocholines	C04102		17364-16-8	HMDB0062541	BioDeepDB	2	pos	1.11732e+10	8.98451e+09	9.11085e+09	9.70278e+09
M269T72	Inosine	269.087	72	268.081	3.14204	C10H12N4O5	[M+H]+	Purine nucleosides		C00294	Membrane transport; Global and overview maps; Nucleotide metabolism	58-63-9	HMDB0000195	MoNA	2	pos	1.56661e+07	8.55564e+06	4.5438e+06	5.47807e+06
M132T140	Leucine	132.102	140.2	131.095	0.938669	C6H13NO2	[M+H]+	Carboxylic acids and derivatives	Amino acids, peptides, and analogues	C16439		328-39-2	HMDB0062203	BioDeepDB	2	pos	2.15273e+07	3.41255e+06	3.92698e+06	1.09105e+07
M133T43	Ornithine	133.097	43.1	132.09	0.571012	C5H12N2O2	[M+H]+	Carboxylic acids and derivatives	Amino acids, peptides, and analogues	C00077	Membrane transport; Metabolism of other amino acids; Biosynthesis of other secondary metabolites; Amino acid metabolism; Chemical structure transformation maps; Global and overview maps	3184-13-2/70-26-8	HMDB0000214	BioDeepDB	2	pos	2.51491e+07	1.62057e+07	2.34349e+07	1.93477e+07
M204T54_1	O-Acetylcarnitine	204.123	53.7	204.124	1.9596	C9H18NO4	[M]+			C02571	Endocrine and metabolic disease	5080-50-2		BioDeepDB	2	pos	1.69797e+07	3.28179e+07	3.93329e+07	1.64603e+07
M130T267	Isoquinoline	130.065	266.8	129.058	2.49105	C9H7N	[M+H]+	Isoquinolines and derivatives		C06323		119-65-3	HMDB0034244	mzCloud	2	pos	1.51504e+07	2.35492e+07	1.40566e+07	2.26597e+07
M146T42_2	L-Glutamine	146.081	42.5	146.069	0.00242334	C5H10N2O3	[M]+	Carboxylic acids and derivatives	Amino acids, peptides, and analogues	C00064	Cancer: overview; Metabolism of cofactors and vitamins; Chemical structure transformation maps; Membrane transport; Nervous system; Excretory system; Digestive system; Carbohydrate metabolism; Nucleotide metabolism; Translation; Amino acid metabolism; Energy metabolism; Global and overview maps	5959-95-5	HMDB0003423	BioDeepDB	2	pos	6.04563e+06	8.72744e+06	6.60399e+06	6.07424e+06
M218T78	Propionylcarnitine	218.138	78.3	217.131	2.64053	C10H19NO4	[M+H]+	Fatty Acyls	Fatty acid esters	C03017		17298-37-2	HMDB0000824	MoNA	2	pos	6.31394e+07	1.63084e+08	1.36251e+08	1.10593e+08
M196T290	Salicyluric acid	196.061	289.9	195.053	0.632458	C9H9NO4	[M+H]+	Benzene and substituted derivatives	Benzoic acids and derivatives	C07588		487-54-7	HMDB0000840	mzCloud	2	pos	1.17804e+07	1.50005e+07	1.0858e+07	7.65362e+06
M298T671	Tridemorph	298.31	670.9	297.303	1.59566	C19H39NO	[M+H]+	Oxazinanes	Morpholines	C11285		c("24602-86-6", "81412-43-3", "NA")	HMDB0031810	mzCloud	2	pos	1.46026e+07	2.25493e+07	2.77442e+07	3.5734e+07
M102T353	(S)-Methylmalonic acid semialdehyde	102.034	353.3	102.032	5.96596	C4H6O3	[M]+	Organooxygen compounds	Carbonyl compounds	C06002	Carbohydrate metabolism; Amino acid metabolism; Xenobiotics biodegradation and metabolism; Global and overview maps	99043-16-0	HMDB0002217	BioDeepDB	2	pos	2.31818e+07	2.4931e+07	6.96982e+06	1.57465e+07
M102T376	2-Methyl-3-oxopropanoic acid	102.034	376.1	102.032	0.789602	C4H6O3	[M]+	Organooxygen compounds	Carbonyl compounds	C00349	Amino acid metabolism	6236-08-4	HMDB0001172	BioDeepDB	2	pos	3.58972e+06	4.30646e+06	5.19805e+06	2.08363e+07
M114T55	1-Pyrroline-2-carboxylic acid	114.055	54.6	113.048	0.220071	C5H7NO2	[M+H]+	Pyrrolines		C03564	Amino acid metabolism	2139-03-9	HMDB0006875	BioDeepDB	2	pos	6.13542e+06	5.78141e+06	5.71017e+06	4.47078e+06
M114T114	Epsilon-caprolactam	114.092	114.5	113.084	0.491571	C6H11NO	[M+H]+	Lactams	Caprolactams	C06593	Xenobiotics biodegradation and metabolism; Global and overview maps	105-60-2	HMDB0062769	BioDeepDB	2	pos	7.50787e+06	9.34169e+06	1.10061e+07	6.35567e+06
M115T70	N-Methylhydantoin	115.05	70.1	114.043	0.00190983	C4H6N2O2	[M+H]+	Azolines	Imidazolines	C02565	Amino acid metabolism; Global and overview maps	616-04-6	HMDB0003646	BioDeepDB	2	pos	1.6628e+06	2.60755e+06	2.54094e+06	1.79198e+06
M121T51	(S)-2-Phenyloxirane	121.072	51.4	120.058	22.1997	C8H8O	[M+H]+			C20782	Xenobiotics biodegradation and metabolism; Global and overview maps	20780-54-5		BioDeepDB	2	pos	1.32846e+07	7.2542e+06	1.38571e+07	6.62322e+06
M127T37	1,2,3-Trihydroxybenzene	127.04	37.5	126.032	8.87967	C6H6O3	[M+H]+	Benzene and substituted derivatives	Phenols and derivatives	C01108	Xenobiotics biodegradation and metabolism; Global and overview maps; Target-based classification: Enzymes	87-66-1	HMDB0013674	BioDeepDB	2	pos	2.34426e+07	6.89701e+07	2.66118e+07	6.42739e+07
M127T88	Thymine	127.05	88.1	126.043	0.00172945	C5H6N2O2	[M+H]+	Diazines	Pyrimidines and pyrimidine derivatives	C00178	Global and overview maps; Nucleotide metabolism	65-71-4	HMDB0000262	BioDeepDB	2	pos	1.06804e+07	2.69063e+07	1.69756e+07	1.45927e+07
M130T358	2-Ketohexanoic acid	130.065	358	130.063	0.0187707	C6H10O3	[M]+	Keto acids and derivatives	Medium-chain keto acids and derivatives	C00902		2492-75-3	HMDB0001864	BioDeepDB	2	pos	2.17501e+07	3.22049e+07	3.44314e+07	5.22752e+07
M131T358	5-Amino-2-oxopentanoic acid	131.069	357.9	131.058	14.1157	C5H9NO3	[M]+	Keto acids and derivatives	Short-chain keto acids and derivatives	C01110	Amino acid metabolism; Global and overview maps		HMDB0006272	BioDeepDB	2	pos	1.50563e+06	2.6723e+06	2.84381e+06	4.23867e+06
M132T628	Beta-Leucine	132.103	627.5	131.095	1.39997	C6H13NO2	[M+H]+	Carboxylic acids and derivatives	Amino acids, peptides, and analogues	C02486		5699-54-7	HMDB0003640	BioDeepDB	2	pos	1.71782e+08	3.79275e+07	1.3417e+08	6.03141e+07
M132T521	Aminocaproic acid	132.101	521.4	131.095	5.08103	C6H13NO2	[M+H]+	Fatty Acyls	Fatty acids and conjugates	C02378	Xenobiotics biodegradation and metabolism; Global and overview maps	60-32-2 / 1319-82-0	HMDB0001901	BioDeepDB	2	pos	1.81955e+07	1.04231e+08	2.18432e+07	3.53495e+07
M134T252	1,3-Dihydro-(2H)-indol-2-one	134.06	251.8	133.053	0.0185506	C8H7NO	[M+H]+	Indoles and derivatives	Indolines	C12312	Biosynthesis of other secondary metabolites; Global and overview maps	59-48-3	HMDB0061918	BioDeepDB	2	pos	6.69341e+06	1.00318e+07	7.59282e+06	7.96804e+06
M155T192	Imidazol-5-yl-pyruvate	155.045	191.6	154.038	0.799767	C6H6N2O3	[M+H]+			C03277	Amino acid metabolism; Global and overview maps			BioDeepDB	2	pos	2.54134e+07	2.31599e+07	2.92077e+07	2.55632e+07
M140T30	Acetylphosphate	139.982	30.3	139.988	1.86415	C2H5O5P	[M]+	Organic phosphoric acids and derivatives	Phosphate esters	C00227	Carbohydrate metabolism; Energy metabolism; Metabolism of other amino acids; Global and overview maps	590-54-5	HMDB0001494	BioDeepDB	2	pos	7.57776e+07	6.8384e+07	6.66515e+07	6.78573e+07
M145T72	4-Oxoglutaramate	145.05	72.1	145.037	0.45232	C5H7NO4	[M]+			C05572	Amino acid metabolism			BioDeepDB	2	pos	1.54588e+08	1.5157e+08	1.63709e+08	4.15659e+07
M146T186	8-Hydroxyquinoline	146.06	185.9	145.053	0.0463566	C9H7NO	[M+H]+			C19434		148-24-3		BioDeepDB	2	pos	4.904e+07	2.50065e+07	3.28283e+07	3.48031e+07
M162T222	2-Hydroxyadipic acid	162.055	221.8	162.053	13.5756	C6H10O5	[M]+	Fatty Acyls	Fatty acids and conjugates	C02360		18294-85-4	HMDB0000321	BioDeepDB	2	pos	5.3389e+06	6.59339e+06	3.12227e+06	7.11794e+06
M183T484	Se-Methylselenocysteine	182.987	484.2	182.98	6.13762	C4H9NO2Se	[M]+	Carboxylic acids and derivatives	Amino acids, peptides, and analogues	C05689	Metabolism of other amino acids; Global and overview maps	26046-90-2 / 2574-71-2 / NA	HMDB0004113	BioDeepDB	2	pos	9.51934e+06	8.25091e+06	4.83497e+07	2.43607e+07
M169T351	Geranic acid	169.123	351.4	168.115	1.93116	C10H16O2	[M+H]+	Prenol lipids	Monoterpenoids	C16461	Global and overview maps; Metabolism of terpenoids and polyketides	459-80-3 / 4698-08-2	HMDB0036103	BioDeepDB	2	pos	385915	3.53299e+06	3.87642e+06	7.86832e+06
M176T330	2-Isopropylmalic acid	176.07	330.1	176.069	0.308508	C7H12O5	[M]+	Fatty Acyls	Fatty acids and conjugates	C02504	Carbohydrate metabolism; Amino acid metabolism; Global and overview maps	3237-44-3	HMDB0000402	BioDeepDB	2	pos	8.36107e+06	1.63957e+07	8.54719e+06	2.01445e+07
M176T76	D-Alanyl-D-serine	176.074	76	176.08	1.55963	C6H12N2O4	[M]+			C19719	Drug resistance: antimicrobial			BioDeepDB	2	pos	1.5244e+06	928372	1.50438e+06	3.89495e+06
M181T349	L-Sorbose	181.086	348.9	180.063	1.95516	C6H12O6	[M+H]+			C00247	Carbohydrate metabolism; Global and overview maps	87-79-6		BioDeepDB	2	pos	4.04918e+06	5.22855e+06	4.99471e+06	5.10571e+06
M194T82	3,4-Methylenedioxyamphetamine	194.118	82	193.11	0.0122281	C11H15NO2	[M+H]+	Benzodioxoles		C07577		4764-17-4 / 42542-10-9	HMDB0041931	BioDeepDB	2	pos	1.07997e+07	9.14449e+06	1.99311e+07	9.54585e+06
M224T390	(2S)-Flavanone	224.092	389.6	224.084	1.78232	C15H12O2	[M]+			C02099		487-26-3		BioDeepDB	2	pos	5.38556e+06	4.63905e+06	6.28595e+06	4.57643e+06
M232T144	Butyryl-L-carnitine	232.154	144.2	231.147	3.57951e-05	C11H21NO4	[M+H]+			C02862		25576-40-3	HMDB02013	BioDeepDB	2	pos	3.42436e+07	4.26895e+07	2.8893e+07	2.61791e+07
M251T301	Abscisic alcohol	251.165	301	250.157	1.20229	C15H22O3	[M+H]+			C13456	Metabolism of terpenoids and polyketides			BioDeepDB	2	pos	5.87669e+06	2.0373e+07	6.41294e+06	1.03962e+07
M286T621	Retinol	286.229	620.8	286.23	3.84308	C20H30O	[M]+			C00473	Metabolism of cofactors and vitamins; Global and overview maps; Digestive system	68-26-8 11103-57-4 / 11103-57-4 / 68-26-8		BioDeepDB	2	pos	2.73835e+07	2.93326e+07	4.44202e+07	4.11132e+07
M315T624	9,10-DHOME	315.251	623.6	314.246	6.58523	C18H34O4	[M+H]+	Fatty Acyls	Fatty acids and conjugates	C14828	Lipid metabolism	263399-34-4	HMDB0004704	BioDeepDB	2	pos	1.39875e+07	2.08155e+07	2.90556e+07	6.26439e+07
M305T379	Arachidonic acid	305.25	379	304.24	7.1681	C20H32O2	[M+H]+	Fatty Acyls	Fatty acids and conjugates	C00219	Circulatory system; Cell growth and death; Nervous system; Sensory system; Endocrine system; Lipid metabolism; Structure-based classification; Immune system; Infectious disease: parasitic; Global and overview maps	506-32-1	HMDB0001043	BioDeepDB	2	pos	6.04915e+06	2.87659e+06	6.34583e+06	4.54166e+06
M368T374	Misoprostol	368.246	374.2	368.256	27.629	C21H36O5	[M]+			C07227		59122-46-2		BioDeepDB	2	pos	3.77365e+06	8.29624e+06	4.15026e+06	6.31392e+06
M430T393	2,22-Dideoxy-3-dehydroecdysone	430.312	392.6	430.308	9.29557	C27H42O4	[M]+			C16498	Metabolism of terpenoids and polyketides			BioDeepDB	2	pos	2.71501e+06	2.81396e+06	2.37306e+06	3.75065e+06
M414T385	14alpha-Hydroxy-5beta-cholest-7-ene-3,6-dione	414.31	385.3	414.313	6.99958	C27H42O3	[M]+			C16509	Metabolism of terpenoids and polyketides			BioDeepDB	2	pos	4.78111e+07	3.03926e+06	2.10184e+06	2.85242e+06
M417T427	Calcitriol	417.338	427.4	416.329	3.05341	C27H44O3	[M+H]+	Steroids and steroid derivatives	Vitamin D and derivatives	C01673	Excretory system; Digestive system; Endocrine system; Lipid metabolism; Infectious disease: bacterial; Global and overview maps	32222-06-3	HMDB0001903	BioDeepDB	2	pos	9.50403e+06	234757	2.99241e+06	200413
M135T76	Adenine	135.057	75.7	135.054	16.2897	C5H5N5	[M]-	Azacyclic compounds	Amines	C00147	Metabolism of terpenoids and polyketides; Global and overview maps; Nucleotide metabolism	73-24-5	HMDB0000034	MetaDNA	2	neg	7951.65	4798.85	56330.1	30794.3
M230T269	D-Ribose 5-phosphate	230.022	268.9	230.019	10.4339	C5H11O8P	[M]-	Organic oxides	Alcohols and polyols	C00117	Metabolism of cofactors and vitamins; Metabolism of other amino acids; Endocrine system; Carbohydrate metabolism; Nucleotide metabolism; Energy metabolism; Global and overview maps	3615-55-2/4300-28-1/4151-19-3/62746-84-3	HMDB0001548	MetaDNA	2	neg	727459	738837	848723	567398
M528T304_2	N-[(3a,5b,7a)-3-hydroxy-24-oxo-7-(sulfooxy)cholan-24-yl]-Glycine	528.269	304.4	529.271	10.9339	C26H43NO8S	[M-H]-	Carboxylic acids and derivatives	Alcohols and polyols	C15559		67030-55-1	HMDB0002496	MetaDNA	2	neg	3.80943e+06	1.30572e+06	1.26821e+06	1.16977e+06
M113T600	Oxalacetic acid	112.986	600.3	132.006	11.5943	C4H4O5	[M-H2O-H]-	Keto acids and derivatives	Short-chain keto acids and derivatives	C00036	Cancer: overview; Chemical structure transformation maps; Signal transduction; Carbohydrate metabolism; Xenobiotics biodegradation and metabolism; Biosynthesis of other secondary metabolites; Amino acid metabolism; Energy metabolism; Global and overview maps	328-42-7 / 149-63-3	HMDB0000223	BioDeepDB	2	neg	7.19601e+06	2.45898e+06	6.36484e+06	9.23114e+06
M115T688	Caproic acid	114.935	688	116.084	13.5344	C6H12O2	[M-H]-	Fatty Acyls	Fatty acids and conjugates	C01585		142-62-1 / 151-33-7	HMDB0000535	BioDeepDB	2	neg	1.32892e+08	5.73927e+07	2.399e+08	2.77546e+08
M117T257	5-Aminopentanoic acid	116.93	256.6	117.079	18.582	C5H11NO2	[M]-	Carboxylic acids and derivatives	Amino acids, peptides, and analogues	C00431	Amino acid metabolism; Global and overview maps	660-88-8	HMDB0003355	BioDeepDB	2	neg	6.5475e+06	4.181e+06	1.48863e+06	4.19244e+06
M117T53_1	Succinic acid	117.056	52.5	118.027	11.2778	C4H6O4	[M-H]-	Carboxylic acids and derivatives	Dicarboxylic acids and derivatives	C00042	Cancer: overview; Metabolism of cofactors and vitamins; Chemical structure transformation maps; Signal transduction; Nervous system; Endocrine system; Carbohydrate metabolism; Xenobiotics biodegradation and metabolism; Amino acid metabolism; Energy metabolism; Global and overview maps	110-15-6	HMDB0000254	BioDeepDB	2	neg	4.50711e+07	3.55993e+07	1.07216e+08	3.56549e+07
M147T387	L-2-Hydroxyglutaric acid	146.966	386.7	148.037	8.23641	C5H8O5	[M-H]-	Fatty Acyls	Fatty acids and conjugates	C03196	Amino acid metabolism; Global and overview maps	13095-48-2	HMDB0000694	BioDeepDB	2	neg	1.57335e+07	1.54329e+07	9.09883e+06	2.22061e+07
M131T84	L-Isoleucine	131.072	83.6	131.095	9.88732	C6H13NO2	[M]-	Carboxylic acids and derivatives	Amino acids, peptides, and analogues	C00407	Cancer: overview; Metabolism of other amino acids; Digestive system; Biosynthesis of other secondary metabolites; Infectious disease: bacterial; Translation; Amino acid metabolism; Chemical structure transformation maps; Global and overview maps	73-32-5	HMDB0000172	BioDeepDB	2	neg	5.80185e+06	6.74131e+06	2.9385e+06	1.86446e+06
M150T664	D-Ribose	149.994	664	150.053	2.72116	C5H10O5	[M]-	Organooxygen compounds	Carbohydrates and carbohydrate conjugates	C00121	Carbohydrate metabolism; Membrane transport; Global and overview maps; Cell motility	613-83-2 / 50-69-1	HMDB0000283	BioDeepDB	2	neg	2.92502e+07	1.44821e+07	3.34582e+07	3.26473e+07
M135T59	Phenyl acetate	134.895	58.8	136.052	11.1547	C8H8O2	[M-H]-			C00548		122-79-2		BioDeepDB	2	neg	6.26291e+07	2.70302e+07	6.10424e+07	4.71997e+07
M153T73	2-Pyrocatechuic acid	153.02	72.6	154.027	3.11071	C7H6O4	[M-H]-	Benzene and substituted derivatives	Benzoic acids and derivatives	C00196	Chemical structure transformation maps; Xenobiotics biodegradation and metabolism; Global and overview maps; Metabolism of terpenoids and polyketides	303-38-8	HMDB0000397	BioDeepDB	2	neg	3.25261e+06	5.13172e+06	8.74776e+06	2.73403e+06
M135T324_2	Hypoxanthine	135.032	323.8	136.038	2.78453	C5H4N4O	[M-H]-	Imidazopyrimidines	Purines and purine derivatives	C00262	Global and overview maps; Nucleotide metabolism	68-94-0	HMDB0000157	BioDeepDB	2	neg	5.94245e+06	1.51396e+06	1.95637e+06	6.31946e+06
M144T247	Spermidine	143.914	246.6	145.158	2.07331	C7H19N3	[M-H]-	Organonitrogen compounds	Amines	C00315	Membrane transport; Metabolism of other amino acids; Digestive system; Biosynthesis of other secondary metabolites; Metabolism of terpenoids and polyketides; Amino acid metabolism; Global and overview maps	124-20-9	HMDB0001257	BioDeepDB	2	neg	9.37103e+06	3.765e+06	1.95665e+07	1.02379e+07
M147T344	trans-Cinnamate	146.966	343.6	148.052	6.26373	C9H8O2	[M-H]-			C00423	Metabolism of cofactors and vitamins; Biosynthesis of other secondary metabolites; Amino acid metabolism; Chemical structure transformation maps; Global and overview maps	140-10-3		BioDeepDB	2	neg	3.32377e+06	4.75776e+06	1.21399e+07	3.30733e+06
M149T547	3-Methyladenine	149.01	546.6	149.07	12.6105	C6H7N5	[M]-	Imidazopyrimidines	Purines and purine derivatives	C00913		5142-23-4	HMDB0011600	BioDeepDB	2	neg	9.73436e+06	8.81567e+06	1.26682e+07	1.14692e+07
M150T677	D-Xylose	149.994	677.1	150.053	4.3978	C5H10O5	[M]-	Organooxygen compounds	Carbohydrates and carbohydrate conjugates	C00181	Carbohydrate metabolism; Membrane transport; Global and overview maps	58-86-6	HMDB0000098	BioDeepDB	2	neg	2.40087e+07	3.4231e+07	3.1679e+07	1.9456e+06
M153T236	Gentisic acid	153.02	236.2	154.027	3.11071	C7H6O4	[M-H]-	Benzene and substituted derivatives	Benzoic acids and derivatives	C00628	Amino acid metabolism; Xenobiotics biodegradation and metabolism; Global and overview maps	490-79-9	HMDB0000152	BioDeepDB	2	neg	1.53828e+08	2.33604e+08	1.83301e+08	1.89596e+08
M172T72	N-Acetylleucine	172.098	71.5	173.105	2.1848	C8H15NO3	[M-H]-	Carboxylic acids and derivatives	Amino acids, peptides, and analogues	C02710		1188-21-2	HMDB0011756	BioDeepDB	2	neg	1.31827e+07	4.14118e+06	5.61191e+06	4.50407e+06
M173T91_2	Suberic acid	173.082	91.1	174.089	2.75014	C8H14O4	[M-H]-	Fatty Acyls	Fatty acids and conjugates	C08278		505-48-6	HMDB0000893	BioDeepDB	2	neg	2.49108e+07	8.30201e+07	3.81215e+07	4.41856e+07
M165T689	Phthalic acid	165.042	689.2	166.027	8.98663	C8H6O4	[M-H]-	Benzene and substituted derivatives	Benzoic acids and derivatives	C01606	Membrane transport; Xenobiotics biodegradation and metabolism; Global and overview maps	88-99-3 / 3198-29-6	HMDB0002107	BioDeepDB	2	neg	3.07332e+06	8.3994e+07	4.39387e+07	3.9995e+07
M165T602	3-Methylxanthine	165.041	601.6	166.049	4.84384	C6H6N4O2	[M-H]-	Imidazopyrimidines	Purines and purine derivatives	C16357	Biosynthesis of other secondary metabolites; Global and overview maps	1076-22-8	HMDB0001886	MoNA	2	neg	4.6283e+07	4.82831e+07	8.34488e+06	6.13912e+06
M175T239	Guanidinosuccinic acid	174.956	238.9	175.059	6.7129	C5H9N3O4	[M]-	Carboxylic acids and derivatives	Amino acids, peptides, and analogues	C03139		6133-30-8	HMDB0003157	BioDeepDB	2	neg	2.63567e+06	4.03778e+06	8.62877e+06	2.63573e+06
M197T280	Vanillylmandelic acid	196.974	279.9	198.053	16.342	C9H10O5	[M-H]-	Phenols	Methoxyphenols	C05584	Amino acid metabolism; Global and overview maps	55-10-7	HMDB0000291	BioDeepDB	2	neg	98247.7	15850.8	90815.3	6540.63
M179T49	D-Mannose	179.056	49.5	180.063	1.54141	C6H12O6	[M-H]-	Organooxygen compounds	Carbohydrates and carbohydrate conjugates	C00159	Membrane transport; Transport and catabolism; Carbohydrate metabolism; Immune system; Global and overview maps	3458-28-4 / 3458-28-4 31103-86-3 / 530-26-7	HMDB0000169	BioDeepDB	2	neg	4.48194e+08	2.5878e+08	3.73731e+08	2.43164e+08
M194T468	Methyl beta-D-galactoside	194.082	468.4	194.079	3.057	C7H14O6	[M]-			C03619	Membrane transport	1824-94-8		BioDeepDB	2	neg	2.6399e+06	2.08815e+06	2.99381e+06	4.0596e+06
M213T555	Tridecanoic acid	213.186	554.9	214.193	0.112578	C13H26O2	[M-H]-	Fatty Acyls	Fatty acids and conjugates	C17076		638-53-9	HMDB0000910	BioDeepDB	2	neg	6.98056e+06	3.99041e+06	5.71999e+06	1.17152e+07
M223T431	Methyl jasmonate	223.134	431.1	224.141	2.13324	C13H20O3	[M-H]-	Fatty Acyls	Lineolic acids and derivatives	C11512	Lipid metabolism; Global and overview maps	1211-29-6 / 39924-52-2	HMDB0036583	BioDeepDB	2	neg	1.6896e+06	1.48928e+06	1.96703e+06	1.59921e+06
M239T45	L-Cystine	239.017	45.5	240.024	0.100411	C6H12N2O4S2	[M-H]-	Carboxylic acids and derivatives	Amino acids, peptides, and analogues	C00491	Membrane transport; Cell growth and death; Digestive system; Amino acid metabolism; Global and overview maps	56-89-3	HMDB0000192	BioDeepDB	2	neg	1.44918e+07	7.02037e+06	7.21247e+06	1.25046e+07
M223T688	Thymidine	223.027	687.7	242.09	4.44961	C10H14N2O5	[M-H2O-H]-	Pyrimidine nucleosides	Pyrimidine 2'-deoxyribonucleosides	C00214	Global and overview maps; Nucleotide metabolism	50-89-5	HMDB0000273	BioDeepDB	2	neg	7.8098e+07	7.57733e+07	6.71322e+07	6.99034e+07
M256T340	(2S)-Liquiritigenin	256.071	339.8	256.074	5.56393	C15H12O4	[M]-	Flavonoids	Flavans	C09762	Chemical structure transformation maps; Biosynthesis of other secondary metabolites; Global and overview maps	578-86-9	HMDB0029519	BioDeepDB	2	neg	1.82155e+06	1.63358e+06	1.69527e+06	1.38972e+06
M255T621	Palmitic acid	255.235	621.4	256.24	8.13368	C16H32O2	[M-H]-	Fatty Acyls	Fatty acids and conjugates	C00249	Lipid metabolism; Chemical structure transformation maps; Global and overview maps	57-10-3	HMDB0000220	BioDeepDB	2	neg	3.93508e+07	4.71801e+07	1.24455e+07	3.61554e+07
M283T599	Guanosine	283.271	598.7	283.092	26.2198	C10H13N5O5	[M]-	Purine nucleosides		C00387	Membrane transport; Global and overview maps; Nucleotide metabolism	118-00-3	HMDB0000133	BioDeepDB	2	neg	1.74167e+07	1.40081e+07	3.50537e+07	2.07629e+07
M283T593	Stearic acid	283.258	593.1	284.272	20.5607	C18H36O2	[M-H]-	Fatty Acyls	Fatty acids and conjugates	C01530	Lipid metabolism; Chemical structure transformation maps; Sensory system	57-11-4/646-29-7	HMDB0000827	MoNA	2	neg	3.50893e+07	1.20478e+08	6.77107e+07	1.52835e+08
M277T583	Alpha-Linolenic acid	277.217	582.9	278.225	0.634881	C18H30O2	[M-H]-	Fatty Acyls	Lineolic acids and derivatives	C06427	Lipid metabolism; Chemical structure transformation maps; Global and overview maps	463-40-1	HMDB0001388	BioDeepDB	2	neg	9.35517e+07	1.68108e+08	2.47591e+08	5.0752e+08
M299T599	Kaempferide	299.259	598.8	300.063	1.27121	C16H12O6	[M-H]-	Flavonoids	O-methylated flavonoids	C10098	Biosynthesis of other secondary metabolites	491-54-3	HMDB0037441	BioDeepDB	2	neg	1.33343e+07	8.45491e+06	1.38445e+07	1.62305e+07
M297T568	Nonadecanoic acid	297.244	567.8	298.287	2.25706	C19H38O2	[M-H]-	Fatty Acyls	Fatty acids and conjugates	C16535		646-30-0	HMDB0000772	BioDeepDB	2	neg	3.08071e+07	7.93693e+06	4.71469e+07	3.61927e+07
M407T318_2	Allocholic acid	407.279	318.4	408.288	1.90503	C24H40O5	[M-H]-	Steroids and steroid derivatives	Bile acids, alcohols and derivatives	C00695	Lipid metabolism; Global and overview maps; Digestive system	2464-18-8 / 81-25-4	HMDB0000505	BioDeepDB	2	neg	319384	127359	273311	63756
M391T487	Deoxycholic acid	391.251	487	392.293	3.98185	C24H40O4	[M-H]-	Steroids and steroid derivatives	Bile acids, alcohols and derivatives	C04483	Lipid metabolism; Digestive system	83-44-3	HMDB0000626	BioDeepDB	2	neg	3.37363e+06	3.03178e+06	4.97973e+06	3.03687e+06
M448T327_1	Glycochenodeoxycholic acid	448.306	326.7	449.314	1.83803	C26H43NO5	[M-H]-			C05466	Lipid metabolism; Digestive system	16564-43-5		BioDeepDB	2	neg	3.40825e+07	2.90004e+07	2.00953e+07	4.19472e+06
M109T149	1,3-Benzenediol	109.03	148.7	110.037	2.53142	C6H6O2	[M-H]-	Benzene and substituted derivatives	Phenols and derivatives	C01751	Xenobiotics biodegradation and metabolism; Global and overview maps	108-46-3	HMDB0032037	BioDeepDB	2	neg	1.55571e+07	2.28939e+07	2.64681e+07	2.14487e+07
M135T288	o-Toluate	135.046	288.3	136.052	5.00571	C8H8O2	[M-H]-	Benzene and substituted derivatives	Benzoic acids and derivatives	C07215	Xenobiotics biodegradation and metabolism; Global and overview maps	118-90-1	HMDB0002340	mzCloud	2	neg	2.00568e+06	2.05028e+06	1.63882e+06	1.95824e+06
M157T51	Allantoin	157.037	50.8	158.044	1.75755	C4H6N4O3	[M-H]-	Azoles	Imidazoles	C01551		97-59-6	HMDB0000462	BioDeepDB	2	neg	3.28069e+07	3.69981e+07	3.25534e+07	2.27741e+07
M148T54	L-Methionine	148.044	53.6	149.051	2.02642	C5H11NO2S	[M-H]-	Carboxylic acids and derivatives	Amino acids, peptides, and analogues	C00073	Cancer: overview; Drug resistance: antineoplastic; Digestive system; Biosynthesis of other secondary metabolites; Translation; Amino acid metabolism; Chemical structure transformation maps; Global and overview maps	63-68-3	HMDB0000696	BioDeepDB	2	neg	1.65866e+07	3.95212e+06	1.27705e+07	5.9801e+06
M165T633	7-Methylxanthine	165.041	633.2	166.049	4.84728	C6H6N4O2	[M-H]-	Imidazopyrimidines	Purines and purine derivatives	C16353	Biosynthesis of other secondary metabolites; Global and overview maps	552-62-5	HMDB0001991	BioDeepDB	2	neg	1.25391e+08	1.04856e+08	2.33619e+07	6.31845e+07
M165T676	1-Methylxanthine	165.039	676.2	166.049	15.7538	C6H6N4O2	[M-H]-	Imidazopyrimidines	Purines and purine derivatives	C16358	Biosynthesis of other secondary metabolites; Global and overview maps	6136-37-4	HMDB0010738	BioDeepDB	2	neg	1.03952e+08	1.48635e+07	6.65141e+07	4.65866e+07
M173T51	N-Acetylornithine	173.093	50.6	174.1	0.577723	C7H14N2O3	[M-H]-	Carboxylic acids and derivatives	Amino acids, peptides, and analogues	C00437	Amino acid metabolism; Global and overview maps	6205-08-9/2185-16-2	HMDB0003357	BioDeepDB	2	neg	7.98122e+07	2.64925e+07	8.19376e+07	3.64895e+07
M174T46	Citrulline	174.088	46.1	175.096	1.14884	C6H13N3O3	[M-H]-	Carboxylic acids and derivatives	Amino acids, peptides, and analogues	C00327	Amino acid metabolism; Biosynthesis of other secondary metabolites; Global and overview maps	372-75-8	HMDB0000904	BioDeepDB	2	neg	2.61968e+07	1.19308e+07	3.49761e+07	1.03828e+07
M229T242	Dodecanedioic acid	229.145	241.7	230.152	2.07729	C12H22O4	[M-H]-	Fatty Acyls	Fatty acids and conjugates	C02678		693-23-2	HMDB0000623	mzCloud	2	neg	8.47679e+06	1.16766e+07	8.36569e+06	5.15837e+06
M253T614	Palmitoleic acid	253.217	614.1	254.225	0.411504	C16H30O2	[M-H]-	Fatty Acyls	Fatty acids and conjugates	C08362	Lipid metabolism	373-49-9	HMDB0003229	MoNA	2	neg	5.33305e+06	2.53215e+07	9.4993e+06	6.74333e+07
M279T687	Bovinic acid	279.23	687	280.24	10.8298	C18H32O2	[M-H]-	Fatty Acyls	Lineolic acids and derivatives	C04056	Lipid metabolism	2540-56-9	HMDB0003797	BioDeepDB	2	neg	1.08767e+07	2.3891e+06	751946	6.26816e+06
M293T506	13-L-Hydroperoxylinoleic acid	293.212	506	312.23	2.01219	C18H32O4	[M-H2O-H]-	Fatty Acyls	Lineolic acids and derivatives	C04717	Lipid metabolism; Global and overview maps	33964-75-9	HMDB0003871	BioDeepDB	2	neg	6.97654e+06	8.74746e+06	1.25549e+07	9.40695e+06
M295T536	9,10-Epoxyoctadecenoic acid	295.229	536.3	296.235	3.72592	C18H32O3	[M-H]-	Fatty Acyls	Fatty acids and conjugates	C14825	Lipid metabolism; Global and overview maps		HMDB0004701	BioDeepDB	2	neg	1.0011e+07	1.2059e+07	1.21639e+07	1.65899e+07
M319T510	20-HETE	319.228	510.1	320.235	0.0751814	C20H32O3	[M-H]-	Fatty Acyls	Fatty acids and conjugates	C14748	Lipid metabolism; Global and overview maps; Circulatory system	79551-86-3	HMDB0005998	BioDeepDB	2	neg	8.21855e+06	7.4439e+06	9.43729e+06	1.81485e+07
M333T446	13,14-Dihydro-15-keto-PGE2	333.205	446.3	352.225	4.83186	C20H32O5	[M-H2O-H]-	Fatty Acyls	Eicosanoids	C04671		363-23-5	HMDB0002776	BioDeepDB	2	neg	2.22253e+06	3.97584e+06	4.02946e+06	1.46173e+07
M193T280	Isoferulic acid	193.054	280.2	194.058	20.0316	C10H10O4	[M-H]-	Cinnamic acids and derivatives	Hydroxycinnamic acids and derivatives	C10470		537-73-5	HMDB0000955	MoNA	2	neg	95212.4	2.95597e+06	837713	1.4874e+06
M243T53	Uridine	243.062	53.1	244.07	0.575556	C9H12N2O6	[M-H]-	Pyrimidine nucleosides		C00299	Membrane transport; Global and overview maps; Nucleotide metabolism	58-96-8	HMDB0000296	MoNA	2	neg	1.61997e+07	2.44907e+07	1.88424e+07	1.35454e+07
M281T553	Vaccenic acid	281.249	553.3	282.256	2.04801	C18H34O2	[M-H]-	Fatty Acyls	Fatty acids and conjugates	C08367		693-72-1	HMDB0003231	MoNA	2	neg	6.35397e+07	7.46275e+07	3.25321e+07	1.22776e+07
M320T90	Topiramate	320.073	89.9	339.099	21.9012	C12H21NO8S	[M-H2O-H]-	Dioxolopyrans		C07502		97240-79-4	HMDB0005034	MoNA	2	neg	2.13906e+06	1.35678e+06	2.83266e+06	1.68947e+06
M285T393	Hexadecanedioate	285.208	393.5	286.214	3.77268	C16H30O4	[M-H]-	Fatty Acyls	Fatty acids and conjugates	C19615	Lipid metabolism; Global and overview maps	505-54-4	HMDB0000672	mzCloud	2	neg	1.1607e+07	4.51702e+06	3.27661e+06	6.81372e+06
M313T388	12,13-DHOME	313.237	388.4	314.246	3.26909	C18H34O4	[M-H]-	Fatty Acyls	Fatty acids and conjugates	C14829	Lipid metabolism		HMDB0004705	mzCloud	2	neg	8.62017e+06	3.95896e+06	5.04397e+06	4.53141e+06
M317T412	PGA1	317.212	412.4	336.23	0.662019	C20H32O4	[M-H2O-H]-	Fatty Acyls	Eicosanoids	C04685		14152-28-4	HMDB0002656	mzCloud	2	neg	621577	977687	919508	2.49545e+06

## Sheet: Tables11
Table.S11 Untargeted metabolome data from mouse serum
ID	name	mz	rt	exact_mass	ppm	formula	precursor_type	class	sub_class	KEGG	KEGG_Pathway	CAS	hmdb	library	level	posneg	NNC-1	NNC-2	NNC-4	NNC-7
M348T388	11b,21-Dihydroxy-5b-pregnane-3,20-dione	348.224	388.4	348.23	16.3685	C21H32O4	[M]+	Organic oxides	Alcohols and polyols	C05475	Lipid metabolism	566-01-8	HMDB0006757	MetaDNA	2	pos	7.25961e+06	6.46112e+06	6.66128e+06	6.62908e+06
M250T84	Adenosine	250.094	84.1	267.097	16.9299	C10H13N5O4	[M+H-H2O]+	Azacyclic compounds	Alcohols and polyols	C00212	Circulatory system; Membrane transport; Signal transduction; Endocrine system; Neurodegenerative disease; Signaling molecules and interaction; Nucleotide metabolism; Substance dependence	58-61-7	HMDB0000050	MetaDNA	2	pos	5.91925e+06	2.09579e+06	1.267e+06	1.9489e+06
M516T327	Taurohyocholate	516.296	326.6	515.292	5.18304	C26H45NO7S	[M+H]+	Carboxylic acids and derivatives	Alcohols and polyols	C15516		117997-17-8	HMDB0011637	MetaDNA	2	pos	4.89015e+06	2.41497e+06	3.36321e+06	3.89608e+06
M331T291_1	17alpha,21-Dihydroxypregnenolone	331.213	290.9	348.23	28.579	C21H32O4	[M+H-H2O]+	Organic oxides	Alcohols and polyols	C05487	Lipid metabolism	1167-48-2	HMDB0006762	MetaDNA	2	pos	3.30838e+06	3.28487e+06	3.41008e+06	3.18978e+06
M109T287	m-Cresol	109.101	286.9	108.058	0.580358	C7H8O	[M+H]+	Phenols	Cresols	C01467		108-39-4	HMDB0002048	BioDeepDB	2	pos	7.01935e+06	2.17985e+07	5.76734e+06	6.47173e+06
M111T30	Hydroquinone	111.019	30.2	110.037	9.0778	C6H6O2	[M+H]+	Phenols	Benzenediols	C00530	Amino acid metabolism	123-31-9	HMDB0002434	BioDeepDB	2	pos	7.07952e+07	2.20706e+08	8.54158e+07	8.17344e+07
M111T689	Pyrrole-2-carboxylic acid	111.019	689.3	111.032	7.5733	C5H5NO2	[M]+	Pyrroles	Pyrrole carboxylic acids and derivatives	C05942	Amino acid metabolism	634-97-9	HMDB0004230	BioDeepDB	2	pos	1.20018e+07	1.18774e+07	5.3747e+07	1.15196e+07
M114T650	Creatinine	114.066	650.4	113.059	0.210404	C4H7N3O	[M+H]+	Carboxylic acids and derivatives	Amino acids, peptides, and analogues	C00791	Amino acid metabolism	60-27-5	HMDB0000562	BioDeepDB	2	pos	4.5487e+07	3.61751e+07	2.68429e+07	3.5655e+07
M118T187	Indole	118.065	187	117.058	4.74652e-05	C8H7N	[M+H]+	Indoles and derivatives	Indoles	C00463	Amino acid metabolism; Digestive system	120-72-9	HMDB0000738	BioDeepDB	2	pos	1.40299e+07	661438	866688	1.39156e+07
M124T642	Nicotinic acid	124.087	642.2	123.032	1.37548	C6H5NO2	[M+H]+	Pyridines and derivatives	Pyridinecarboxylic acids and derivatives	C00253	Metabolism of cofactors and vitamins; Infectious disease: bacterial	59-67-6	HMDB0001488	BioDeepDB	2	pos	1.0937e+08	2.37949e+08	9.09975e+07	7.58206e+07
M124T688	Picolinic acid	124.087	688.2	123.032	0.524705	C6H5NO2	[M+H]+	Pyridines and derivatives	Pyridinecarboxylic acids and derivatives	C10164	Amino acid metabolism	98-98-6 / 14639-25-9	HMDB0002243	BioDeepDB	2	pos	2.17049e+08	3.50772e+08	1.08541e+09	2.14192e+08
M127T86	Thymine	127.05	86.4	126.043	0.975991	C5H6N2O2	[M+H]+	Diazines	Pyrimidines and pyrimidine derivatives	C00178	Nucleotide metabolism	65-71-4	HMDB0000262	BioDeepDB	2	pos	9.54727e+06	1.09658e+07	1.23299e+07	1.11295e+07
M130T71	Pipecolic acid	130.05	71.2	129.079	21.8125	C6H11NO2	[M+H]+	Carboxylic acids and derivatives	Amino acids, peptides, and analogues	C00408	Amino acid metabolism	535-75-1 / 3105-95-1	HMDB0000070	BioDeepDB	2	pos	5.39578e+07	4.672e+07	5.49191e+07	5.25883e+07
M148T72	trans-Cinnamate	148.043	72.3	148.052	0.413065	C9H8O2	[M]+			C00423	Amino acid metabolism; Metabolism of cofactors and vitamins	140-10-3		BioDeepDB	2	pos	1.17216e+07	8.39347e+06	7.73552e+06	9.98758e+06
M132T32	cis-4-Hydroxy-D-proline	131.974	32.4	131.058	4.16731	C5H9NO3	[M+H]+	Carboxylic acids and derivatives	Amino acids, peptides, and analogues	C03440	Amino acid metabolism	2584-71-6	HMDB0060460	BioDeepDB	2	pos	2.50382e+07	2.40174e+07	2.43336e+07	2.6186e+07
M152T41	Xanthine	152.036	41.2	152.033	17.1012	C5H4N4O2	[M]+	Imidazopyrimidines	Purines and purine derivatives	C00385	Biosynthesis of other secondary metabolites; Nucleotide metabolism	69-89-6	HMDB0000292	BioDeepDB	2	pos	5.678e+07	7.89791e+07	5.91876e+07	5.95026e+07
M155T287	2,3-Butanediol	155.107	286.9	154.012	3.1932	C4H10O2S2	[M+H]+	Organooxygen compounds	Alcohols and polyols	C00265		513-85-9 / 3483-12-3	HMDB0003156	BioDeepDB	2	pos	9.37326e+06	1.2502e+07	8.6474e+06	1.12058e+07
M142T76	O-Phosphoethanolamine	141.959	75.8	141.019	0.313519	C2H8NO4P	[M+H]+	Organic phosphoric acids and derivatives	Phosphate esters	C00346	Lipid metabolism; Signal transduction	1071-23-4	HMDB0000224	BioDeepDB	2	pos	3.36766e+07	3.48278e+07	3.83365e+07	4.27391e+07
M149T170	L-2-Hydroxyglutaric acid	148.976	169.6	148.037	4.26593	C5H8O5	[M+H]+	Fatty Acyls	Fatty acids and conjugates	C03196	Amino acid metabolism	13095-48-2	HMDB0000694	BioDeepDB	2	pos	1.50028e+07	1.67798e+07	2.13228e+07	2.00299e+07
M149T550	3-Methyladenine	149.024	549.9	149.07	4.11647	C6H7N5	[M]+	Imidazopyrimidines	Purines and purine derivatives	C00913		5142-23-4	HMDB0011600	BioDeepDB	2	pos	1.75448e+08	1.27978e+08	7.5991e+07	1.44297e+08
M156T44	L-Histidine	156.077	43.8	155.07	1.13005	C6H9N3O2	[M+H]+	Carboxylic acids and derivatives	Amino acids, peptides, and analogues	C00135	Cancer: overview; Membrane transport; Metabolism of other amino acids; Digestive system; Translation; Amino acid metabolism	71-00-1	HMDB0000177	BioDeepDB	2	pos	1.06647e+07	2.12056e+07	5.65905e+07	1.94821e+07
M157T95	Uracil 5-carboxylate	156.966	94.5	156.017	3.20701	C5H4N2O4	[M+H]+			C03030		23945-44-0		BioDeepDB	2	pos	363327	129742	244041	246138
M157T339_1	3-Indoleacetonitrile	157.123	339	156.069	2.36709	C10H8N2	[M+H]+	Indoles and derivatives	Indoles	C02938	Amino acid metabolism	771-51-7	HMDB0006524	BioDeepDB	2	pos	373682	830659	936163	862986
M159T95	4,5-Dihydroorotic acid	158.961	95.4	158.033	1.18168	C5H6N2O4	[M+H]+	Carboxylic acids and derivatives	Amino acids, peptides, and analogues	C00337	Nucleotide metabolism	155-54-4 / 5988-19-2	HMDB0000528	BioDeepDB	2	pos	5.01453e+08	5.07447e+08	6.39411e+08	5.10305e+08
M162T293	Tryptophanol	162.092	292.6	161.084	1.63898	C10H11NO	[M+H]+	Indoles and derivatives	Indoles	C00955	Amino acid metabolism	526-55-6	HMDB0003447	BioDeepDB	2	pos	1.02229e+06	807474	879884	849671
M164T33	Acetylcysteine	163.941	33.2	163.03	2.72419	C5H9NO3S	[M+H]+	Carboxylic acids and derivatives	Amino acids, peptides, and analogues	C06809		616-91-1	HMDB0001890	BioDeepDB	2	pos	1.648e+07	1.99781e+07	1.22275e+07	1.69067e+07
M163T388	Anabasine	163.039	388	162.116	0.0010482	C10H14N2	[M+H]+			C06180		13078-04-1 / 494-52-0	HMDB0004350	BioDeepDB	2	pos	5.31231e+06	4.19598e+06	9.09618e+06	5.89381e+06
M170T89	Norepinephrine	170.082	88.8	169.074	1.90497	C8H11NO3	[M+H]+	Phenols	Benzenediols	C00547	Circulatory system; Nervous system; Signal transduction; Sensory system; Endocrine system; Digestive system; Environmental adaptation; Signaling molecules and interaction; Amino acid metabolism; Cellular community - eukaryotes	51-41-2	HMDB0000216	BioDeepDB	2	pos	2.97344e+06	5.76446e+06	5.60381e+06	2.48899e+06
M187T297	Undecanoic acid	186.96	297.2	186.162	18.4158	C11H22O2	[M+H]+	Fatty Acyls	Fatty acids and conjugates	C17715		112-37-8	HMDB0000947	BioDeepDB	2	pos	2.04214e+06	1.99677e+07	4.39819e+07	1.62779e+07
M172T191	3-Dehydroshikimate	171.996	191.4	172.037	13.9909	C7H8O5	[M]+			C02637	Amino acid metabolism	2922-42-1		BioDeepDB	2	pos	1.44948e+07	3.79479e+06	7.70823e+06	1.36439e+07
M191T48	Diaminopimelic acid	191.041	47.6	190.095	28.1401	C7H14N2O4	[M+H]+	Carboxylic acids and derivatives	Amino acids, peptides, and analogues	C00666		583-93-7 / 14289-34-0 / NA	HMDB0001370	BioDeepDB	2	pos	5.02142e+07	5.67909e+06	6.67185e+06	6.85629e+06
M174T245	Quinaldic acid	174.055	245	173.048	2.58165	C10H7NO2	[M+H]+	Quinolines and derivatives	Quinoline carboxylic acids	C06325		93-10-7	HMDB0000842	BioDeepDB	2	pos	2.89305e+06	1.19828e+06	2.17415e+06	1.65703e+06
M175T58	L-Arginine	175.119	58.1	174.112	0.954753	C6H14N4O2	[M+H]+	Carboxylic acids and derivatives	Amino acids, peptides, and analogues	C00062	Cancer: overview; Membrane transport; Signal transduction; Digestive system; Neurodegenerative disease; Translation; Amino acid metabolism; Infectious disease: parasitic	74-79-3	HMDB0000517	BioDeepDB	2	pos	4.34073e+07	3.10142e+07	3.3425e+07	3.72776e+07
M183T34	Sorbitol	182.987	34.2	182.079	1.7023	C6H14O6	[M+H]+	Organooxygen compounds	Carbohydrates and carbohydrate conjugates	C00794	Carbohydrate metabolism; Membrane transport	50-70-4	HMDB0000247	BioDeepDB	2	pos	1.1205e+08	2.49456e+07	3.35114e+07	6.28258e+07
M182T71	L-Tyrosine	182.082	71.4	181.074	0.116854	C9H11NO3	[M+H]+	Carboxylic acids and derivatives	Amino acids, peptides, and analogues	C00082	Cancer: overview; Metabolism of cofactors and vitamins; Nervous system; Digestive system; Endocrine system; Neurodegenerative disease; Translation; Amino acid metabolism; Substance dependence	60-18-4	HMDB0000158	BioDeepDB	2	pos	7.49696e+08	6.16165e+08	7.83e+08	1.55944e+09
M200T297	Dodecanoic acid	199.988	296.8	200.178	3.58332	C12H24O2	[M]+	Fatty Acyls	Fatty acids and conjugates	C02679	Lipid metabolism	143-07-7	HMDB0000638	BioDeepDB	2	pos	1.60516e+07	1.09687e+07	1.05157e+07	6.5285e+06
M184T110	3,4-Dihydroxymandelic acid	184.17	109.8	184.037	1.86731	C8H8O5	[M]+			C05580	Amino acid metabolism	14883-87-5	HMDB0001866	BioDeepDB	2	pos	8.20647e+06	1.51387e+07	9.00328e+06	2.40892e+06
M188T301	N-Alpha-acetyllysine	188.071	301.2	188.116	1.41625	C8H16N2O3	[M]+	Carboxylic acids and derivatives	Amino acids, peptides, and analogues	C12989		1946-82-3	HMDB0000446	BioDeepDB	2	pos	3.01878e+06	3.02555e+06	2.85272e+06	3.19715e+06
M190T356	N-Acetylglutamic acid	190.087	356.5	189.064	24.4251	C7H11NO5	[M+H]+	Carboxylic acids and derivatives	Amino acids, peptides, and analogues	C00624	Amino acid metabolism	1188-37-0	HMDB0001138	BioDeepDB	2	pos	1.79436e+07	7.61657e+06	2.15908e+07	1.58421e+07
M208T293	N-Acetyl-L-phenylalanine	208.097	292.6	207.089	0.115331	C11H13NO3	[M+H]+	Carboxylic acids and derivatives	Amino acids, peptides, and analogues	C03519	Amino acid metabolism	2018-61-3	HMDB0000512	BioDeepDB	2	pos	6.80798e+06	4.00756e+06	3.86797e+06	5.32962e+06
M192T271	5-Hydroxyindoleacetic acid	192.066	271.2	191.058	0.645613	C10H9NO3	[M+H]+	Indoles and derivatives	Indolyl carboxylic acids and derivatives	C05635	Amino acid metabolism; Nervous system	54-16-0	HMDB0000763	BioDeepDB	2	pos	2.03784e+06	255412	286097	997919
M216T87	12-Hydroxydodecanoic acid	216.196	86.7	216.173	3.74144	C12H24O3	[M]+	Hydroxy acids and derivatives	Medium-chain hydroxy acids and derivatives	C08317		505-95-3	HMDB0002059	BioDeepDB	2	pos	1.63359e+06	2.55849e+06	2.47851e+06	3.59566e+06
M220T106	Pantothenic acid	220.119	105.7	219.111	3.28913	C9H17NO5	[M+H]+	Alcohols and polyols	Polyols	C00864	Metabolism of cofactors and vitamins; Metabolism of other amino acids; Digestive system	79-83-4 / 20938-62-9 / 137-08-6	HMDB0000210	BioDeepDB	2	pos	5.54e+07	1.01446e+08	6.8376e+07	4.26187e+07
M224T379_2	Hydroxykynurenine	224.128	378.7	224.08	1.48136	C10H12N2O4	[M]+	Organooxygen compounds	Carbonyl compounds	C02794		484-78-6 / 2147-61-7	HMDB0000732	BioDeepDB	2	pos	1.33037e+07	1.20386e+07	1.03007e+07	1.19254e+07
M226T636	Porphobilinogen	226.181	636	226.095	1.07325	C10H14N2O4	[M]+	Organonitrogen compounds	Amines	C00931	Metabolism of cofactors and vitamins	487-90-1	HMDB0000245	BioDeepDB	2	pos	3.40902e+06	4.54701e+06	6.22006e+06	4.07451e+06
M255T504	Palmitoleic acid	255.232	504.1	254.225	1.26943	C16H30O2	[M+H]+	Fatty Acyls	Fatty acids and conjugates	C08362	Lipid metabolism	373-49-9	HMDB0003229	BioDeepDB	2	pos	3.82042e+07	2.13337e+07	1.18574e+07	1.87731e+07
M243T313	Lumichrome	243.087	313.2	242.08	1.54677	C12H10N4O2	[M+H]+			C01727	Metabolism of cofactors and vitamins	1086-80-2		BioDeepDB	2	pos	1.66177e+06	168280	1.05574e+06	1.4491e+06
M256T609	Palmitic acid	256.263	609	256.24	2.1602	C16H32O2	[M]+	Fatty Acyls	Fatty acids and conjugates	C00249	Lipid metabolism	57-10-3	HMDB0000220	BioDeepDB	2	pos	7.06921e+08	5.89591e+08	9.21599e+08	1.11225e+09
M278T254	Gamma-Linolenic acid	278.186	254.4	278.225	4.11587	C18H30O2	[M]+	Fatty Acyls	Lineolic acids and derivatives	C06426	Lipid metabolism	506-26-3	HMDB0003073	BioDeepDB	2	pos	1.0593e+07	1.71025e+07	1.17949e+07	1.82455e+07
M280T586	Linoleic acid	280.263	585.6	280.24	0.971231	C18H32O2	[M]+	Fatty Acyls	Lineolic acids and derivatives	C01595	Lipid metabolism	60-33-3	HMDB0000673	BioDeepDB	2	pos	1.76898e+08	2.75445e+08	2.53102e+08	2.26293e+08
M282T619	Oleic acid	282.279	619.3	282.256	0.0551254	C18H34O2	[M]+	Fatty Acyls	Fatty acids and conjugates	C00712	Lipid metabolism	112-80-1	HMDB0000207	BioDeepDB	2	pos	9.2853e+08	1.85146e+09	2.3284e+09	1.13051e+09
M271T398	Baicalein	271.275	397.8	270.053	1.2911	C15H10O5	[M+H]+	Flavonoids	Flavonoid glycosides	C10023		192224-98-9 / 491-67-8	HMDB0031991	BioDeepDB	2	pos	240868	295276	317549	364101
M273T411	Estradiol	273.253	410.8	272.178	2.442	C18H24O2	[M+H]+	Steroids and steroid derivatives	Estrane steroids	C00951	Cancer: overview; Excretory system; Endocrine system; Lipid metabolism; Environmental adaptation; Cancer: specific types	50-28-2	HMDB0000151	BioDeepDB	2	pos	3.81496e+07	2.59914e+07	3.12099e+07	2.75959e+07
M282T632	1-Methyladenosine	282.221	631.7	281.112	8.40501	C11H15N5O4	[M+H]+	Purine nucleosides		C02494		15763-06-1	HMDB0003331	BioDeepDB	2	pos	2.97569e+07	1.28036e+07	2.23329e+06	2.16184e+07
M302T459	Sphinganine	302.305	459	301.298	0.545901	C18H39NO2	[M+H]+	Organonitrogen compounds	Amines	C00836	Lipid metabolism; Signal transduction	764-22-7	HMDB0000269	BioDeepDB	2	pos	2.88667e+07	1.36668e+07	2.73591e+07	2.88815e+07
M286T428	Fisetin	286.274	427.8	286.048	1.84329	C15H10O6	[M]+			C10041		345909-34-4		BioDeepDB	2	pos	505052	259063	2.04771e+06	1.73337e+06
M289T429	Testosterone	289.216	429	288.209	0.017613	C19H28O2	[M+H]+			C00535	Lipid metabolism; Cancer: overview; Endocrine system; Cancer: specific types	58-22-0		BioDeepDB	2	pos	2.21081e+06	3.008e+06	2.13261e+06	3.11252e+06
M298T154	5'-Methylthioadenosine	298.097	153.9	297.09	0.925874	C11H15N5O3S	[M+H]+	5'-deoxyribonucleosides	5'-deoxy-5'-thionucleosides	C00170	Amino acid metabolism	2457-80-9	HMDB0001173	BioDeepDB	2	pos	3.78255e+07	2.00923e+07	4.62804e+06	2.5194e+07
M307T71_1	Glutathione	307.082	71.2	307.084	3.27934	C10H17N3O6S	[M]+			C00051	Membrane transport; Cell growth and death; Metabolism of other amino acids; Digestive system; Endocrine system; Amino acid metabolism	70-18-8		BioDeepDB	2	pos	3.03726e+07	1.24217e+07	6.67303e+06	3.94263e+07
M312T574	Aflatoxin B1	312.363	573.7	312.063	0.0393888	C17H12O6	[M]+	Coumarins and derivatives	Furanocoumarins	C06800	Xenobiotics biodegradation and metabolism; Cancer: specific types	1162-65-8	HMDB0006552	BioDeepDB	2	pos	9.32093e+07	4.98316e+07	4.33617e+07	5.37392e+07
M334T403	Nicotinamide ribotide	334.294	402.7	334.057	3.56543	C11H15N2O8P	[M]+	Pyridine nucleotides	Nicotinamide nucleotides	C00455	Metabolism of cofactors and vitamins	1094-61-7	HMDB0000229	BioDeepDB	2	pos	3.09359e+06	1.61492e+07	2.56529e+07	3.88141e+06
M336T594	12-Keto-tetrahydro-leukotriene B4	336.311	593.6	336.23	3.81946	C20H32O4	[M]+	Fatty Acyls	Eicosanoids	C02165	Sensory system; Nervous system; Digestive system; Endocrine system; Lipid metabolism; Signaling molecules and interaction	71160-24-2	HMDB0002995	BioDeepDB	2	pos	3.82681e+06	1.23577e+07	1.17666e+07	1.28411e+07
M338T623	Erucic acid	338.343	622.5	338.318	5.23224	C22H42O2	[M]+	Fatty Acyls	Fatty acids and conjugates	C08316	Lipid metabolism	112-86-7	HMDB0002068	BioDeepDB	2	pos	1.08426e+09	4.65077e+09	5.43972e+09	4.0064e+09
M346T463_1	Cortexolone	345.938	463.5	346.214	1.93527	C21H30O4	[M]+	Steroids and steroid derivatives	Hydroxysteroids	C05488	Lipid metabolism; Endocrine and metabolic disease; Endocrine system	152-58-9	HMDB0000015	BioDeepDB	2	pos	7.76595e+07	8.69081e+07	5.74788e+07	1.19513e+08
M347T388_1	Corticosterone	347.22	388.5	346.214	4.2509	C21H30O4	[M+H]+	Steroids and steroid derivatives	Hydroxysteroids	C02140	Lipid metabolism; Neurodegenerative disease; Endocrine system	50-22-6	HMDB0001547	BioDeepDB	2	pos	3.75771e+07	2.97634e+07	2.70935e+07	3.22282e+07
M361T547	Aldosterone	361.222	547	360.194	0.887423	C21H28O5	[M+H]+	Steroids and steroid derivatives	Hydroxysteroids	C01780	Lipid metabolism; Excretory system; Endocrine system	52-39-1	HMDB0000037	BioDeepDB	2	pos	2.13243e+07	1.43107e+07	2.44801e+07	2.22828e+07
M377T251	Riboflavin	377.145	250.7	376.138	0.0666702	C17H20N4O6	[M+H]+	Pteridines and derivatives	Alloxazines and isoalloxazines	C00255	Metabolism of cofactors and vitamins; Digestive system; Membrane transport	83-88-5	HMDB0000244	BioDeepDB	2	pos	5.16958e+06	5.62863e+06	4.82136e+06	4.49423e+06
M397T464	Ergocalciferol	397.2	463.6	396.339	3.08965	C28H44O	[M+H]+	Steroids and steroid derivatives	Vitamin D and derivatives	C05441	Lipid metabolism	50-14-6	HMDB0000900	BioDeepDB	2	pos	3.31285e+06	7.78109e+06	6.80012e+06	6.02469e+06
M384T441_1	Desmosterol	384.345	440.6	384.339	2.55749	C27H44O	[M]+	Steroids and steroid derivatives	Cholestane steroids	C01802	Lipid metabolism	313-04-2	HMDB0002719	BioDeepDB	2	pos	7.50587e+06	2.46598e+06	5.07818e+06	1.87574e+06
M402T229	25-Hydroxycholesterol	402.212	229.2	402.35	2.23109	C27H46O2	[M]+	Steroids and steroid derivatives	Cholestane steroids	C15519	Lipid metabolism	2140-46-7	HMDB0006247	BioDeepDB	2	pos	3.35569e+06	112140	228053	278049
M408T642	Allocholic acid	408.369	642.4	408.288	4.48464	C24H40O5	[M]+	Steroids and steroid derivatives	Bile acids, alcohols and derivatives	C00695	Lipid metabolism; Digestive system	2464-18-8 / 81-25-4	HMDB0000505	BioDeepDB	2	pos	1.1302e+06	1.49115e+06	1.24063e+08	8.87883e+07
M391T577	Adenosine 5'-phosphate disodium	391.284	577.5	391.027	0.453096	C10H12N5O7P. 2Na	[M]+					4578-31-8		BioDeepDB	2	pos	5.85748e+07	1.15552e+08	8.30672e+07	8.95366e+07
M393T458_1	Deoxycholic acid	393.285	458	392.293	1.00856	C24H40O4	[M+H]+	Steroids and steroid derivatives	Bile acids, alcohols and derivatives	C04483	Digestive system	83-44-3	HMDB0000626	BioDeepDB	2	pos	5.17576e+08	4.13058e+08	2.3949e+08	4.66482e+08
M415T475_1	Sodium deoxycholate	415.205	475.4	414.275	13.4355	C24H39O4. Na	[M+H]+			C11171		302-95-4		BioDeepDB	2	pos	4.69203e+07	3.60281e+07	4.54278e+07	3.36312e+07
M432T464_2	Isovitexin	432.236	463.6	432.106	6.04002	C21H20O10	[M]+			C01714		38953-85-4 / 29702-25-8		BioDeepDB	2	pos	7.67719e+08	2.45525e+07	5.42519e+08	8.75518e+08
M468T585	Deoxyuridine-5'-triphosphate	468.386	585.2	467.974	8.00226	C9H15N2O14P3	[M+H]+			C00460	Nucleotide metabolism	102814-08-4	HMDB0001191	BioDeepDB	2	pos	8.86295e+06	1.2103e+07	7.405e+06	2.93545e+07
M107T98	Benzaldehyde	107.049	98.3	106.042	0.000391417	C7H6O	[M+H]+	Benzene and substituted derivatives	Benzoyl derivatives	C00261		100-52-7	HMDB0006115	BioDeepDB	2	pos	5.58936e+06	3.75393e+06	5.87745e+06	5.45072e+06
M126T50	Taurine	126.022	49.5	125.015	0.190443	C2H7NO3S	[M+H]+	Organic sulfonic acids and derivatives	Organosulfonic acids and derivatives	C00245	Membrane transport; Metabolism of other amino acids; Lipid metabolism; Signaling molecules and interaction; Energy metabolism	107-35-7	HMDB0000251	BioDeepDB	2	pos	2.15209e+07	2.48759e+07	1.75645e+07	2.3822e+07
M130T377	Pyrrolidonecarboxylic acid	130.049	377.2	129.043	5.96698	C5H7NO3	[M+H]+	Carboxylic acids and derivatives	Amino acids, peptides, and analogues	C02237		4042-36-8	HMDB0000805	BioDeepDB	2	pos	4.54371e+07	2.91608e+07	2.09677e+07	2.67763e+07
M130T54	(2E)-Decenoyl-ACP	130.086	53.7	129.079	0	C6H11NO2	[M+H]+	Carboxylic acids and derivatives	Amino acids, peptides, and analogues	C03969		52-52-8	HMDB0062225	BioDeepDB	2	pos	5.40085e+07	9.20091e+07	1.15234e+08	1.01348e+08
M147T43	L-Lysine	147.113	43.2	146.106	4.07849	C6H14N2O2	[M+H]+	Carboxylic acids and derivatives	Amino acids, peptides, and analogues	C00047	Metabolism of cofactors and vitamins; Membrane transport; Digestive system; Translation; Amino acid metabolism	56-87-1	HMDB0000182	BioDeepDB	2	pos	9.39216e+07	1.65789e+08	1.66002e+08	3.03926e+08
M170T486	Diphenylamine	170.097	485.5	169.089	2.3516	C12H11N	[M+H]+	Benzene and substituted derivatives	Anilines	C11016		122-39-4	HMDB0032562	BioDeepDB	2	pos	1.88848e+07	1.58228e+07	2.7221e+07	2.05891e+07
M174T277	N-Acetylleucine	174.113	277	173.105	1.14868	C8H15NO3	[M+H]+	Carboxylic acids and derivatives	Amino acids, peptides, and analogues	C02710		1188-21-2	HMDB0011756	BioDeepDB	2	pos	4.71093e+06	4.64435e+06	5.14854e+06	5.65397e+06
M197T384	Geranyl acetate	197.154	383.6	196.146	1.52165	C12H20O2	[M+H]+	Fatty Acyls	Fatty alcohol esters	C09861		105-87-3	HMDB0035157	BioDeepDB	2	pos	1.59333e+07	9.22808e+06	1.20089e+07	9.93184e+06
M180T250	Hippuric acid	180.066	250.4	179.058	1.66606	C9H9NO3	[M+H]+	Benzene and substituted derivatives	Benzoic acids and derivatives	C01586	Amino acid metabolism	495-69-2	HMDB0000714	BioDeepDB	2	pos	1.69921e+07	7.54122e+06	7.31781e+06	5.15375e+06
M184T499	Phosphorylcholine	184.072	498.8	184.074	6.51918	C5H15NO4P	[M+H]+	Organonitrogen compounds	Quaternary ammonium salts	C00588	Lipid metabolism; Cancer: overview	3616-04-4/107-73-3	HMDB0001565	BioDeepDB	2	pos	9.40008e+07	8.15526e+07	1.81878e+08	1.27221e+08
M194T467	Orciprenaline	194.118	467	211.121	21.2964	C11H17NO3	[M+H-H2O]+	Phenols	Benzenediols	C07144		586-06-1	HMDB0014954	BioDeepDB	2	pos	2.1832e+07	8.40374e+07	5.12728e+07	3.66728e+07
M203T48	Asymmetric dimethylarginine	203.151	48.1	202.143	0.0128589	C8H18N4O2	[M+H]+	Carboxylic acids and derivatives	Amino acids, peptides, and analogues	C03626		30315-93-6 / 220805-22-1	HMDB0001539	BioDeepDB	2	pos	9.58919e+06	8.85825e+06	6.51998e+06	6.50927e+06
M219T68	gamma-Glutamylalanine	219.097	68.3		0	C7H11N2O5R	[M+H]+	Carboxylic acids and derivatives	Amino acids, peptides, and analogues	C03740	Metabolism of other amino acids	5875-41-2	HMDB0006248	BioDeepDB	2	pos	2.67925e+06	2.03416e+06	604640	2.00691e+06
M219T352	Capsidiol	219.175	352	236.178	0.456257	C15H24O2	[M+H-H2O]+	Prenol lipids	Sesquiterpenoids	C09627		37208-05-2	HMDB0002352	BioDeepDB	2	pos	2.0562e+06	1.60818e+06	1.47378e+06	8.28895e+06
M282T573	Oleamide	282.278	573.4	281.272	3.89687	C18H35NO	[M+H]+	Fatty Acyls	Fatty amides	C19670		301-02-0	HMDB0002117	BioDeepDB	2	pos	1.47599e+08	7.15488e+07	4.34586e+07	5.47342e+07
M279T515	Alpha-dimorphecolic acid	279.232	515.4	296.235	0.71625	C18H32O3	[M+H-H2O]+	Fatty Acyls	Lineolic acids and derivatives	C14767	Lipid metabolism; Endocrine system	73543-67-6	HMDB0004670	BioDeepDB	2	pos	1.34405e+07	7.68779e+06	6.45992e+06	5.99404e+06
M295T527	13-L-Hydroperoxylinoleic acid	295.226	527.2	312.23	2.70978	C18H32O4	[M+H-H2O]+	Fatty Acyls	Lineolic acids and derivatives	C04717	Lipid metabolism	33964-75-9	HMDB0003871	BioDeepDB	2	pos	1.71111e+07	1.3389e+07	5.19663e+06	1.28181e+07
M303T531	8-HETE	303.231	530.5	320.235	3.29781	C20H32O3	[M+H-H2O]+	Fatty Acyls	Eicosanoids	C14776	Lipid metabolism; Endocrine system	98462-03-4	HMDB0004679	BioDeepDB	2	pos	1.48644e+08	6.61714e+07	3.30925e+07	7.93152e+07
M362T453	Sphingosine 1-phosphate	362.246	453.3	379.249	12.7924	C18H38NO5P	[M+H-H2O]+	Sphingolipids	Phosphosphingolipids	C06124	Signal transduction; Lipid metabolism; Signaling molecules and interaction; Infectious disease: bacterial; Immune system	26993-30-6	HMDB0000277	BioDeepDB	2	pos	4.12823e+06	3.36519e+06	3.35987e+06	2.31812e+06
M364T67	GMP	364.066	67.4	363.058	1.37338	C10H14N5O8P	[M+H]+	Purine nucleotides	Purine ribonucleotides	C00144	Sensory system; Signal transduction; Nucleotide metabolism	85-32-5	HMDB0001397	BioDeepDB	2	pos	4.94157e+06	6.28981e+06	6.51589e+06	1.15485e+06
M495T611_1	Mibefradil	495.298	610.9	495.29	7.67813	C29H38FN3O3	[M]+			C07222		116644-53-2		BioDeepDB	2	pos	2.04721e+08	1.82659e+08	2.20675e+08	9.57241e+07
M496T574_2	1-palmitoylglycerophosphocholine	496.338	573.9	496.34	3.42508	C24H51NO7P	[M+H]+	Glycerophospholipids	Glycerophosphocholines	C04102		17364-16-8	HMDB0062541	BioDeepDB	2	pos	1.47861e+08	1.16069e+08	6.32545e+07	2.14133e+08
M139T391	Isophorone	139.112	391.1	138.105	3.0479	C9H14O	[M+H]+	Carbonyl compounds	Ketones	C14743		78-59-1	HMDB0031195	mzCloud	2	pos	1.0333e+07	1.03667e+06	844049	445948
M133T43	Ornithine	133.097	43.3	132.09	2.43431	C5H12N2O2	[M+H]+	Carboxylic acids and derivatives	Amino acids, peptides, and analogues	C00077	Amino acid metabolism; Membrane transport; Metabolism of other amino acids	3184-13-2/70-26-8	HMDB0000214	BioDeepDB	2	pos	1.69917e+07	1.19319e+07	1.57706e+07	1.74463e+07
M205T71	O-Acetylcarnitine	205.127	71.2	204.124	20.8457	C9H18NO4	[M+H]+			C02571	Endocrine and metabolic disease	5080-50-2		BioDeepDB	2	pos	9.37337e+07	5.08772e+07	8.74523e+07	6.29913e+07
M363T363	Cortisol	363.216	362.7	362.209	0.48456	C21H30O5	[M+H]+	Steroids and steroid derivatives	Hydroxysteroids	C00735	Endocrine and metabolic disease; Cancer: overview; Excretory system; Digestive system; Endocrine system; Lipid metabolism; Signaling molecules and interaction; Cancer: specific types	50-23-7	HMDB0000063	BioDeepDB	2	pos	1.09784e+06	904792	571932	562297
M132T74	L-Leucine	132.102	74.3	131.095	2.99271	C6H13NO2	[M+H]+	Carboxylic acids and derivatives	Amino acids, peptides, and analogues	C00123	Cancer: overview; Membrane transport; Signal transduction; Digestive system; Translation; Amino acid metabolism	61-90-5	HMDB0000687	MoNA	2	pos	4.62592e+09	3.12112e+09	7.73169e+09	3.65616e+09
M136T71	2-Phenylacetamide	136.076	71.4	135.068	1.54393	C8H9NO	[M+H]+	Benzene and substituted derivatives	Phenylacetamides	C02505	Amino acid metabolism	103-81-1	HMDB0010715	MoNA	2	pos	6.30164e+07	4.54914e+07	4.35316e+07	5.66324e+07
M177T448	trans-Ferulic acid	177.055	447.6	194.058	24.4783	C10H10O4	[M+H-H2O]+	Cinnamic acids and derivatives	Hydroxycinnamic acids and derivatives	C01494		537-98-4/1135-24-6	HMDB0000954	MoNA	2	pos	5.0969e+06	2.01131e+06	1.89659e+06	3.28315e+06
M218T77	Propionylcarnitine	218.139	77	217.131	3.2819	C10H19NO4	[M+H]+	Fatty Acyls	Fatty acid esters	C03017		17298-37-2	HMDB0000824	MoNA	2	pos	3.59148e+07	4.56146e+07	3.2434e+07	4.26344e+07
M130T357	Isoquinoline	130.065	356.6	129.058	1.72221	C9H7N	[M+H]+	Isoquinolines and derivatives		C06323		119-65-3	HMDB0034244	mzCloud	2	pos	4.0234e+06	5.42516e+06	5.0698e+06	7.3319e+06
M165T54	3,4-Dihydroxyphenylpropanoate	165.055	53.8	182.058	26.2579	C9H10O4	[M+H-H2O]+	Phenylpropanoic acids		C10447	Amino acid metabolism	1078-61-1	HMDB0000423	mzCloud	2	pos	3.82838e+07	2.55297e+07	4.65654e+06	2.38059e+07
M165T328	4-Phenylbutyrate	165.092	327.8	164.084	3.77972	C10H12O2	[M+H]+	Benzene and substituted derivatives		C21793		1821-12-1	HMDB0000543	mzCloud	2	pos	1.87514e+06	972007	2.437e+06	2.29214e+06
M176T329	Indole-3-acetate	176.071	328.6	175.063	1.84017	C10H9NO2	[M+H]+	Indoles and derivatives	Indolyl carboxylic acids and derivatives	C00954	Amino acid metabolism	87-51-4	HMDB0000197	mzCloud	2	pos	5.8067e+06	2.99446e+06	3.36605e+06	2.3363e+06
M192T414	N,N-Diethyl-m-toluamide	192.138	414.4	191.131	0.0258926	C12H17NO	[M+H]+			C10935		134-62-3		BioDeepDB	2	pos	2.33503e+06	4.77782e+06	1.44474e+07	5.5152e+06
M211T465	(-)-Jasmonic acid	211.133	464.6	210.126	0.113672	C12H18O3	[M+H]+	Fatty Acyls	Lineolic acids and derivatives	C08491	Lipid metabolism	c("6894-38-8", "59366-47-1")	HMDB0032797	mzCloud	2	pos	1.46843e+07	6.80837e+06	4.05381e+06	1.03828e+07
M234T473	Polygodial	234.162	473.2	234.162	0.768491	C15H22O2	[M]+	Endogenous Metabolites		C09712		6754-20-7		mzCloud	2	pos	2.80789e+06	2.46312e+06	2.37095e+06	2.1333e+06
M249T50	Pindolol	249.155	49.6	248.153	19.5702	C14H20N2O2	[M+H]+	Indoles and derivatives	Indoles	C07445		13523-86-9	HMDB0015095	mzCloud	2	pos	7.04265e+07	6.09179e+07	9.22908e+07	6.78202e+07
M297T464	12,13-DHOME	297.242	464.3	314.246	12.2257	C18H34O4	[M+H-H2O]+	Fatty Acyls	Fatty acids and conjugates	C14829	Lipid metabolism		HMDB0004705	mzCloud	2	pos	1.04318e+07	8.64978e+06	8.87546e+06	7.12337e+06
M298T648	Tridemorph	298.31	648.1	297.303	1.26043	C19H39NO	[M+H]+	Oxazinanes	Morpholines	C11285		c("24602-86-6", "81412-43-3", "NA")	HMDB0031810	mzCloud	2	pos	4.88198e+06	1.14159e+07	1.11071e+07	6.93024e+06
M318T403	Phytosphingosine	318.302	402.7	317.293	5.10207	C18H39NO3	[M+H]+	Organonitrogen compounds	Amines	C12144	Lipid metabolism	554-62-1	HMDB0004610	mzCloud	2	pos	2.33991e+08	6.55938e+08	4.47218e+08	5.69064e+08
M326T601	Oleoylethanolamide	326.306	600.8	325.298	0.992934	C20H39NO2	[M+H]+	Organonitrogen compounds	Amines	C20792	Signal transduction	111-58-0	HMDB0002088	mzCloud	2	pos	8.36753e+06	9.57333e+06	3.39751e+07	1.37578e+07
M310T530	N,N-Dimethylsphing-4-enine	310.31	530	327.314	11.3886	C20H41NO2	[M+H-H2O]+	Organonitrogen compounds	Amines	C13914		c("122314-67-4", "119567-63-4")	HMDB0013645	mzCloud	2	pos	4.27545e+07	6.53118e+07	2.03529e+07	6.36429e+07
M348T50	AMP	348.075	50.1	347.063	13.2845	C10H14N5O7P	[M+H]+	Purine nucleotides	Purine ribonucleotides	C00020	Endocrine and metabolic disease; Sensory system; Signal transduction; Endocrine system; Neurodegenerative disease; Nucleotide metabolism; Aging	61-19-8	HMDB0000045	mzCloud	2	pos	2.0202e+07	5.32512e+06	5.72887e+06	4.78818e+06
M102T402	(S)-Methylmalonic acid semialdehyde	102.034	402.4	102.032	4.98589	C4H6O3	[M]+	Organooxygen compounds	Carbonyl compounds	C06002	Carbohydrate metabolism; Amino acid metabolism	99043-16-0	HMDB0002217	BioDeepDB	2	pos	1.77504e+07	1.92299e+07	1.46561e+07	2.19547e+07
M104T71	2-Hydroxybutyric acid	104.053	71.2	104.047	1.81501	C4H8O3	[M]+	Hydroxy acids and derivatives	Alpha hydroxy acids and derivatives	C05984	Carbohydrate metabolism	600-15-7 / 3347-90-8	HMDB0000008	BioDeepDB	2	pos	3.76587e+07	2.75855e+07	2.90713e+07	3.70991e+07
M115T156	epsilon-Caprolactone	115.076	155.5	114.068	1.07755	C6H10O2	[M+H]+	Lactones		C01880		502-44-3	HMDB0060476	BioDeepDB	2	pos	3.68812e+06	3.08077e+06	2.39165e+06	2.92684e+06
M119T187	5-Hydroxypentanoic acid	119.073	187	118.063	23.7165	C5H10O3	[M+H]+	Fatty Acyls	Fatty acids and conjugates	C02804		13392-69-3	HMDB0061927	BioDeepDB	2	pos	1.75272e+06	1.72685e+06	4.09914e+06	4.19313e+06
M130T41_2	Mesaconate	130.017	41.2	130.027	0.0518262	C5H6O4	[M]+			C01732	Carbohydrate metabolism	498-24-8		BioDeepDB	2	pos	1.30182e+08	7.84763e+07	1.22006e+08	1.25474e+08
M130T478	Pyroglutamic acid	130.049	477.9	129.043	8.98365	C5H7NO3	[M+H]+	Carboxylic acids and derivatives	Amino acids, peptides, and analogues	C01879	Metabolism of other amino acids	98-79-3	HMDB0000267	BioDeepDB	2	pos	3.77736e+07	4.23169e+07	1.90611e+07	2.87861e+07
M132T179	3-Methylindole	132.081	179	131.073	0.430832	C9H9N	[M+H]+	Indoles and derivatives	Indoles	C08313	Amino acid metabolism	83-34-1	HMDB0000466	BioDeepDB	2	pos	7.4361e+06	5.40523e+06	9.06965e+06	8.98848e+06
M133T330	6-Hydroxyhexanoic acid	133.086	330.1	132.079	2.43451	C6H12O3	[M+H]+	Hydroxy acids and derivatives	Medium-chain hydroxy acids and derivatives	C06103		1191-25-9	HMDB0012843	BioDeepDB	2	pos	618524	508725	530338	513690
M133T54	5,6-Dihydro-5-fluorouracil	133.032	54	132.034	0.0659202	C4H5FN2O2	[M+H]+	Diazines	Pyrimidines and pyrimidine derivatives	C16630	Xenobiotics biodegradation and metabolism	696-06-0	HMDB0060402	BioDeepDB	2	pos	3.71423e+07	2.1663e+07	2.50497e+07	4.16066e+07
M135T471	Chavicol	135.081	471.1	134.073	0.00414035	C9H10O	[M+H]+	Phenols	1-hydroxy-2-unsubstituted benzenoids	C16930		501-92-8	HMDB0034107	BioDeepDB	2	pos	1.35894e+06	8.07861e+06	1.10172e+07	5.27848e+06
M140T168	Acetylphosphate	139.981	168.2	139.988	4.72168	C2H5O5P	[M]+	Organic phosphoric acids and derivatives	Phosphate esters	C00227	Carbohydrate metabolism; Metabolism of other amino acids	590-54-5	HMDB0001494	BioDeepDB	2	pos	1.61733e+07	1.67225e+07	1.6225e+07	1.60998e+07
M146T50	Acetylcholine	146.118	50	146.118	0.0782401	C7H16NO2	[M]+	Organonitrogen compounds	Quaternary ammonium salts	C01996	Nervous system; Signal transduction; Sensory system; Endocrine system; Digestive system; Lipid metabolism; Neurodegenerative disease; Signaling molecules and interaction; Substance dependence; Cell motility	51-84-3	HMDB0000895	BioDeepDB	2	pos	1.69943e+07	1.6857e+07	1.81464e+07	1.72348e+07
M147T58	(3S,5S)-3,5-Diaminohexanoate	147.113	57.9	146.106	2.03518	C6H14N2O2	[M+H]+	Carboxylic acids and derivatives	Amino acids, peptides, and analogues	C01186	Amino acid metabolism	17027-83-7	HMDB0012115	BioDeepDB	2	pos	2.09267e+07	1.31986e+07	1.42804e+07	1.64084e+07
M153T72	FAPy-adenine	153.066	71.6	153.065	0.507449	C5H7N5O	[M]+	Diazines	Pyrimidines and pyrimidine derivatives	C06502		5122-36-1	HMDB0004816	BioDeepDB	2	pos	2.58218e+07	2.35915e+07	2.38722e+07	2.51443e+07
M160T179_1	Indoleacetaldehyde	160.076	179.3	159.068	0.946334	C10H9NO	[M+H]+	Indoles and derivatives	Indoles	C00637	Amino acid metabolism	2591-98-2	HMDB0001190	BioDeepDB	2	pos	9.19027e+06	5.52759e+06	5.13308e+06	5.77787e+06
M162T80	L-Rhamnono-1,4-lactone	162.059	80.3	162.053	4.71442	C6H10O5	[M]+			C02991	Carbohydrate metabolism			BioDeepDB	2	pos	9.33414e+06	6.61804e+06	7.45377e+06	7.62477e+06
M163T550	2-Deoxystreptamine	163.112	549.8	162.1	0.00311891	C6H14N2O3	[M+H]+			C02627	Biosynthesis of other secondary metabolites	2037-48-1		BioDeepDB	2	pos	2.81781e+06	5.20718e+06	3.06222e+06	3.51492e+06
M166T62	4-Hydroxyphenylglyoxylate	166.026	62.2	166.027	1.20463	C8H6O4	[M]+			C03590		15573-67-8		BioDeepDB	2	pos	2.59037e+07	2.59783e+07	2.69993e+07	2.60861e+07
M167T272	Perillic acid	167.107	272.4	166.099	1.83414	C10H14O2	[M+H]+	Prenol lipids	Monoterpenoids	C11924		7694-45-3	HMDB0004586	BioDeepDB	2	pos	1.18172e+06	1.739e+06	2.65595e+06	1.68573e+06
M169T48	(R)-4-Hydroxymandelate	169.059	48.2	168.042	0.271768	C8H8O4	[M+H]+			C05343				BioDeepDB	2	pos	1.84763e+07	1.86861e+07	2.00566e+07	1.8571e+07
M188T270	8-Amino-7-oxononanoate	188.129	269.9	187.121	0.0267015	C9H17NO3	[M+H]+			C01092	Metabolism of cofactors and vitamins	4707-58-8		BioDeepDB	2	pos	7.2837e+06	7.79204e+06	4.17631e+06	1.03205e+06
M172T267	N-Butyryl-L-homoserine lactone	172.097	266.6	171.089	0.57676	C8H13NO3	[M+H]+			C11837		67605-85-0		BioDeepDB	2	pos	1.1232e+07	4.78758e+06	2.89437e+06	4.40773e+06
M173T76	2-Oxoarginine	173.078	76.5	173.08	0.18869	C6H11N3O3	[M]+	Keto acids and derivatives	Short-chain keto acids and derivatives	C03771	Amino acid metabolism	3715-10-4	HMDB0004225	BioDeepDB	2	pos	1.7356e+07	1.93211e+07	1.75692e+07	1.0253e+07
M174T65	cis-Aconitic acid	174.012	65.4	174.016	22.9869	C6H6O6	[M]+	Carboxylic acids and derivatives	Tricarboxylic acids and derivatives	C00417	Carbohydrate metabolism	585-84-2 / 499-12-7	HMDB0000072	BioDeepDB	2	pos	2.8713e+07	3.95791e+07	3.41155e+07	3.8243e+07
M176T124	D-Alanyl-D-serine	176.075	124.4	176.08	3.32795	C6H12N2O4	[M]+			C19719				BioDeepDB	2	pos	3.2069e+06	1.97939e+06	1.95066e+06	2.33738e+06
M194T287	3,4-Methylenedioxyamphetamine	194.115	287	193.11	0.0182566	C11H15NO2	[M+H]+	Benzodioxoles		C07577		4764-17-4 / 42542-10-9	HMDB0041931	BioDeepDB	2	pos	2.48592e+07	2.57906e+07	2.17866e+07	2.57588e+07
M195T384	Neocnidilide	195.139	384.1	194.131	2.4127	C12H18O2	[M+H]+	Lactones	Gamma butyrolactones	C17002		4567-33-3	HMDB0034450	BioDeepDB	2	pos	6.08659e+06	3.5709e+06	5.42295e+06	3.06978e+06
M179T456	Methyleugenol	179.107	455.9	178.099	0.0135353	C11H14O2	[M+H]+	Benzene and substituted derivatives	Methoxybenzenes	C10454		93-15-2	HMDB0031864	BioDeepDB	2	pos	1.48401e+07	1.07966e+07	8.21245e+07	6.81128e+07
M181T409	L-Sorbose	181.086	408.7	180.063	3.0596	C6H12O6	[M+H]+			C00247	Carbohydrate metabolism	87-79-6		BioDeepDB	2	pos	3.90479e+06	772161	2.12621e+06	4.6027e+06
M183T584	Se-Methylselenocysteine	182.985	584.5	182.98	0.285315	C4H9NO2Se	[M]+	Carboxylic acids and derivatives	Amino acids, peptides, and analogues	C05689	Metabolism of other amino acids	26046-90-2 / 2574-71-2 / NA	HMDB0004113	BioDeepDB	2	pos	5.46569e+07	3.14737e+07	4.62725e+07	2.72086e+07
M188T179	3-Indoleacrylate	188.071	179	187.063	0.246056	C11H9NO2	[M+H]+			C21283				BioDeepDB	2	pos	3.28449e+09	1.4382e+09	1.36423e+09	1.54204e+09
M190T398	L-2-Amino-6-oxoheptanedioate	190.087	398.1	189.064	0.0775584	C7H11NO5	[M+H]+			C03871		75650-93-0		BioDeepDB	2	pos	2.34177e+06	690666	781843	496952
M202T187	Thiabendazole	202.045	187	201.036	0.386984	C10H7N3S	[M+H]+	Benzimidazoles		C07131		148-79-8	HMDB0014868	BioDeepDB	2	pos	1.35914e+09	1.94374e+09	1.15548e+09	1.39995e+09
M224T389	2-Acetamidofluorene	224.092	389.2	223.1	0.322617	C15H13NO	[M+H]+			C02778		53-96-3 / 27215-65-2		BioDeepDB	2	pos	2.61476e+07	9.23964e+06	3.85175e+06	2.13357e+07
M209T379	Anhalamine	209.118	378.7	209.105	2.46448	C11H15NO3	[M]+			C12231				BioDeepDB	2	pos	2.23108e+06	1.53334e+06	332776	2.3416e+06
M213T385	Dodecanedioic acid	213.149	384.5	230.152	12.2811	C12H22O4	[M+H-H2O]+	Fatty Acyls	Fatty acids and conjugates	C02678		693-23-2	HMDB0000623	BioDeepDB	2	pos	6.58146e+06	3.17493e+06	3.18408e+06	5.50008e+06
M219T266	N-Acetylserotonin	219.113	266.1	218.106	3.04037	C12H14N2O2	[M+H]+	Indoles and derivatives	Hydroxyindoles	C00978	Amino acid metabolism	1210-83-9	HMDB0001238	BioDeepDB	2	pos	1.26338e+06	1.1256e+06	1.10767e+06	1.19444e+06
M221T79	Pyrimidodiazepine	221.092	79.2	221.091	1.27121	C9H11N5O2	[M]+			C02587	Metabolism of cofactors and vitamins			BioDeepDB	2	pos	4.10133e+06	2.18402e+06	3.55917e+06	3.29584e+06
M226T495	2-Amino-2-deoxyisochorismate	226.069	495	225.064	0.469293	C10H11NO5	[M+H]+			C18054				BioDeepDB	2	pos	4.42827e+06	2.37152e+06	1.67639e+06	2.95392e+06
M245T81	beta-Alanyl-L-arginine	245.15	80.8	245.149	0.370568	C9H19N5O3	[M]+	Peptidomimetics	Hybrid peptides	C05340	Metabolism of other amino acids		HMDB0060441	BioDeepDB	2	pos	2.32353e+06	2.99822e+06	2.58833e+06	2.95222e+06
M232T138	Butyryl-L-carnitine	232.155	137.7	231.147	0.00309994	C11H21NO4	[M+H]+			C02862		25576-40-3	HMDB02013	BioDeepDB	2	pos	2.24843e+07	1.66984e+07	5.0724e+06	2.45353e+06
M233T286	N6-Acetyl-LL-2,6-diaminoheptanedioate	233.092	285.8	232.106	1.30036	C9H16N2O5	[M+H]+			C04390				BioDeepDB	2	pos	248318	266290	265576	169040
M235T554	Confertifolin	235.17	554.2	234.162	0.162274	C15H22O2	[M+H]+			C09376		1811-23-0		BioDeepDB	2	pos	9.44567e+06	9.29009e+06	9.61318e+06	9.32205e+06
M258T59	Glycerophosphocholine	258.111	58.7	258.111	0.387431	C8H21NO6P	[M]+	Glycerophospholipids	Glycerophosphocholines	C00670	Lipid metabolism; Cancer: overview	28319-77-9	HMDB0000086	BioDeepDB	2	pos	1.26087e+07	1.74487e+07	3.18282e+07	1.31124e+07
M276T72	4-Hydroxycinnamoylagmatine	276.143	71.6	276.159	2.15575	C14H20N4O2	[M]+	Cinnamic acids and derivatives	Hydroxycinnamic acids and derivatives	C04498	Amino acid metabolism	7295-86-5	HMDB0033460	BioDeepDB	2	pos	8.62414e+07	8.71969e+07	9.79364e+07	6.23906e+07
M265T243	5'-Dehydroadenosine	265.097	242.6	265.081	0.357713	C10H11N5O4	[M]+			C11500		3110-98-3		BioDeepDB	2	pos	2.1215e+06	441770	1.48526e+06	1.64548e+06
M269T619	Retinol	269.227	619	286.23	0.00746679	C20H30O	[M+H-H2O]+			C00473	Metabolism of cofactors and vitamins; Digestive system	68-26-8 11103-57-4 / 11103-57-4 / 68-26-8		BioDeepDB	2	pos	4.83438e+07	3.3943e+07	5.93572e+07	3.9446e+07
M276T508	Homatropine	276.16	507.8	275.152	0.00280107	C16H21NO3	[M+H]+			C07814		87-00-3		BioDeepDB	2	pos	434831	2.66177e+06	2.15516e+06	579918
M280T501	3-Ketosphingosine	280.263	501.4	297.267	13.3232	C18H35NO2	[M+H-H2O]+			C06121				BioDeepDB	2	pos	6.02326e+06	5.544e+06	4.67468e+06	4.47628e+06
M281T525	10E,12Z-Octadecadienoic acid	281.247	525.1	280.24	0.00052456	C18H32O2	[M+H]+	Fatty Acyls	Lineolic acids and derivatives	C04056	Lipid metabolism	2420-56-6	HMDB0005048	BioDeepDB	2	pos	3.11264e+07	3.77716e+06	2.14118e+07	3.00887e+07
M282T649	Sphingosine	282.279	648.6	299.282	0.354455	C18H37NO2	[M+H-H2O]+	Organonitrogen compounds	Amines	C00319	Lipid metabolism; Cell growth and death; Signal transduction	123-78-4	HMDB0000252	BioDeepDB	2	pos	1.06041e+07	1.40831e+07	1.61525e+07	1.16516e+07
M286T619	9-cis-Retinol	286.229	619	286.23	1.74685	C20H30O	[M]+			C16682	Metabolism of cofactors and vitamins	22737-97-9		BioDeepDB	2	pos	2.23925e+06	1.00095e+07	2.93483e+06	694772
M295T228	Aspartame	295.128	227.7	294.122	0.398684	C14H18N2O5	[M+H]+	Carboxylic acids and derivatives	Amino acids, peptides, and analogues	C11045	Sensory system	22839-47-0	HMDB0001894	BioDeepDB	2	pos	2.04518e+07	3.08218e+07	2.68667e+07	2.23314e+07
M296T47	Dehypoxanthine futalosine	296.066	47.1	296.09	0.389405	C14H16O7	[M]+			C17010	Metabolism of cofactors and vitamins			BioDeepDB	2	pos	4.90616e+07	6.30507e+07	2.27656e+07	6.33874e+07
M314T340	Pergolide	314.183	340.3	314.182	1.21724	C19H26N2S	[M]+	Quinolines and derivatives	Indoloquinolines	C07425		66104-22-1	HMDB0015317	BioDeepDB	2	pos	2.77196e+06	1.18325e+06	996860	1.45997e+06
M299T364	Metoclopramide	299.139	363.7	299.14	3.00863	C14H22ClN3O2	[M]+	Phenol ethers	Aminophenyl ethers	C07868		364-62-5	HMDB0015363	BioDeepDB	2	pos	1.41096e+06	130170	475453	923543
M299T449	Norethindrone	299.2	448.6	298.193	0.0721324	C20H26O2	[M+H]+	Steroids and steroid derivatives	Estrane steroids	C05028		68-22-4	HMDB0014855	BioDeepDB	2	pos	649249	1.42763e+06	1.65398e+06	1.15027e+06
M301T506	9-cis-Retinoic acid	301.216	506.1	300.209	0.000486308	C20H28O2	[M+H]+	Prenol lipids	Retinoids	C15493	Cancer: overview; Metabolism of cofactors and vitamins; Endocrine system; Cancer: specific types; Immune system	5300-03-8	HMDB0002369	BioDeepDB	2	pos	9.80058e+06	1.04858e+07	1.20785e+07	9.00974e+06
M305T541	Arachidonic acid	305.247	541.1	304.24	0.626235	C20H32O2	[M+H]+	Fatty Acyls	Fatty acids and conjugates	C00219	Circulatory system; Cell growth and death; Nervous system; Sensory system; Endocrine system; Lipid metabolism; Immune system; Infectious disease: parasitic	506-32-1	HMDB0001043	BioDeepDB	2	pos	7.90579e+06	1.9111e+06	1.50272e+06	1.75433e+06
M316T382	Decanoyl-L-carnitine	316.249	382.4	315.241	0.268806	C17H33NO4	[M+H]+			C03299		3992-45-8	HMDB00651	BioDeepDB	2	pos	4.75382e+06	1.67136e+06	1.48118e+06	1.58615e+06
M338T235	2,5-Diamino-6-(5-phospho-D-ribitylamino)pyrimidin-4(3H)-one	338.087	235.3	355.089	14.8897	C9H18N5O8P	[M+H-H2O]+			C18910	Metabolism of cofactors and vitamins			BioDeepDB	2	pos	3.6012e+06	3.16636e+06	2.92408e+06	3.87959e+06
M361T305	Nitrendipine	361.139	304.8	360.132	0.0438936	C18H20N2O6	[M+H]+	Pyridines and derivatives	Hydropyridines	C07713		39562-70-4 / 84845-75-0	HMDB0015187	BioDeepDB	2	pos	2.93001e+06	2.44422e+06	2.65403e+06	2.54367e+06
M400T487_2	Palmitoyl-L-carnitine	400.342	487.3	399.335	0.00304915	C23H45NO4	[M+H]+			C02990	Lipid metabolism	2364-67-2		BioDeepDB	2	pos	4.19093e+08	2.87998e+08	2.127e+08	3.59154e+08
M413T209	6-Amino-6-deoxyfutalosine	413.141	209.4	413.134	18.8797	C19H19N5O6	[M]+			C20773	Metabolism of cofactors and vitamins			BioDeepDB	2	pos	2.97822e+06	1.85434e+06	1.2442e+06	1.47268e+06
M431T520	2,22-Dideoxy-3-dehydroecdysone	431.314	520.2	430.308	3.8858	C27H42O4	[M+H]+			C16498				BioDeepDB	2	pos	1.61604e+07	1.58675e+07	5.31426e+07	1.12372e+07
M482T562_2	Antibiotic JI-20A	482.323	561.7	481.275	2.51572	C19H39N5O9	[M+H]+			C17704	Biosynthesis of other secondary metabolites	51846-97-0		BioDeepDB	2	pos	9.05376e+08	8.34735e+08	6.51231e+08	2.49276e+09
M464T353_1	3-Epiecdysone	464.281	352.8	464.314	2.46811	C27H44O6	[M]+			C16496				BioDeepDB	2	pos	3.47483e+06	2.16515e+06	2.99509e+06	2.01287e+06
M476T467	Retinoyl b-glucuronide	476.282	466.8	476.241	10.5218	C26H36O8	[M]+	Prenol lipids	Terpene glycosides	C11061	Metabolism of cofactors and vitamins	401-10-5	HMDB0003141	BioDeepDB	2	pos	3.99202e+07	2.89414e+07	2.77536e+07	3.24022e+07
M480T319	26-Hydroxyecdysone	480.287	319.4	480.309	18.8734	C27H44O7	[M]+			C16499		52717-49-4		BioDeepDB	2	pos	1.02439e+06	775816	768978	946050
M553T486_1	8,12-Diethyl-3-vinylbacteriochlorophyllide d	553.246	485.7	570.248	9.46053	C34H34MgN4O3	[M+H-H2O]+			C21427	Metabolism of cofactors and vitamins			BioDeepDB	2	pos	5.38839e+06	332165	806495	955154
M570T514_2	Avermectin B1b aglycone	570.358	513.7	570.319	3.50515	C33H46O8	[M]+			C11963				BioDeepDB	2	pos	2.37363e+08	2.91908e+08	2.06744e+08	1.62489e+08
M567T491_1	Avermectin A1b aglycone	567.32	490.5	584.335	13.1601	C34H48O8	[M+H-H2O]+			C11964				BioDeepDB	2	pos	1.71328e+07	2.42112e+07	3.25758e+07	1.41461e+07
M130T245	(S)-3-Methyl-2-oxopentanoic acid	130.067	245.3	130.063	27.6789	C6H10O3	[M]-	Carboxylic acids and derivatives	Alpha-keto acids and derivatives	C00671	Amino acid metabolism			MetaDNA	2	neg	147603	917115	172020	1.39398e+06
M260T96_1	Mannose 6-phosphate	260.024	95.9	260.03	22.6897	C6H13O9P	[M]-	Organic oxides	Alcohols and polyols	C00275	Carbohydrate metabolism; Transport and catabolism	3672-15-9/NA	HMDB0001078	MetaDNA	2	neg	484289	218442	470150	305055
M163T194	Enol-phenylpyruvate	163.04	193.7	164.047	2.30618	C9H8O3	[M-H]-	Benzene and substituted derivatives	Carbonyl compounds	C02763	Amino acid metabolism	5801-57-0	HMDB0012225	MetaDNA	2	neg	1.40254e+06	697921	642702	682061
M180T54	(S)-beta-Tyrosine	180.067	53.6	181.074	1.53277	C9H11NO3	[M-H]-			C21308				MetaDNA	2	neg	5.50994e+07	5.8246e+07	1.83312e+06	6.76547e+07
M283T386	Xanthosine	283.068	386.3	284.076	2.91096	C10H12N4O6	[M-H]-	Azacyclic compounds	Alcohols and polyols	C01762	Membrane transport; Biosynthesis of other secondary metabolites; Nucleotide metabolism	146-80-5	HMDB0000299	MetaDNA	2	neg	1.16963e+07	2.89628e+06	2.67632e+06	1.60904e+06
M128T72_1	Ammelide	128.036	72	128.033	17.183	C3H4N4O2	[M]-	Azacyclic compounds	1,3,5-triazines	C08734		645-93-2		MetaDNA	2	neg	3.68572e+06	2.63908e+06	3.42457e+06	2.27687e+06
M270T481	16-Oxopalmitate	270.216	480.6	270.219	11.4722	C16H30O3	[M]-			C19614				MetaDNA	2	neg	5.15414e+06	2.12462e+06	3.29518e+06	1.52415e+06
M271T134	N2-Malonyl-D-tryptophan	271.07	133.6	290.09	5.57048	C14H14N2O5	[M-H2O-H]-	Azacyclic compounds	Amino acids, peptides, and analogues	C03414				MetaDNA	2	neg	1.84005e+07	7.28014e+06	3.59575e+06	1.12646e+07
M179T76	2-Hydroxy-3-(4-hydroxyphenyl)propenoic acid	179.036	76.1	180.042	3.7758	C9H8O4	[M-H]-	Benzene and substituted derivatives	1-hydroxy-2-unsubstituted benzenoids	C05350	Amino acid metabolism		HMDB0006915	MetaDNA	2	neg	6.66629e+06	2.67473e+06	4.81931e+06	2.88427e+06
M103T116	Malonate	102.957	116.2	104.011	14.8293	C3H4O4	[M-H]-			C00383	Lipid metabolism; Metabolism of other amino acids; Nucleotide metabolism	141-82-2 / 156-80-9		BioDeepDB	2	neg	2.7519e+06	8.15651e+06	5.63777e+06	5.49673e+06
M114T69	Dihydrouracil	113.989	69.2	114.043	14.2248	C4H6N2O2	[M]-	Diazines	Pyrimidines and pyrimidine derivatives	C00429	Metabolism of cofactors and vitamins; Metabolism of other amino acids; Nucleotide metabolism	504-07-4	HMDB0000076	BioDeepDB	2	neg	3.95841e+06	3.78194e+06	3.8165e+06	3.80457e+06
M115T44	Fumaric acid	115.004	44	116.011	2.39992	C4H4O4	[M-H]-	Carboxylic acids and derivatives	Dicarboxylic acids and derivatives	C00122	Cancer: overview; Metabolism of cofactors and vitamins; Endocrine system; Carbohydrate metabolism; Cancer: specific types; Amino acid metabolism; Energy metabolism	110-17-8	HMDB0000134	BioDeepDB	2	neg	6.8759e+06	1.40596e+07	1.52848e+07	2.24858e+07
M117T179	5-Aminopentanoic acid	116.929	178.9	117.079	12.5956	C5H11NO2	[M]-	Carboxylic acids and derivatives	Amino acids, peptides, and analogues	C00431	Amino acid metabolism	660-88-8	HMDB0003355	BioDeepDB	2	neg	1.30327e+06	915647	974306	1.07882e+06
M116T52	L-Valine	116.072	52.4	117.079	2.37783	C5H11NO2	[M-H]-	Carboxylic acids and derivatives	Amino acids, peptides, and analogues	C00183	Cancer: overview; Metabolism of cofactors and vitamins; Membrane transport; Digestive system; Translation; Amino acid metabolism	72-18-4	HMDB0000883	BioDeepDB	2	neg	3.63325e+07	2.89729e+07	2.37981e+07	2.96665e+07
M117T684	Methylmalonic acid	116.929	684.4	118.027	13.9711	C4H6O4	[M-H]-	Carboxylic acids and derivatives	Dicarboxylic acids and derivatives	C02170	Carbohydrate metabolism; Amino acid metabolism; Nucleotide metabolism	516-05-2	HMDB0000202	BioDeepDB	2	neg	2.15066e+08	1.69001e+07	1.11227e+07	1.09536e+08
M121T268	Erythritol	121.03	268.4	122.058	12.3035	C4H10O4	[M-H]-			C00503	Membrane transport	149-32-6		BioDeepDB	2	neg	9.85263e+06	3.99178e+06	3.42954e+06	1.32215e+06
M130T54	L-Isoleucine	130.088	54.1	131.095	1.35294	C6H13NO2	[M-H]-	Carboxylic acids and derivatives	Amino acids, peptides, and analogues	C00407	Cancer: overview; Membrane transport; Digestive system; Translation; Amino acid metabolism	73-32-5	HMDB0000172	BioDeepDB	2	neg	3.27204e+07	1.88018e+07	2.30344e+07	2.29843e+07
M133T44	L-Malic acid	133.015	44	134.022	3.57855	C4H6O5	[M-H]-	Hydroxy acids and derivatives	Beta hydroxy acids and derivatives	C00149	Cancer: overview; Sensory system; Excretory system; Endocrine system; Carbohydrate metabolism; Cancer: specific types	97-67-6 / 6915-15-7	HMDB0000156	BioDeepDB	2	neg	1.7977e+08	1.77996e+08	1.38189e+08	1.71e+08
M136T684	Phenyl acetate	135.971	683.7	136.052	12.1329	C8H8O2	[M]-			C00548		122-79-2		BioDeepDB	2	neg	1.87535e+07	1.7233e+07	1.74338e+07	2.03109e+07
M136T653	Phenylacetic acid	135.971	652.6	136.052	12.4696	C8H8O2	[M]-	Benzene and substituted derivatives		C07086	Amino acid metabolism	103-82-2	HMDB0000209	BioDeepDB	2	neg	4.67703e+06	1.69295e+07	1.55684e+07	3.78175e+06
M159T104	Oxoadipic acid	158.979	104.1	160.037	10.9653	C6H8O5	[M-H]-	Keto acids and derivatives	Medium-chain keto acids and derivatives	C00322	Amino acid metabolism	3184-35-8	HMDB0000225	BioDeepDB	2	neg	1.73658e+06	506934	2.44074e+06	2.53875e+06
M144T113	Spermidine	143.916	112.5	145.158	8.9885	C7H19N3	[M-H]-	Organonitrogen compounds	Amines	C00315	Amino acid metabolism; Membrane transport; Metabolism of other amino acids; Digestive system	124-20-9	HMDB0001257	BioDeepDB	2	neg	1.88167e+07	4.59775e+06	1.5275e+07	1.74709e+07
M145T44	Oxoglutaric acid	145.014	44.3	146.022	1.21367	C5H6O5	[M-H]-	Keto acids and derivatives	Gamma-keto acids and derivatives	C00026	Metabolism of other amino acids; Signal transduction; Nervous system; Endocrine system; Excretory system; Carbohydrate metabolism; Amino acid metabolism	328-50-7 / 64-15-3	HMDB0000208	BioDeepDB	2	neg	2.44156e+07	2.97658e+07	4.06228e+07	1.1417e+07
M146T53	L-Glutamic acid	146.083	52.7	147.053	29.2755	C5H9NO4	[M-H]-	Carboxylic acids and derivatives	Amino acids, peptides, and analogues	C00025	Neurodegenerative disease; Biosynthesis of other secondary metabolites; Translation; Substance dependence; Cellular community - eukaryotes; Energy metabolism; Metabolism of other amino acids; Excretory system; Carbohydrate metabolism; Cancer: overview; Membrane transport; Cell growth and death; Signal transduction; Nervous system; Digestive system; Environmental adaptation; Amino acid metabolism;…	56-86-0	HMDB0000148	BioDeepDB	2	neg	6.94498e+06	3.99073e+06	4.20674e+06	4.67982e+06
M165T372	3-(2-Hydroxyphenyl)propanoic acid	165.056	372.4	166.063	4.09557	C9H10O3	[M-H]-	Phenylpropanoic acids		C01198	Amino acid metabolism	495-78-3	HMDB0033752	BioDeepDB	2	neg	508205	531387	723798	617574
M148T72	L-Methionine	148.044	71.6	149.051	0.162114	C5H11NO2S	[M-H]-	Carboxylic acids and derivatives	Amino acids, peptides, and analogues	C00073	Cancer: overview; Amino acid metabolism; Digestive system; Translation	63-68-3	HMDB0000696	BioDeepDB	2	neg	5.89669e+06	2.35178e+07	2.58578e+07	1.33197e+07
M149T547	D-Xylose	149.01	546.7	150.053	13.0528	C5H10O5	[M-H]-	Organooxygen compounds	Carbohydrates and carbohydrate conjugates	C00181	Carbohydrate metabolism; Membrane transport	58-86-6	HMDB0000098	BioDeepDB	2	neg	5.38531e+06	3.16175e+06	4.43641e+06	4.96245e+06
M152T381	3-Hydroxyanthranilic acid	152.036	381	153.043	1.81536	C7H7NO3	[M-H]-	Benzene and substituted derivatives	Benzoic acids and derivatives	C00632	Amino acid metabolism	548-93-6	HMDB0001476	BioDeepDB	2	neg	4.17603e+06	2.37768e+06	1.42451e+06	1.93179e+06
M154T680	4-Quinolinecarboxylic acid	153.993	679.9	173.048	11.7948	C10H7NO2	[M-H2O-H]-			C06414		486-74-8		BioDeepDB	2	neg	1.89885e+07	9.00476e+06	1.0554e+07	1.84782e+07
M163T272	Phenylpyruvic acid	163.04	272	164.047	2.30618	C9H8O3	[M-H]-	Benzene and substituted derivatives	Phenylpyruvic acid derivatives	C00166	Amino acid metabolism	156-06-9	HMDB0000205	BioDeepDB	2	neg	597516	635147	333847	593193
M165T689	Phthalic acid	165.041	689.5	166.027	6.56301	C8H6O4	[M-H]-	Benzene and substituted derivatives	Benzoic acids and derivatives	C01606	Membrane transport	88-99-3 / 3198-29-6	HMDB0002107	BioDeepDB	2	neg	1.64995e+06	1.28574e+06	1.59007e+06	1.44035e+06
M165T330	3-Methylxanthine	165.093	329.7	166.049	14.9556	C6H6N4O2	[M-H]-	Imidazopyrimidines	Purines and purine derivatives	C16357	Biosynthesis of other secondary metabolites	1076-22-8	HMDB0001886	BioDeepDB	2	neg	501458	584976	960098	811014
M187T72_2	Azelaic acid	187.098	71.7	188.105	0.128275	C9H16O4	[M-H]-	Fatty Acyls	Fatty acids and conjugates	C08261		123-99-9	HMDB0000784	BioDeepDB	2	neg	1.63312e+07	8.88632e+06	6.87515e+06	1.0103e+07
M191T91	Citric acid	191.02	90.8	192.027	1.96838	C6H8O7	[M-H]-	Carboxylic acids and derivatives	Tricarboxylic acids and derivatives	C00158	Cancer: overview; Sensory system; Endocrine system; Carbohydrate metabolism; Amino acid metabolism	77-92-9 / 126-44-3	HMDB0000094	BioDeepDB	2	neg	4.31828e+06	3.40329e+06	2.79612e+06	3.54412e+06
M192T148	Phenylacetylglycine	192.067	147.5	193.074	2.4783	C10H11NO3	[M-H]-	Carboxylic acids and derivatives	Amino acids, peptides, and analogues	C05598	Amino acid metabolism	500-98-1	HMDB0000821	BioDeepDB	2	neg	3.28155e+07	2.90326e+07	2.63361e+07	3.12054e+07
M179T337	Vanillylmandelic acid	179.036	337.4	198.053	8.32235	C9H10O5	[M-H2O-H]-	Phenols	Methoxyphenols	C05584	Amino acid metabolism	55-10-7	HMDB0000291	BioDeepDB	2	neg	488067	127100	498192	607375
M179T103	D-Fructose	179.056	103.1	180.063	1.25101	C6H12O6	[M-H]-			C00095	Endocrine and metabolic disease; Membrane transport; Sensory system; Digestive system; Carbohydrate metabolism	57-48-7		BioDeepDB	2	neg	3.11946e+06	2.3082e+06	4.75056e+06	3.17069e+06
M205T419	3-Oxalomalate	205.015	419.1	206.006	7.65308	C6H6O8	[M-H]-			C01990	Carbohydrate metabolism	3687-15-8 / 89304-26-7		BioDeepDB	2	neg	711612	357974	431573	1.02483e+06
M191T104	Quinate	190.929	103.8	192.063	6.06934	C7H12O6	[M-H]-			C00296	Amino acid metabolism	77-95-2		BioDeepDB	2	neg	1.11997e+06	1.0518e+06	730283	1.55399e+06
M194T467	Methyl beta-D-galactoside	194.083	467.3	194.079	4.60273	C7H14O6	[M]-			C03619	Membrane transport	1824-94-8		BioDeepDB	2	neg	2.6257e+06	1.50985e+06	3.47387e+06	6.36115e+06
M195T45_2	Gluconic acid	195.051	45.4	196.058	0.123045	C6H12O7	[M-H]-	Organooxygen compounds	Carbohydrates and carbohydrate conjugates	C00257	Carbohydrate metabolism	526-95-4	HMDB0000625	BioDeepDB	2	neg	1.92193e+07	2.34975e+07	1.13187e+07	5.06577e+07
M213T554	Tridecanoic acid	213.186	554.3	214.193	1.29464	C13H26O2	[M-H]-	Fatty Acyls	Fatty acids and conjugates	C17076		638-53-9	HMDB0000910	BioDeepDB	2	neg	2.74055e+06	3.76388e+06	2.78674e+06	4.5778e+06
M205T549	Methyl jasmonate	205.16	548.5	224.141	3.76348	C13H20O3	[M-H2O-H]-	Fatty Acyls	Lineolic acids and derivatives	C11512	Lipid metabolism	1211-29-6 / 39924-52-2	HMDB0036583	BioDeepDB	2	neg	7.74964e+06	6.71715e+06	8.34811e+06	8.70637e+06
M221T520	N-Acetyl-D-glucosamine	221.155	519.6	221.09	3.62783	C8H15NO6	[M]-	Organooxygen compounds	Carbohydrates and carbohydrate conjugates	C00140	Carbohydrate metabolism; Membrane transport	7512-17-6	HMDB0000215	BioDeepDB	2	neg	1.18916e+07	8.27912e+06	9.00072e+06	1.00477e+07
M223T640	Thymidine	223.029	639.7	242.09	2.72439	C10H14N2O5	[M-H2O-H]-	Pyrimidine nucleosides	Pyrimidine 2'-deoxyribonucleosides	C00214	Nucleotide metabolism	50-89-5	HMDB0000273	BioDeepDB	2	neg	4.38988e+07	3.17669e+07	4.26324e+07	4.05118e+07
M227T72_1	Deoxyuridine	227.067	72	228.075	0.986493	C9H12N2O5	[M-H]-	Pyrimidine nucleosides	Pyrimidine 2'-deoxyribonucleosides	C00526	Membrane transport; Nucleotide metabolism	951-78-0	HMDB0000012	BioDeepDB	2	neg	1.46435e+07	6.77197e+06	4.97778e+06	2.19752e+07
M250T552	gamma-Glutamylcysteine	250.145	551.8	250.062	3.04873	C8H14N2O5S	[M]-	Carboxylic acids and derivatives	Amino acids, peptides, and analogues	C00669	Cell growth and death; Metabolism of other amino acids	636-58-8	HMDB0001049	BioDeepDB	2	neg	7.72142e+07	1.02677e+07	5.41344e+07	2.84282e+07
M242T424	1-Hexadecanol	242.056	423.8	242.261	1.566	C16H34O	[M]-	Fatty Acyls	Fatty alcohols	C00823	Lipid metabolism	36653-82-4	HMDB0003424	BioDeepDB	2	neg	295852	26287.5	92422.3	10817.7
M247T527	Pyridoxal phosphate	247.17	526.6	247.025	1.25663	C8H10NO6P	[M]-			C00018	Metabolism of cofactors and vitamins; Digestive system	853645-22-4	HMDB0001491	BioDeepDB	2	neg	2.34124e+06	2.29843e+06	2.05403e+06	2.40984e+06
M283T646	Guanosine	283.264	645.6	283.092	1.6007	C10H13N5O5	[M]-	Purine nucleosides		C00387	Membrane transport; Nucleotide metabolism	118-00-3	HMDB0000133	BioDeepDB	2	neg	2.73911e+07	3.1806e+07	2.61795e+07	2.63182e+07
M270T328	Genistein	270.171	327.9	270.053	20.3188	C15H10O5	[M]-	Isoflavonoids	Isoflav-2-enes	C06563		446-72-0	HMDB0003217	BioDeepDB	2	neg	1.51529e+06	523688	188713	247830
M269T511	Dehydroepiandrosterone	269.213	511.5	288.209	1.95686	C19H28O2	[M-H2O-H]-	Steroids and steroid derivatives	Androstane steroids	C01227	Lipid metabolism; Cancer: overview; Endocrine system; Cancer: specific types	53-43-0	HMDB0000077	BioDeepDB	2	neg	7.9842e+06	4.44618e+06	4.17873e+06	5.57515e+06
M271T521	Epiandrosterone	271.228	520.6	290.225	3.42553	C19H30O2	[M-H2O-H]-	Steroids and steroid derivatives	Androstane steroids	C07635		481-29-8	HMDB0000365	BioDeepDB	2	neg	2.80456e+07	1.5519e+07	1.48304e+07	1.49131e+07
M277T582	Alpha-Linolenic acid	277.218	582.1	278.225	2.07779	C18H30O2	[M-H]-	Fatty Acyls	Lineolic acids and derivatives	C06427	Lipid metabolism	463-40-1	HMDB0001388	BioDeepDB	2	neg	7.58304e+08	8.04561e+08	8.71172e+08	9.07731e+08
M283T550_1	2-Methoxyestradiol	283.17	550.2	302.188	2.08355	C19H26O3	[M-H2O-H]-	Steroids and steroid derivatives	Estrane steroids	C05302	Lipid metabolism	362-07-2	HMDB0000405	BioDeepDB	2	neg	1.98912e+07	1.49614e+07	2.02285e+07	5.46137e+06
M297T616	Nonadecanoic acid	297.28	615.9	298.287	0.255651	C19H38O2	[M-H]-	Fatty Acyls	Fatty acids and conjugates	C16535		646-30-0	HMDB0000772	BioDeepDB	2	neg	1.6562e+07	1.1641e+07	2.33516e+07	1.91322e+07
M299T558	all-trans-Retinoic acid	299.202	557.7	300.209	2.25934	C20H28O2	[M-H]-	Prenol lipids	Retinoids	C00777	Cancer: overview; Immune system; Metabolism of cofactors and vitamins; Cancer: specific types	302-79-4	HMDB0001852	BioDeepDB	2	neg	1.31251e+07	1.06153e+07	1.05772e+07	1.08533e+07
M371T537	Deoxycorticosterone acetate	371.066	536.7	372.23	0.153433	C23H32O4	[M-H]-			C14554		56-47-3		BioDeepDB	2	neg	1.27869e+07	4.50955e+06	8.57795e+06	1.03959e+07
M391T390_1	Chenodeoxycholic acid	391.284	390.1	392.293	2.02746	C24H40O4	[M-H]-	Steroids and steroid derivatives	Bile acids, alcohols and derivatives	C02528	Lipid metabolism; Digestive system	474-25-9	HMDB0000518	BioDeepDB	2	neg	1.19638e+06	551654	671115	674878
M449T645	Glycochenodeoxycholic acid	449.318	645.3	449.314	8.90238	C26H43NO5	[M]-			C05466	Lipid metabolism; Digestive system	16564-43-5		BioDeepDB	2	neg	1.56063e+07	1.6447e+07	2.95757e+07	2.91774e+07
M776T367_3	Thyroxine	775.689	366.7	776.687	11.5618	C15H11I4NO4	[M-H]-	Carboxylic acids and derivatives	Amino acids, peptides, and analogues	C01829	Digestive system; Endocrine system; Signaling molecules and interaction; Amino acid metabolism; Immune disease	51-48-9	HMDB0000248	BioDeepDB	2	neg	1.25169e+06	1.20776e+06	1.16057e+06	971325
M101T50	2-Ketobutyric acid	101.025	49.8	102.032	2.73201	C4H6O3	[M-H]-	Keto acids and derivatives	Short-chain keto acids and derivatives	C00109	Carbohydrate metabolism; Amino acid metabolism	600-18-0	HMDB0000005	BioDeepDB	2	neg	5.89772e+07	4.41071e+07	4.20149e+07	5.83115e+07
M111T72_2	Uracil	111.02	71.7	112.027	3.38676	C4H4N2O2	[M-H]-	Diazines	Pyrimidines and pyrimidine derivatives	C00106	Metabolism of cofactors and vitamins; Metabolism of other amino acids; Nucleotide metabolism	66-22-8	HMDB0000300	BioDeepDB	2	neg	8.31339e+06	6.50368e+06	6.35185e+06	6.85568e+06
M119T49_2	L-Erythrulose	119.035	49.5	120.042	0.84009	C4H8O4	[M-H]-	Organooxygen compounds	Carbohydrates and carbohydrate conjugates	C02045		533-50-6/496-55-9	HMDB0006293	BioDeepDB	2	neg	1.09512e+08	8.37899e+07	8.81025e+07	6.1466e+07
M128T599	Cyanuric acid	128.01	599	129.017	1.56237	C3H3N3O3	[M-H]-	Triazines	1,3,5-triazines	C06554		108-80-5/504-19-8	HMDB0041861	BioDeepDB	2	neg	8.22901e+07	7.51924e+07	5.45333e+07	7.09505e+07
M130T469	Beta-Leucine	130.086	469.3	131.095	7.8717	C6H13NO2	[M-H]-	Carboxylic acids and derivatives	Amino acids, peptides, and analogues	C02486		5699-54-7	HMDB0003640	BioDeepDB	2	neg	7.45964e+06	5.63378e+06	5.85086e+06	7.84738e+06
M137T72	Urocanic acid	137.036	71.7	138.043	2.91894	C6H6N2O2	[M-H]-	Azoles	Imidazoles	C00785	Amino acid metabolism	104-98-3	HMDB0000301	BioDeepDB	2	neg	6.13616e+06	4.52093e+06	639309	3.57614e+06
M138T334	6-Hydroxynicotinic acid	138.02	334	139.027	1.44907	C6H5NO3	[M-H]-	Pyridines and derivatives	Pyridinecarboxylic acids and derivatives	C01020	Metabolism of cofactors and vitamins	5006-66-6	HMDB0002658	BioDeepDB	2	neg	9.89871e+06	6.40629e+06	8.26098e+06	1.13908e+07
M157T51	Allantoin	157.037	51.1	158.044	2.39434	C4H6N4O3	[M-H]-	Azoles	Imidazoles	C01551		97-59-6	HMDB0000462	BioDeepDB	2	neg	1.95951e+07	2.22683e+07	1.30847e+07	1.17057e+07
M145T48	L-Glutamine	145.062	48.1	146.069	0.165447	C5H10N2O3	[M-H]-	Carboxylic acids and derivatives	Amino acids, peptides, and analogues	C00064	Cancer: overview; Metabolism of cofactors and vitamins; Membrane transport; Nervous system; Excretory system; Digestive system; Carbohydrate metabolism; Nucleotide metabolism; Translation; Amino acid metabolism; Energy metabolism	56-85-9	HMDB0000641	BioDeepDB	2	neg	2.97445e+07	3.2803e+07	3.09969e+07	2.59124e+07
M151T133	p-Hydroxyphenylacetic acid	151.041	132.7	152.047	3.52146	C8H8O3	[M-H]-	Phenols	1-hydroxy-2-unsubstituted benzenoids	C00642	Amino acid metabolism	156-38-7	HMDB0000020	MoNA	2	neg	2.0269e+06	1.36771e+06	1.78442e+06	2.10267e+06
M161T50	myo-Inositol	161.046	49.8	180.063	4.90544	C6H12O6	[M-H2O-H]-	Organooxygen compounds	Alcohols and polyols	C00137	Carbohydrate metabolism; Membrane transport; Signal transduction	87-89-8/87-9-8	HMDB0000211	BioDeepDB	2	neg	5.64178e+07	1.85351e+08	1.78833e+08	1.37602e+08
M182T98	4-Pyridoxic acid	182.047	98.2	183.053	3.16403	C8H9NO4	[M-H]-	Pyridines and derivatives	Pyridinecarboxylic acids and derivatives	C00847	Metabolism of cofactors and vitamins	82-82-6	HMDB0000017	BioDeepDB	2	neg	8.23584e+06	1.37727e+07	7.20628e+06	7.69506e+06
M167T49	Uric acid	167.021	48.6	168.028	1.19745	C5H4N4O3	[M-H]-	Imidazopyrimidines	Purines and purine derivatives	C00366	Digestive system; Nucleotide metabolism	69-93-2	HMDB0000289	BioDeepDB	2	neg	3.49701e+07	2.18319e+07	1.9708e+07	4.4522e+07
M173T149_2	Shikimic acid	173.046	149.4	174.053	1.01707	C7H10O5	[M-H]-	Organooxygen compounds	Alcohols and polyols	C00493	Amino acid metabolism	138-59-0	HMDB0003070	BioDeepDB	2	neg	1.4367e+06	1.65189e+06	757793	1.68804e+06
M176T72	N-Formyl-L-methionine	176.038	72	177.046	1.70417	C6H11NO3S	[M-H]-	Carboxylic acids and derivatives	Amino acids, peptides, and analogues	C03145	Amino acid metabolism	4289-98-9	HMDB0001015	BioDeepDB	2	neg	9.1133e+06	4.6175e+06	6.89778e+06	1.3111e+06
M179T407_1	Acetylisoniazid	179.072	406.9	179.07	12.2856	C8H9N3O2	[M]-	Pyridines and derivatives	Pyridinecarboxylic acids and derivatives	C07585	Xenobiotics biodegradation and metabolism	1078-38-2	HMDB0041821	BioDeepDB	2	neg	6.04204e+06	3.15796e+06	2.89431e+06	3.86098e+06
M182T266	L-Homocysteic acid	182.01	265.8	183.02	15.5156	C4H9NO5S	[M-H]-	Carboxylic acids and derivatives	Amino acids, peptides, and analogues	C16511	Signaling molecules and interaction	14857-77-3	HMDB0002205	BioDeepDB	2	neg	1.47872e+06	192875	438127	983829
M203T134_2	L-Tryptophan	203.083	133.6	204.09	2.34387	C11H12N2O2	[M-H]-	Indoles and derivatives	Indolyl carboxylic acids and derivatives	C00078	Cancer: overview; Nervous system; Digestive system; Translation; Amino acid metabolism; Infectious disease: parasitic	73-22-3	HMDB0000929	BioDeepDB	2	neg	2.60442e+08	3.12082e+08	1.78305e+08	3.28455e+08
M249T479	Gemfibrozil	249.15	479.5	250.157	0.305037	C15H22O3	[M-H]-	Phenol ethers		C07020		25812-30-0	HMDB0015371	BioDeepDB	2	neg	8.65927e+06	5.06884e+06	7.84168e+06	1.19033e+07
M240T299	Glucosamine 6-phosphate	240.034	299.2	259.046	26.6213	C6H14NO8P	[M-H2O-H]-	Organooxygen compounds	Carbohydrates and carbohydrate conjugates	C00352	Carbohydrate metabolism; Amino acid metabolism; Endocrine and metabolic disease	3616-42-0	HMDB0001254	BioDeepDB	2	neg	912430	463013	441002	733763
M263T359	(S)-Abscisic acid	263.129	359.2	264.136	1.809	C15H20O4	[M-H]-	Prenol lipids	Sesquiterpenoids	C06082		21293-29-8	HMDB0035140	BioDeepDB	2	neg	364373	334059	230611	486583
M267T446	Pentostatin	267.111	445.7	268.117	2.53079	C11H16N4O4	[M-H]-	Imidazodiazepines		C02267		53910-25-1	HMDB0014692	BioDeepDB	2	neg	2.81686e+06	1.90573e+06	2.14712e+06	1.87342e+06
M272T318	Arbutin	272.097	318.4	272.09	26.0937	C12H16O7	[M]-	Organooxygen compounds	Carbohydrates and carbohydrate conjugates	C06186	Carbohydrate metabolism	497-76-7	HMDB0029943	MoNA	2	neg	138252	135957	133116	116446
M271T492	16-Hydroxy hexadecanoic acid	271.228	492.4	272.235	2.21216	C16H32O3	[M-H]-	Fatty Acyls	Fatty acids and conjugates	C18218		506-13-8	HMDB0006294	BioDeepDB	2	neg	8.90657e+06	1.49273e+07	1.95245e+07	1.83662e+07
M295T536	9,10-Epoxyoctadecenoic acid	295.228	535.7	296.235	0	C18H32O3	[M-H]-	Fatty Acyls	Fatty acids and conjugates	C14825	Lipid metabolism		HMDB0004701	BioDeepDB	2	neg	3.99736e+07	2.30794e+07	7.71544e+07	6.6622e+07
M284T551	Stearic acid	284.272	551.2	284.272	1.4071	C18H36O2	[M]-	Fatty Acyls	Fatty acids and conjugates	C01530	Lipid metabolism	57-11-4/646-29-7	HMDB0000827	BioDeepDB	2	neg	2.76879e+07	1.38654e+07	1.47438e+07	1.71932e+07
M311T448	9(S)-HPODE	311.223	448.1	312.23	0	C18H32O4	[M-H]-	Fatty Acyls	Lineolic acids and derivatives	C14827	Lipid metabolism	29774-12-7	HMDB0006940	BioDeepDB	2	neg	2.02812e+07	1.11327e+07	2.11766e+06	1.46681e+07
M295T468	13S-hydroxyoctadecadienoic acid	295.228	467.9	296.235	0	C18H32O3	[M-H]-	Fatty Acyls	Lineolic acids and derivatives	C14762	Lipid metabolism; Endocrine system	5204-88-6/29623-28-7	HMDB0004667	BioDeepDB	2	neg	3.19007e+07	2.39321e+07	2.50753e+07	3.02954e+07
M317T478	5-KETE	317.213	477.5	318.219	1.50057	C20H30O3	[M-H]-	Fatty Acyls	Fatty acids and conjugates	C14732	Lipid metabolism	126432-17-5/106154-18-1	HMDB0010217	BioDeepDB	2	neg	3.362e+07	1.42536e+07	4.84776e+07	3.77467e+07
M319T507	16(R)-HETE	319.227	506.9	320.235	1.32821	C20H32O3	[M-H]-	Fatty Acyls	Eicosanoids	C14778	Lipid metabolism	183509-22-0	HMDB0004680	BioDeepDB	2	neg	1.21083e+08	1.32932e+08	8.6413e+07	1.17712e+08
M319T494	19(S)-HETE	319.227	493.6	320.235	1.32821	C20H32O3	[M-H]-	Fatty Acyls	Eicosanoids	C14749	Lipid metabolism	79551-85-2/115461-40-0	HMDB0011136	BioDeepDB	2	neg	22775.5	20197.3	1.3349e+06	22189.9
M325T474_1	11-Dehydrocorticosterone	325.184	474.4	344.199	12.27	C21H28O4	[M-H2O-H]-	Steroids and steroid derivatives	Hydroxysteroids	C05490	Lipid metabolism	72-23-1	HMDB0004029	BioDeepDB	2	neg	4.13803e+07	5.02964e+07	3.40835e+07	5.05163e+07
M327T592	Docosahexaenoic acid	327.234	592.3	328.24	2.44474	C22H32O2	[M-H]-	Fatty Acyls	Fatty acids and conjugates	C06429	Lipid metabolism	6217-54-5	HMDB0002183	BioDeepDB	2	neg	1.22805e+10	6.86777e+09	4.80434e+09	3.6869e+09
M329T621_2	Docosapentaenoic acid (22n-3)	329.249	621.5	330.256	0.838272	C22H34O2	[M-H]-	Fatty Acyls	Fatty acids and conjugates	C16513	Lipid metabolism	24880-45-3	HMDB0006528	BioDeepDB	2	neg	5.23073e+08	5.43434e+08	3.86005e+08	4.63772e+08
M335T464	Hepoxilin B3	335.223	463.8	336.23	0.298309	C20H32O4	[M-H]-	Fatty Acyls	Eicosanoids	C14810	Lipid metabolism	71799-95-6	HMDB0004690	BioDeepDB	2	neg	4.53051e+06	3.91599e+06	4.39258e+06	3.80813e+06
M337T473_2	8,9-DiHETrE	337.239	472.8	338.246	0.818411	C20H34O4	[M-H]-	Fatty Acyls	Eicosanoids	C14773	Lipid metabolism; Nervous system	192461-96-4	HMDB0002311	BioDeepDB	2	neg	2.33231e+06	1.57257e+06	1.79991e+06	1.87433e+06
M365T592	20-Carboxy-leukotriene B4	365.207	592.1	366.204	26.0127	C20H30O6	[M-H]-	Fatty Acyls	Fatty acids and conjugates	C05950	Lipid metabolism	80434-82-8	HMDB0006059	BioDeepDB	2	neg	2.10896e+07	2.02209e+07	1.63199e+07	1.76646e+07
M409T478	LysoPA(16_0_0_0)	409.236	478.4	410.243	0.0586459	C19H39O7P	[M-H]-	Glycerophospholipids	Glycerophosphates	C04036			HMDB0007853	BioDeepDB	2	neg	8.19105e+06	1.15206e+07	1.36682e+07	7.03382e+06
M467T579_2	Buprenorphine	467.315	578.9	467.304	25.4646	C29H41NO4	[M]-	Phenanthrenes and derivatives		C08007		52485-79-7	HMDB0015057	BioDeepDB	2	neg	2.43572e+08	5.62084e+07	6.20544e+07	3.98711e+07
M557T497_1	Cucurbitacin B	557.316	497.2	558.319	7.49305	C32H46O8	[M-H]-	Steroids and steroid derivatives	Cucurbitacins	C08794		6199-67-3	HMDB0034927	BioDeepDB	2	neg	6.08697e+06	4.5453e+06	5.9861e+06	4.89183e+06
M735T583	PS(18_0_18_1(9Z))	734.513	583.5		20.694	C8H12NO10PR2	[M-H]-	Glycerophospholipids	Glycerophosphoserines	C02737	Lipid metabolism; Amino acid metabolism; Infectious disease: parasitic; Immune disease	3036-82-6	HMDB0010163	BioDeepDB	2	neg	3.60666e+06	4.86633e+06	6.11788e+06	4.75207e+06
M198T434	Procollagen 5-hydroxy-L-lysine	197.808	433.8		0.280911	C7H13N3O3R2	[M-H]-			C01211	Amino acid metabolism	13204-98-3		BioDeepDB	2	neg	7.63408e+06	5.90318e+06	4.37991e+06	6.09072e+06
M113T50_1	Oxalacetic acid	112.986	49.8	132.006	15.1346	C4H4O5	[M-H2O-H]-	Keto acids and derivatives	Short-chain keto acids and derivatives	C00036	Cancer: overview; Excretory system; Endocrine system; Carbohydrate metabolism; Amino acid metabolism	328-42-7/149-63-3	HMDB0000223	MoNA	2	neg	4.43737e+08	1.12558e+09	1.89312e+09	4.41222e+08
M129T99	Ketoleucine	129.056	99.3	130.063	2.91346	C6H10O3	[M-H]-	Keto acids and derivatives	Short-chain keto acids and derivatives	C00233	Amino acid metabolism	816-66-0	HMDB0000695	MoNA	2	neg	5.09907e+07	5.49629e+07	4.67469e+07	6.64204e+07
M129T110	3-Methyl-2-oxovaleric acid	129.056	109.7	130.063	2.91346	C6H10O3	[M-H]-	Keto acids and derivatives	Short-chain keto acids and derivatives	C03465		1460-34-0	HMDB0000491	MoNA	2	neg	3.74566e+07	4.44031e+07	4.244e+07	4.09537e+07
M137T149	3-Hydroxybenzoic acid	137.025	149.1	138.032	2.01424	C7H6O3	[M-H]-	Benzene and substituted derivatives	Benzoic acids and derivatives	C00587	Amino acid metabolism	99-06-9	HMDB0002466	MoNA	2	neg	1.40966e+06	2.065e+06	1.45296e+06	964453
M151T334	3-Hydroxyphenylacetic acid	151.041	334	152.047	2.85939	C8H8O3	[M-H]-	Phenols	1-hydroxy-4-unsubstituted benzenoids	C05593	Amino acid metabolism	621-37-4	HMDB0000440	MoNA	2	neg	5.17534e+06	2.00952e+06	2.62711e+06	2.48019e+06
M163T79	4-Hydroxycinnamic acid	163.04	78.7	164.047	2.03559	C9H8O3	[M-H]-	Cinnamic acids and derivatives	Hydroxycinnamic acids and derivatives	C00811	Amino acid metabolism; Metabolism of cofactors and vitamins	7400-08-0/7400-08-0 501-98-4/501-98-4	HMDB0002035	MoNA	2	neg	5.88745e+06	2.73964e+06	4.7529e+06	1.95727e+06
M183T256_1	2,4-Dinitrophenol	183.005	256	184.012	0.961723	C6H4N2O5	[M-H]-	Textile Chemicals/Auxiliary/Dyes; Pesticides/Herbicides; Industrial Chemicals; Endogenous Metabolites		C02496		51-28-5		mzCloud	2	neg	2.63545e+06	3.39139e+06	3.60921e+06	3.55023e+06
M184T194	Ecgonine	184.099	193.7	185.105	3.67195	C9H15NO3	[M-H]-	Tropane alkaloids		C10858		481-37-8	HMDB0006548	MoNA	2	neg	1.11239e+06	578578	300604	414751
M241T617	Pentadecanoic acid	241.218	616.7	242.225	1.97332	C15H30O2	[M-H]-	Fatty Acyls	Fatty acids and conjugates	C16537		1002-84-2	HMDB0000826	MoNA	2	neg	2.39915e+07	2.64064e+06	1.79631e+06	2.78378e+07
M243T53	Pseudouridine	243.062	53.2	244.07	0.0987402	C9H12N2O6	[M-H]-	Nucleoside and nucleotide analogues		C02067	Nucleotide metabolism	1445-07-4	HMDB0000767	MoNA	2	neg	7.29423e+06	7.61274e+06	8.65285e+06	7.20619e+06
M243T72_1	Uridine	243.062	71.7	244.07	0.510158	C9H12N2O6	[M-H]-	Pyrimidine nucleosides		C00299	Membrane transport; Nucleotide metabolism	58-96-8	HMDB0000296	MoNA	2	neg	1.51723e+07	5.0324e+06	2.19169e+07	2.14428e+07
M293T481	Cinchonidine	293.161	481.1	294.173	16.7962	C19H22N2O	[M-H]-	Cinchona alkaloids		C11379		485-71-2	HMDB0030282	MoNA	2	neg	410974	1.10525e+06	1.4195e+06	1.26614e+06
M293T511	9-OxoODE	293.214	511.1	294.219	4.35178	C18H30O3	[M-H]-	Fatty Acyls	Lineolic acids and derivatives	C14766	Lipid metabolism	54232-59-6	HMDB0004669	MoNA	2	neg	1.36281e+07	1.35418e+07	3.13949e+07	3.20037e+07
M307T668	Eicosadienoic acid	307.265	668.2	308.272	1.77569	C20H36O2	[M-H]-	Fatty Acyls	Fatty acids and conjugates	C16525	Lipid metabolism	2091-39-6/5598-38-9	HMDB0005060	MoNA	2	neg	1.32714e+08	4.58087e+07	1.17741e+08	7.98602e+07
M311T689	Arachidic acid	311.296	689.5	312.303	1.43105	C20H40O2	[M-H]-	Fatty Acyls	Fatty acids and conjugates	C06425	Lipid metabolism	506-30-9	HMDB0002212	MoNA	2	neg	9.08506e+07	4.02915e+07	4.05e+07	1.43831e+08
M144T72	4-Acetamidobutanoate	144.067	72	145.074	2.6099	C6H11NO3	[M-H]-	Carboxylic acids and derivatives	Amino acids, peptides, and analogues	C02946	Amino acid metabolism	3025-96-5	HMDB0003681	mzCloud	2	neg	1.08517e+07	4.06694e+06	3.6615e+06	5.47747e+06
M164T90	L-Phenylalanine	164.072	90.1	165.079	1.0727	C9H11NO2	[M-H]-	Carboxylic acids and derivatives	Amino acids, peptides, and analogues	C00079	Cancer: overview; Membrane transport; Digestive system; Translation; Amino acid metabolism	63-91-2	HMDB0000159	mzCloud	2	neg	1.21271e+08	2.00399e+08	1.16464e+08	1.97977e+08
M203T236	Tryptophan	203.083	236.4	204.09	2.34387	C11H12N2O2	[M-H]-	Carboxylic acids and derivatives	Amino acids, peptides, and analogues	C00806		54-12-6	HMDB0013209	mzCloud	2	neg	869660	306838	282795	359966
M277T382	Dibutyl phthalate	277.144	381.8	278.152	0.0865974	C16H22O4	[M-H]-	Benzene and substituted derivatives	Benzoic acids and derivatives	C14214		84-74-2	HMDB0033244	mzCloud	2	neg	1.20591e+07	1.2627e+07	8.61461e+06	6.76547e+06
M280T89	Sulfamethoxypyridazine	280.06	89.3	280.063	10.3941	C11H12N4O3S	[M]-	Therapeutics/Prescription Drugs		D02439				mzCloud	2	neg	2.27641e+06	1.58395e+06	2.64371e+06	1.66851e+06
M285T406	Hexadecanedioate	285.208	406.3	286.214	2.3702	C16H30O4	[M-H]-	Fatty Acyls	Fatty acids and conjugates	C19615		505-54-4	HMDB0000672	mzCloud	2	neg	1.19283e+06	1.26863e+06	1.20985e+06	1.33283e+06
M309T465	13(S)-HPOT	309.207	464.6	310.214	1.69466	C18H30O4	[M-H]-			C04785	Lipid metabolism			mzCloud	2	neg	3.87753e+07	2.39185e+06	4.09094e+06	1.3942e+07
M353T84	Neochlorogenic acid	353.089	83.8	354.095	3.89703	C16H18O9	[M-H]-			C17147		c("906-33-2", "202650-88-2")		mzCloud	2	neg	1.18884e+06	1.80276e+06	831012	815344

## Sheet: Tables12
Table.S12 Expression of INSIG1 and NPC1L1 in camels, cattle, and humans (TPM)
Sample	gene-INSIG1	gene-NPC1L1	species	tissue
camel_SRR20303266	67.0279	0.281275	camel	Liver
camel_SRR20303267	88.4828	0.178734	camel	Liver
camel_SRR20303268	85.7052	0.120863	camel	Liver
camel_SRR22387671	103.36	0.110854	camel	Liver
camel_SRR6228810	146.391	0.120795	camel	Liver
camel_SRR20303289	37.3035	0.126468	camel	Liver
camel_SRR20303290	88.3873	0.501874	camel	Liver
camel_SRR20303291	49.5892	0.094126	camel	Liver
cattle_ERR3668608	42.4641	17.3982	cattle	Liver
cattle_ERR3668609	238.969	37.9456	cattle	Liver
cattle_ERR3668610	250.816	50.9385	cattle	Liver
cattle_ERR3668611	108.533	17.2665	cattle	Liver
cattle_ERR3668612	128.527	14.3092	cattle	Liver
cattle_ERR3668613	223.36	29.863	cattle	Liver
cattle_SRR19451749	41.1005	4.4254	cattle	Liver
cattle_SRR19451750	242.462	5.29063	cattle	Liver
cattle_SRR19451752	161.957	5.93472	cattle	Liver
cattle_SRR19451753	117.344	2.62376	cattle	Liver
cattle_SRR19451754	38.2086	6.52102	cattle	Liver
cattle_SRR19451755	236.283	5.18464	cattle	Liver
cattle_SRR19451756	162.199	3.23149	cattle	Liver
human_SRR12697112	140.754	0.996643	human	Liver
human_SRR12697113	58.7672	1.23526	human	Liver
human_SRR20210877	186.621	0.464712	human	Liver
human_SRR20210878	332.976	0.741382	human	Liver
human_SRR20210879	135.649	0.688704	human	Liver
human_SRR20210880	242.728	0.799595	human	Liver
human_SRR20210881	162.715	0.5107	human	Liver
human_SRR20210882	213.265	0.565673	human	Liver
human_SRR8614200	299.267	1.15865	human	Liver
human_SRR8614202	170.121	1.0436	human	Liver
human_SRR8614204	289.316	1.08348	human	Liver
human_SRR8614305	214.219	1.84192	human	Liver
human_SRR8614306	204.216	1.9442	human	Liver
human_SRR8614307	226.752	1.38128	human	Liver
human_SRR8614309	237.356	1.25372	human	Liver
human_SRR8614311	336.79	1.99013	human	Liver
pig_SRR8510414	101.172	1.27222	pig	Liver
pig_SRR8510415	155.368	5.97316	pig	Liver
pig_SRR8510418	85.4705	1.7135	pig	Liver
pig_SRR8510420	330.43	8.4355	pig	Liver
pig_SRR8510421	105.604	2.20874	pig	Liver
pig_SRR8510423	117.038	3.53896	pig	Liver
pig_SRR8510424	133.64	2.49909	pig	Liver
pig_SRR8510425	136.913	2.31558	pig	Liver
pig_SRR8510426	166.594	4.24724	pig	Liver

[truncated: 4 more sheets: Tables13, Tables14, Tables15, Tables16]
